# Supplementary material
Source: PubMed Central journal article supplement (PMC3271770)
Supplement: supp_pp.111.185033_185033suppfigstbls.pdf [file supp_pp.111.185033_185033suppfigstbls.pdf]

## Supplemental Figures:

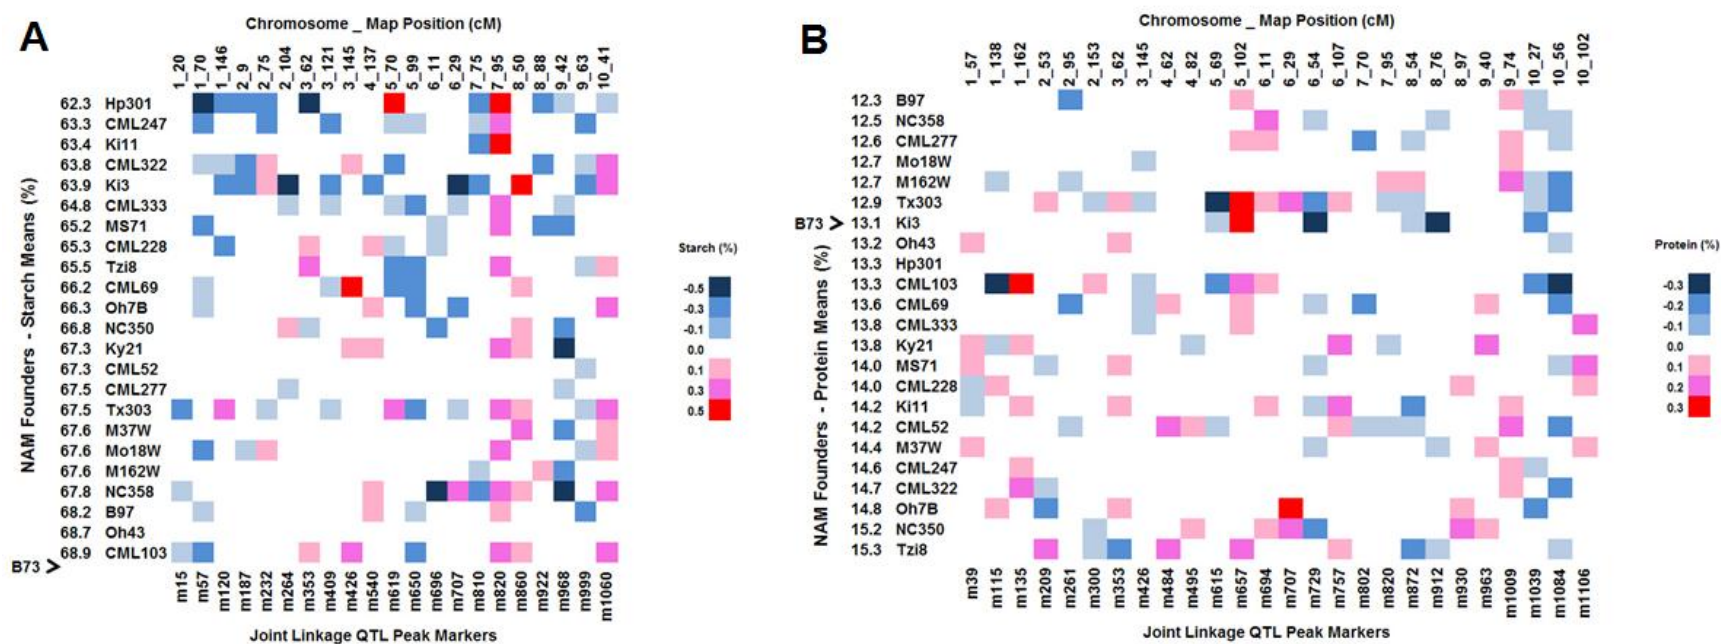

Fig. S1. Heat map displaying additive allelic effects for (A) starch and (B) protein percent kernel content on a dry matter basis QTL for the 23 NAM founders relative to B73. The horizontal top horizontal axis lists the chromosome and genetic map position for each QTL peak, and the bottom axis shows the NAM map SNP selected by stepwise regression. The vertical axis displays the 23 inbred NAM founder lines sorted in increasing (A) starch and (B) protein content. Allelic effects are color coded based on (A) 0.2% increments for starch and (B) 0.1% increments for protein.

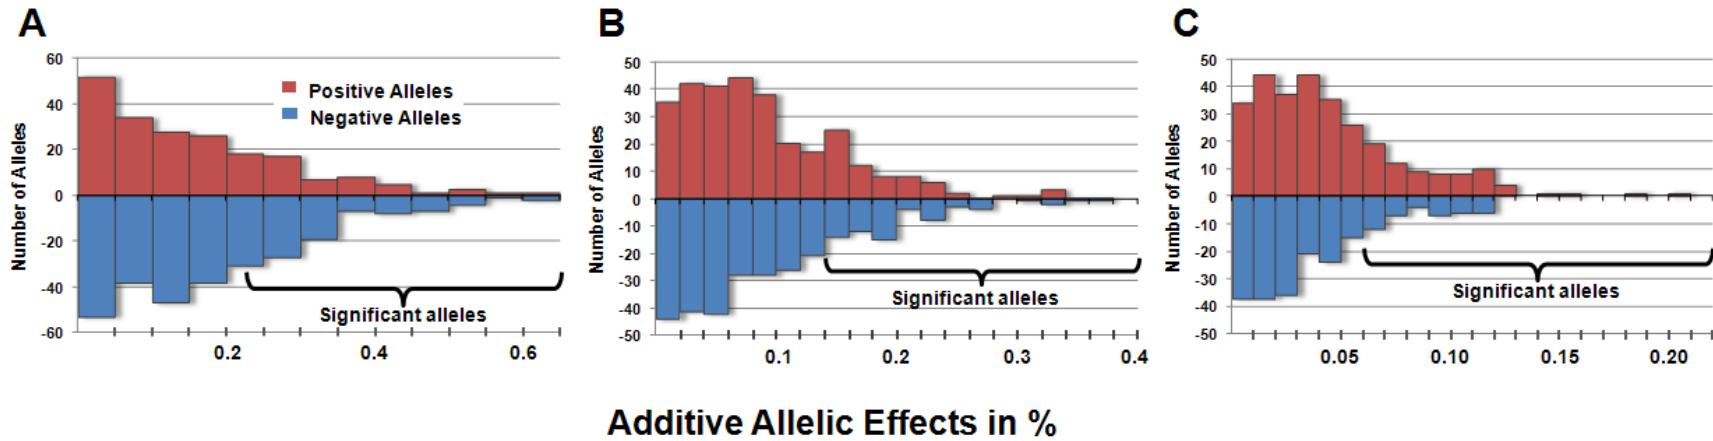

Fig. S2. Distribution of allele effect size derived from joint-linkage mapping in NAM for percent (A) starch, (B) protein, and (C) oil kernel content on a dry matter basis relative to B73. Significant alleles after a 5% FDR correction are indicated.

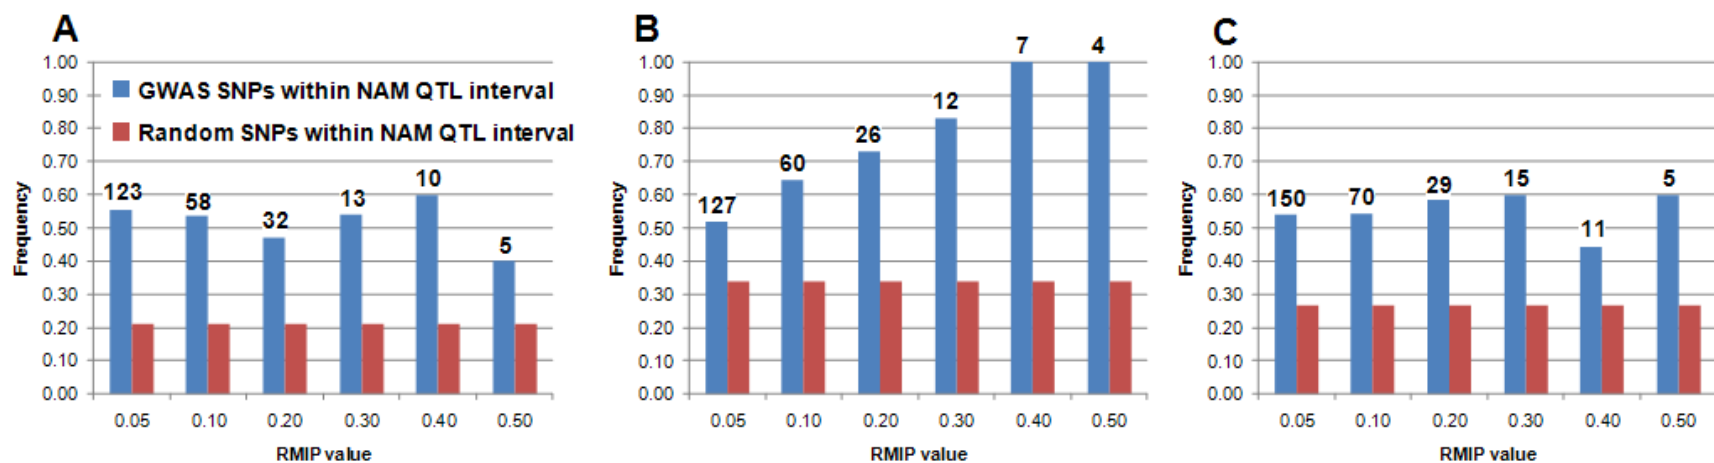

Fig. S3. Significant SNPs from the NAM sub-sampling GWAS method overlapped with NAM joint-linkage QTL intervals. Proportion of associated SNPs within QTL support intervals were calculated for multiple RMIP values. Expected proportion by chance was obtained by calculating the proportion of the number of HapMap.v1 SNPs within the QTL support intervals. The number of associated SNPs for each RMIP value is displayed above the GWAS bars. (A) Starch. (B) Protein. (C) Oil.

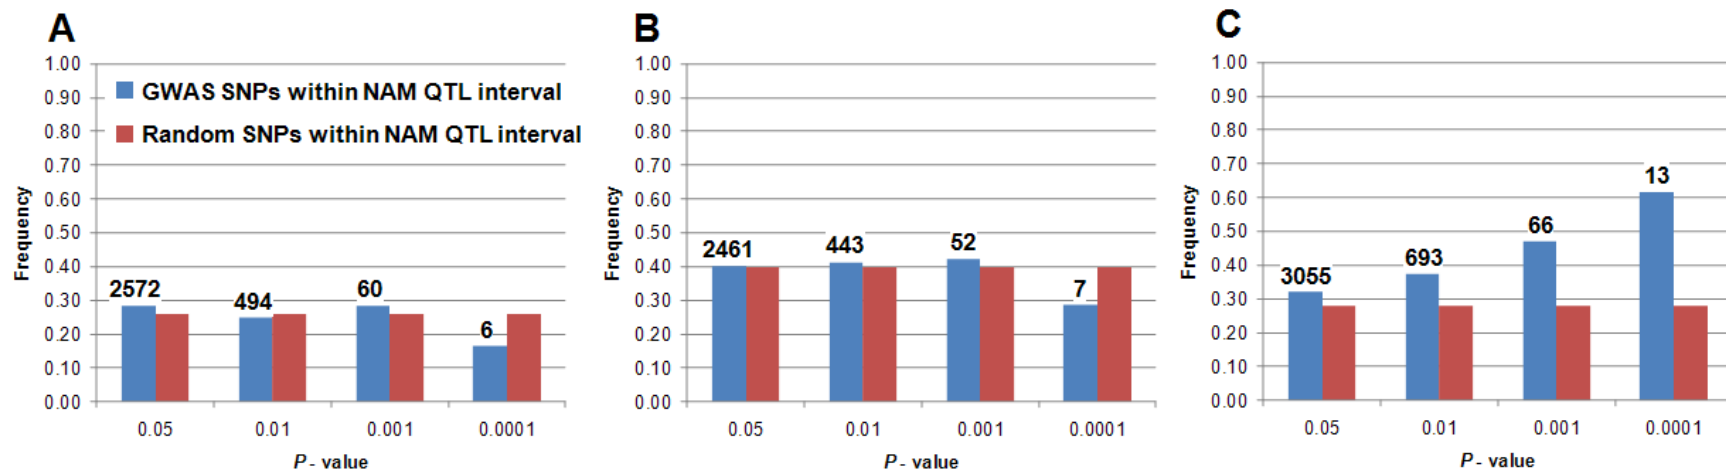

Fig. S4. Significant SNP overlap from 282 inbred association panel genome scan overlapped with NAM joint-linkage QTL intervals. Proportion of SNPs within QTL support intervals were calculated for multiple  $P$ -value thresholds. Expected proportion by chance was obtained by calculating the proportion of the number of MaizeSNP50 BeadChip SNPs within the QTL support intervals. The number of SNPs for each  $P$ -value threshold is displayed above the GWAS bars. (A) Starch. (B) Protein. (C) Oil.

## Supplemental Tables:

Table S1: Means and ranges for percent starch, protein, and oil kernel composition BLUPS on a dry matter basis in each nested association mapping (NAM) family and parental lines.

| Family | Trait   | Parental BLUP<br>(%) | RIL BLUPs   |            |            |
|--------|---------|----------------------|-------------|------------|------------|
|        |         |                      | Mean<br>(%) | Min<br>(%) | Max<br>(%) |
| B73    | Starch  | 69.6                 | --          | --         | --         |
| B73    | Protein | 13.1                 | --          | --         | --         |
| B73    | Oil     | 3.6                  | --          | --         | --         |
| B97    | Starch  | 68.2                 | 69.0        | 64.9       | 71.5       |
| B97    | Protein | 12.3                 | 13.0        | 11.1       | 14.9       |
| B97    | Oil     | 4.0                  | 4.0         | 3.3        | 4.7        |
| CML103 | Starch  | 68.9                 | 68.5        | 64.5       | 71.6       |
| CML103 | Protein | 13.3                 | 13.2        | 10.9       | 15.8       |
| CML103 | Oil     | 4.3                  | 4.3         | 3.4        | 5.4        |
| CML228 | Starch  | 65.3                 | 66.4        | 62.8       | 69.2       |
| CML228 | Protein | 14.0                 | 14.4        | 12.8       | 16.1       |
| CML228 | Oil     | 5.1                  | 4.7         | 3.5        | 5.9        |
| CML247 | Starch  | 63.3                 | 66.7        | 62.0       | 69.9       |
| CML247 | Protein | 14.6                 | 14.0        | 12.3       | 15.9       |
| CML247 | Oil     | 3.6                  | 4.1         | 3.4        | 4.7        |
| CML277 | Starch  | 67.5                 | 68.3        | 64.3       | 71.4       |
| CML277 | Protein | 12.6                 | 13.3        | 11.5       | 15.2       |
| CML277 | Oil     | 4.0                  | 4.0         | 3.0        | 4.8        |
| CML322 | Starch  | 63.8                 | 67.5        | 62.5       | 70.9       |
| CML322 | Protein | 14.7                 | 13.6        | 11.5       | 15.4       |
| CML322 | Oil     | 5.4                  | 4.5         | 3.6        | 5.5        |
| CML333 | Starch  | 64.8                 | 67.0        | 63.1       | 71.0       |
| CML333 | Protein | 13.8                 | 13.6        | 12.3       | 15.1       |
| CML333 | Oil     | 5.5                  | 4.8         | 3.9        | 5.8        |

Table S1: (continued...)

| Family | Trait   | Parental<br>BLUP (%) | RIL BLUPs |            |            |
|--------|---------|----------------------|-----------|------------|------------|
|        |         |                      | Mean (%)  | Min<br>(%) | Max<br>(%) |
| CML52  | Starch  | 67.3                 | 67.2      | 64.9       | 69.8       |
| CML52  | Protein | 14.2                 | 14.3      | 12.0       | 16.4       |
| CML52  | Oil     | 4.4                  | 4.5       | 3.7        | 5.6        |
| CML69  | Starch  | 66.2                 | 67.9      | 64.0       | 72.3       |
| CML69  | Protein | 13.6                 | 13.9      | 12.3       | 16.0       |
| CML69  | Oil     | 4.6                  | 4.2       | 3.2        | 5.2        |
| Hp301  | Starch  | 62.3                 | 66.4      | 59.7       | 70.9       |
| Hp301  | Protein | 13.3                 | 13.5      | 12.2       | 14.9       |
| Hp301  | Oil     | 4.2                  | 4.5       | 3.7        | 5.4        |
| Ki11   | Starch  | 63.4                 | 67.3      | 64.1       | 70.2       |
| Ki11   | Protein | 14.2                 | 13.2      | 11.5       | 15.5       |
| Ki11   | Oil     | 4.7                  | 4.1       | 3.5        | 4.8        |
| Ki3    | Starch  | 63.9                 | 66.6      | 60.6       | 71.4       |
| Ki3    | Protein | 13.1                 | 13.8      | 11.1       | 16.1       |
| Ki3    | Oil     | 4.6                  | 4.3       | 3.6        | 5.6        |
| Ky21   | Starch  | 67.3                 | 69.0      | 64.2       | 71.3       |
| Ky21   | Protein | 13.8                 | 13.0      | 11.1       | 15.6       |
| Ky21   | Oil     | 3.6                  | 3.8       | 3.1        | 4.8        |
| M162W  | Starch  | 67.6                 | 68.5      | 63.9       | 72.2       |
| M162W  | Protein | 12.7                 | 13.2      | 11.4       | 15.8       |
| M162W  | Oil     | 4.4                  | 4.0       | 3.1        | 5.1        |
| M37W   | Starch  | 67.6                 | 69.3      | 66.0       | 73.0       |
| M37W   | Protein | 14.4                 | 13.0      | 10.8       | 15.1       |
| M37W   | Oil     | 3.6                  | 3.6       | 2.9        | 4.4        |
| Mo18W  | Starch  | 67.6                 | 67.7      | 63.5       | 70.3       |
| Mo18W  | Protein | 12.7                 | 13.4      | 11.8       | 14.8       |
| Mo18W  | Oil     | 4.1                  | 4.3       | 3.6        | 5.0        |

Table S1: (continued...)

| Family | Trait   | Parental<br>BLUP (%) | RIL BLUPs |            |         |
|--------|---------|----------------------|-----------|------------|---------|
|        |         |                      | Mean (%)  | Min<br>(%) | Max (%) |
| MS71   | Starch  | 65.2                 | 67.5      | 64.0       | 70.8    |
| MS71   | Protein | 14.0                 | 13.4      | 11.6       | 15.7    |
| MS71   | Oil     | 4.2                  | 4.0       | 3.4        | 5.0     |
| NC350  | Starch  | 66.8                 | 68.4      | 64.0       | 71.2    |
| NC350  | Protein | 15.2                 | 13.8      | 11.7       | 16.6    |
| NC350  | Oil     | 5.3                  | 4.4       | 3.5        | 5.8     |
| NC358  | Starch  | 67.8                 | 67.6      | 63.8       | 72.4    |
| NC358  | Protein | 12.5                 | 13.4      | 11.0       | 15.5    |
| NC358  | Oil     | 3.9                  | 4.0       | 3.4        | 4.9     |
| Oh43   | Starch  | 68.7                 | 68.3      | 66.2       | 70.6    |
| Oh43   | Protein | 13.2                 | 14.0      | 12.7       | 15.6    |
| Oh43   | Oil     | 3.5                  | 3.8       | 3.0        | 4.7     |
| Oh7B   | Starch  | 66.3                 | 68.0      | 62.8       | 70.8    |
| Oh7B   | Protein | 14.8                 | 13.8      | 11.9       | 16.8    |
| Oh7B   | Oil     | 5.3                  | 4.5       | 3.6        | 5.5     |
| Tx303  | Starch  | 67.5                 | 68.3      | 64.2       | 72.8    |
| Tx303  | Protein | 12.9                 | 13.6      | 11.2       | 16.0    |
| Tx303  | Oil     | 3.9                  | 4.0       | 2.8        | 5.8     |
| Tzi8   | Starch  | 65.5                 | 66.3      | 61.8       | 70.4    |
| Tzi8   | Protein | 15.3                 | 14.6      | 12.3       | 17.7    |
| Tzi8   | Oil     | 5.2                  | 4.8       | 3.8        | 6.4     |

Table S2: NAM joint-linkage mapping analysis summary for percent starch content on a dry matter basis

| QTL        | Marker ID   | Chr | cM    | AGP_v1<br>(bp) | SS   | df   | MS     | F      | P-value | R <sup>2</sup> | Support interval<br>(cM) <sup>a</sup> | Interval Length<br>(cM) | Support Interval<br>AGP_v1 (bp) | Interval Length<br>AGP_v1 (bp) |
|------------|-------------|-----|-------|----------------|------|------|--------|--------|---------|----------------|---------------------------------------|-------------------------|---------------------------------|--------------------------------|
| m15        | PZA00106.10 | 1   | 20.1  | 10,068,913     | 23   | 88   | 3.81   | 3.10   | 9.1E-07 | 0.01           | 11.5 - 24.4                           | 12.9                    | 6,220,629 - 12,208,717          | 5,988,088                      |
| m57        | PZB01062.3  | 1   | 70.3  | 56,846,393     | 23   | 287  | 12.46  | 10.14  | 1.8E-35 | 0.03           | 69.1 - 73.3                           | 4.2                     | 54,049,352 - 63,913,678         | 9,864,326                      |
| m120       | PZA03064.6  | 1   | 146.0 | 248,503,059    | 23   | 109  | 4.73   | 3.84   | 1.8E-09 | 0.01           | 129.8 - 146.6                         | 16.8                    | 222,427,674 - 251,142,743       | 28,715,069                     |
| m187       | PZB01233.1  | 2   | 8.5   | 3,375,793      | 23   | 121  | 5.25   | 4.27   | 4.1E-11 | 0.01           | 5.7 - 11.5                            | 5.8                     | 2,484,113 - 4,180,858           | 1,696,745                      |
| m232       | PHM3457.6   | 2   | 74.8  | 62,804,386     | 23   | 127  | 5.52   | 4.49   | 5.8E-12 | 0.01           | 70.9 - 82.5                           | 11.6                    | 48,526,009 - 161,878,369        | 113,352,360                    |
| m264       | PHM3055.9   | 2   | 103.7 | 192,601,949    | 23   | 99   | 4.29   | 3.49   | 3.7E-08 | 0.01           | 103.7 - 109.9                         | 6.2                     | 192,601,949 - 202,113,283       | 9,511,334                      |
| m353       | PZD00016.4  | 3   | 62.4  | 133,481,025    | 23   | 155  | 6.75   | 5.49   | 6.3E-16 | 0.01           | 61.2 - 65.5                           | 4.3                     | 130,082,268 - 145,421,390       | 15,339,122                     |
| m409       | PZA02616.1  | 3   | 120.7 | 210,161,705    | 23   | 106  | 4.62   | 3.76   | 3.8E-09 | 0.01           | 104 - 132.8                           | 28.8                    | 196,870,259 - 216,915,146       | 20,044,887                     |
| m426       | PZA01688.3  | 3   | 145.3 | 223,670,206    | 23   | 112  | 4.87   | 3.96   | 6.2E-10 | 0.01           | 136.8 - 146.8                         | 10.0                    | 219,859,786 - 224,184,332       | 4,324,546                      |
| m540       | PZA01905.12 | 4   | 136.6 | 244,087,628    | 23   | 98   | 4.26   | 3.46   | 4.5E-08 | 0.01           | 135.6 - 136.6                         | 1.0                     | 243,937,276 - 244,087,628       | 150,352                        |
| m619       | PZA02164.16 | 5   | 70.0  | 112,180,088    | 23   | 166  | 7.23   | 5.88   | 1.6E-17 | 0.01           | 70.0 - 75.6                           | 5.6                     | 97,952,577 - 160,321,863        | 62,369,286                     |
| m650       | PZA02383.1  | 5   | 98.8  | 189,143,714    | 23   | 306  | 13.32  | 10.84  | 1.8E-38 | 0.03           | 90.2 - 100.2                          | 10.0                    | 179,952,918 - 191,075,482       | 11,122,564                     |
| m696       | PZA00543.12 | 6   | 11.3  | 80,533,790     | 23   | 184  | 8.01   | 6.52   | 3.7E-20 | 0.02           | 6.9 - 22.1                            | 15.2                    | 20,837,695 - 95,788,878         | 74,951,183                     |
| m707       | PZB01658.1  | 6   | 28.7  | 102,953,989    | 23   | 102  | 4.44   | 3.61   | 1.3E-08 | 0.01           | 27.8 - 28.7                           | 0.9                     | 102,565,657 - 102,953,989       | 388,332                        |
| m810       | PZA03728.1  | 7   | 75.3  | 138,551,744    | 23   | 100  | 4.35   | 3.54   | 2.4E-08 | 0.01           | 75.3 - 77.0                           | 1.7                     | 137,207,831 - 138,551,744       | 1,343,913                      |
| m820       | PZA02386.2  | 7   | 95.2  | 154,593,844    | 23   | 205  | 8.93   | 7.27   | 2.9E-23 | 0.02           | 95.2                                  | 0.0                     | 0.0                             | -                              |
| m860       | PZA00758.1  | 8   | 49.9  | 23,796,614     | 23   | 220  | 9.57   | 7.79   | 1.8E-25 | 0.02           | 48.6 - 56.0                           | 7.4                     | 22,422,862 - 90,837,884         | 68,415,022                     |
| m922       | PHM3465.6   | 8   | 88.2  | 159,478,175    | 23   | 155  | 6.74   | 5.48   | 6.6E-16 | 0.01           | 80.2 - 94.1                           | 13.9                    | 151,452,478 - 163,067,046       | 11,614,568                     |
| m968       | PZB01110.6  | 9   | 41.8  | 24,028,939     | 23   | 423  | 18.37  | 14.95  | 3.7E-56 | 0.04           | 39.4 - 45.2                           | 5.8                     | 22,041,392 - 37,421,647         | 15,380,255                     |
| m999       | PZA00213.19 | 9   | 62.9  | 126,584,775    | 23   | 132  | 5.76   | 4.69   | 1.0E-12 | 0.01           | 54.0 - 69.4                           | 15.4                    | 109,910,040 - 133,450,589       | 23,540,549                     |
| m1060      | PHM12990.15 | 10  | 40.8  | 86,998,024     | 23   | 198  | 8.61   | 7.00   | 3.7E-22 | 0.02           | 33.9 - 47.1                           | 13.2                    | 18,903,610 - 117,796,659        | 98,893,049                     |
| Population |             |     |       |                | 22   | 3262 | 148.26 | 120.62 | 0       | 0.29           |                                       | 9.1                     |                                 |                                |
| Error      |             |     |       |                | 3809 | 4682 | 1.23   |        |         |                |                                       |                         |                                 |                                |

<sup>a</sup> P<0.05 support interval for each QTL



Table S3: NAM joint-linkage mapping analysis summary for percent protein content on a dry matter basis.

| QTL        | Marker ID    | Chr | cM    | AGP_v1<br>(bp) | SS   | df   | MS    | F      | <i>P</i> -value | <i>R</i> <sup>2</sup> | Support interval<br>(cM) <sup>a</sup> | Interval Length<br>(cM) | Support Interval<br>AGP_v1 (bp) | Interval Length<br>AGP_v1 (bp) |
|------------|--------------|-----|-------|----------------|------|------|-------|--------|-----------------|-----------------------|---------------------------------------|-------------------------|---------------------------------|--------------------------------|
| m39        | PZA02271.1   | 1   | 56.5  | 38,608,085     | 23   | 24   | 1.04  | 2.91   | 4.0E-06         | 0.01                  | 54.0 - 70.3                           | 16.3                    | 34,476,379 - 56,846,393         | 22,370,014                     |
| m115       | PZA03001.15  | 1   | 137.6 | 231,037,638    | 23   | 47   | 2.06  | 5.77   | 4.7E-17         | 0.01                  | 132.9 - 140.2                         | 7.3                     | 224,518,354 - 237,638,987       | 13,120,633                     |
| m135       | PZB00895.1   | 1   | 162.2 | 268,369,738    | 23   | 39   | 1.71  | 4.78   | 4.3E-13         | 0.01                  | 156.5 - 169.2                         | 12.7                    | 260,297,447 - 276,644,729       | 16,347,282                     |
| m209       | PZA00590.1   | 2   | 53.3  | 21,991,096     | 23   | 38   | 1.64  | 4.59   | 2.4E-12         | 0.01                  | 53.3 - 64.1                           | 10.8                    | 21,991,096 - 40,814,002         | 18,822,906                     |
| m261       | PZA00755.2   | 2   | 94.9  | -              | 23   | 45   | 1.94  | 5.42   | 1.2E-15         | 0.01                  | 81.7 - 98.9                           | 17.2                    | 155,867,789 - 187,225,285       | 31,357,496                     |
| m300       | PZA03321.4   | 2   | 153.4 | 234,574,710    | 23   | 26   | 1.15  | 3.22   | 3.4E-07         | 0.01                  | 151.6 - 155.7                         | 4.1                     | 231,190,534 - 233,128,413       | 1,937,879                      |
| m353       | PZD00016.4   | 3   | 62.4  | 133,481,025    | 23   | 38   | 1.67  | 4.68   | 1.1E-12         | 0.01                  | 55.5 - 74.3                           | 18.8                    | 37,537,206 - 161,515,805        | 123,978,599                    |
| m426       | PZA01688.3   | 3   | 145.1 | 223,670,206    | 23   | 35   | 1.52  | 4.26   | 4.5E-11         | 0.01                  | 145.1 - 145.3                         | 0.2                     | 223,670,047 - 223,670,206       | 159                            |
| m484       | PZA03152.3   | 4   | 61.8  | 147,045,311    | 23   | 47   | 2.06  | 5.75   | 5.5E-17         | 0.01                  | 55.2 - 69.8                           | 14.6                    | 49,713,730 - 158,126,226        | 108,412,496                    |
| m495       | PZA01658.1   | 4   | 81.7  | 172,269,404    | 23   | 23   | 0.99  | 2.76   | 1.3E-05         | 0.01                  | 80.6 - 89.1                           | 8.5                     | 171,613,479 - 177,666,469       | 6,052,990                      |
| m615       | PZA01693.1   | 5   | 68.7  | 83,544,179     | 23   | 33   | 1.42  | 3.97   | 5.7E-10         | 0.01                  | 67.5 - 81.7                           | 14.2                    | 77,679,856 - 169,719,924        | 92,040,068                     |
| m657       | PHM532.23    | 5   | 101.9 | 193,208,486    | 23   | 70   | 3.04  | 8.51   | 1.7E-28         | 0.02                  | 90.2 - 114.0                          | 23.8                    | 179,952,918 - 207,274,028       | 27,321,110                     |
| m694       | PZA00355.2   | 6   | 11.1  | 78,756,246     | 23   | 46   | 2.02  | 5.65   | 1.4E-16         | 0.01                  | 0 - 22.1                              | 22.1                    | 9,561,985 - 95,788,878          | 86,226,893                     |
| m707       | PZB01658.1   | 6   | 28.7  | 102,953,989    | 23   | 22   | 0.98  | 2.73   | 1.7E-05         | 0.01                  | 11.8 - 28.7                           | 16.9                    | 82,066,479 - 102,953,989        | 20,887,510                     |
| m729       | PZA02187.1/2 | 6   | 54    | 139,105,837    | 23   | 42   | 1.84  | 5.16   | 1.3E-14         | 0.01                  | 50.0 - 55.7                           | 5.7                     | 131,405,672 - 142,648,551       | 11,242,879                     |
| m757       | PZA00910.1   | 6   | 106.6 | 166,688,135    | 23   | 33   | 1.45  | 4.06   | 2.8E-10         | 0.01                  | 94.0 - 109.7                          | 15.7                    | 163,119,951 - 167,884,169       | 4,764,218                      |
| m802       | PZA03583.1   | 7   | 69.8  | 128,404,190    | 23   | 30   | 1.31  | 3.68   | 7.4E-09         | 0.01                  | 61.4 - 81.2                           | 19.8                    | 121,400,796 - 143,285,623       | 21,884,827                     |
| m820       | PZA02386.2   | 7   | 95.2  | 154,593,844    | 23   | 57   | 2.50  | 7.00   | 4.1E-22         | 0.02                  | 95.2 - 112.3                          | 17.1                    | 143,285,623 - 162,173,913       | 18,888,290                     |
| m872       | PZA01470.1   | 8   | 53.9  | 72,801,634     | 23   | 76   | 3.30  | 9.23   | 1.5E-31         | 0.02                  | 52.7 - 54.7                           | 2.0                     | 64,422,612 - 82,582,808         | 18,160,196                     |
| m912       | PZA03651.1   | 8   | 76.1  | 146,342,392    | 23   | 32   | 1.38  | 3.85   | 1.7E-09         | 0.01                  | 64.1 - 88.5                           | 24.4                    | 118,438,603 - 159,897,609       | 41,459,006                     |
| m930       | PZA00362.1   | 8   | 96.5  | 163,939,260    | 23   | 26   | 1.14  | 3.19   | 4.2E-07         | 0.01                  | 95.6 - 106.9                          | 11.3                    | 163,565,258 - 166,984,210       | 3,418,952                      |
| m963       | PZB00540.3   | 9   | 40    | 23,217,547     | 23   | 31   | 1.33  | 3.71   | 5.5E-09         | 0.01                  | 30.4 - 44.6                           | 14.2                    | 16,979,604 - 37,421,647         | 20,442,043                     |
| m1009      | PHM1766.1    | 9   | 74    | 136,401,562    | 23   | 90   | 3.91  | 10.94  | 7.1E-39         | 0.03                  | 62.2 - 89.3                           | 27.1                    | 124,619,263 - 142,925,131       | 18,305,868                     |
| m1039      | PZB01301.5   | 10  | 26.8  | 9,747,844      | 23   | 37   | 1.60  | 4.49   | 6.1E-12         | 0.01                  | 15.2 - 40.1                           | 24.9                    | 5,118,792 - 84,002,545          | 78,883,753                     |
| m1084      | PZA02320.1   | 10  | 56.1  | 132,256,686    | 23   | 164  | 7.15  | 20.01  | 1.1E-77         | 0.05                  | 43.4 - 69.2                           | 25.8                    | 99,471,497 - 139,616,869        | 40,145,372                     |
| m1106      | PZA02527.2   | 10  | 101.9 | 148,488,798    | 23   | 29   | 1.25  | 3.51   | 3.1E-08         | 0.01                  | 101.9                                 | 0.0                     | 0.0                             | -                              |
| Population |              |     |       |                | 22   | 878  | 39.92 | 111.70 | 0               | 0.26                  |                                       | 14.44230769             |                                 |                                |
| Error      |              |     |       |                | 3694 | 1320 | 0.36  |        |                 |                       |                                       |                         |                                 |                                |

<sup>a</sup> *P*<0.05 support interval for each QTL

Table S4: NAM joint-linkage mapping analysis summary for percent oil content on a dry matter basis.

| QTL        | Marker ID   | Chr | cM    | AGP_v1<br>(bp) | SS   | df  | MS    | F      | P-value  | R <sup>2</sup> | Support interval<br>(cM) <sup>a</sup> | Interval Length<br>(cM) | Support Interval<br>AGP_v1 (bp) | Interval Length<br>AGP_v1 (bp) |
|------------|-------------|-----|-------|----------------|------|-----|-------|--------|----------|----------------|---------------------------------------|-------------------------|---------------------------------|--------------------------------|
| m23        | PZA02393.2  | 1   | 33.1  | 16,530,728     | 23   | 11  | 0.49  | 6.41   | 1.03E-19 | 0.01           | 21.9 - 47.3                           | 25.4                    | 10,934,471 - 28,526,284         | 17,591,813                     |
| m94        | PHM5480.17  | 1   | 116.5 | 204,199,175    | 23   | 13  | 0.57  | 7.41   | 7.55E-24 | 0.01           | 116.2 - 123.7                         | 7.5                     | 203,035,528 - 212,356,112       | 9,320,584                      |
| m118       | PZA03301.2  | 1   | 141.9 | 240,574,106    | 23   | 5   | 0.23  | 3.05   | 1.38E-06 | 0.01           | 127.6 - 153.4                         | 25.8                    | 216,926,935 - 257,414,765       | 40,487,830                     |
| m170       | PZA00856.2  | 1   | 199.4 | 295,785,390    | 23   | 10  | 0.46  | 5.93   | 9.92E-18 | 0.01           | 197.2 - 202.4                         | 5.2                     | 294,646,513 - 298,082,932       | 3,436,419                      |
| m221       | PZA01993.7  | 2   | 64.2  | -              | 23   | 8   | 0.33  | 4.30   | 3.30E-11 | 0.01           | 52.0 - 72.1                           | 20.1                    | 21,203,379 - 51,780,232         | 30,576,853                     |
| m240       | PZA02626.1  | 2   | 79.8  | 144,527,767    | 23   | 14  | 0.59  | 7.66   | 6.75E-25 | 0.01           | 76.5 - 84.2                           | 7.7                     | 103,493,675 - 170,899,948       | 67,406,273                     |
| m266       | PHM3668.12  | 2   | 106.1 | 195,555,727    | 23   | 6   | 0.24  | 3.17   | 5.16E-07 | 0.01           | 105.3 - 107.1                         | 1.8                     | 193,997,108 - 197,109,711       | 3,112,603                      |
| m330       | PZA03070.9  | 3   | 56.0  | 43,868,335     | 23   | 8   | 0.34  | 4.42   | 1.08E-11 | 0.01           | 54.7 - 61.8                           | 7.1                     | 31,695,641 - 132,192,350        | 100,496,709                    |
| m401       | PZA01457.1  | 3   | 104.0 | 196,870,259    | 23   | 10  | 0.45  | 5.80   | 3.41E-17 | 0.01           | 96.7 - 120.7                          | 24.0                    | 185,290,988 - 210,161,705       | 24,870,717                     |
| m474       | PZA03203.2  | 4   | 57.4  | 90,204,048     | 23   | 14  | 0.61  | 7.92   | 5.17E-26 | 0.01           | 56.3 - 61.8                           | 5.5                     | 76,123,299 - 148,400,968        | 72,277,669                     |
| m492       | PHM3155.14  | 4   | 78.4  | 170,467,696    | 23   | 7   | 0.30  | 3.92   | 9.49E-10 | 0.01           | 77.2 - 93.2                           | 16.0                    | 169,608,734 - 180,309,837       | 10,701,103                     |
| m538       | PHM4125.11  | 4   | 129.3 | 242,313,396    | 23   | 7   | 0.29  | 3.78   | 3.19E-09 | 0.01           | 0                                     | 0.0                     | 0.00                            | -                              |
| m553       | PHM13122.43 | 5   | 13.3  | 4,191,020      | 23   | 5   | 0.22  | 2.83   | 8.03E-06 | 0.01           | 7.2 - 30.3                            | 23.1                    | 2,690,777 - 8,220,095           | 5,529,318                      |
| m565       | PZA01284.6  | 5   | 37.9  | 11,989,892     | 23   | 7   | 0.31  | 4.04   | 3.33E-10 | 0.01           | 30.2 - 51.8                           | 21.6                    | 7,945,833 - 21,771,520          | 13,825,687                     |
| m591       | PZA02207.1  | 5   | 60.6  | 49,203,578     | 23   | 24  | 1.03  | 13.35  | 2.95E-49 | 0.02           | 58.0 - 63.6                           | 5.6                     | 34,587,147 - 61,405,377         | 26,818,230                     |
| m638       | PZA03714.1  | 5   | 87.2  | 175,463,122    | 23   | 6   | 0.26  | 3.34   | 1.23E-07 | 0.01           | 87.2 - 99.3                           | 12.1                    | 175,460,187 - 190,025,819       | 14,565,632                     |
| m708       | PZA03461.1  | 6   | 33.4  | 107,548,161    | 23   | 41  | 1.80  | 23.43  | 2.89E-92 | 0.04           | 18.6 - 42.1                           | 23.5                    | 91,704,263 - 117,238,757        | 25,534,494                     |
| m739       | PZA01342.2  | 6   | 61.4  | 148,798,933    | 23   | 6   | 0.26  | 3.35   | 1.18E-07 | 0.01           | 54.7 - 61.8                           | 7.1                     | 141,111,493 - 149,251,127       | 8,139,634                      |
| m793       | PZA02236.1  | 7   | 51.2  | 101,321,689    | 23   | 5   | 0.23  | 2.95   | 2.97E-06 | 0.01           | 49.1 - 64.9                           | 15.8                    | 46,238,062 - 124,599,116        | 78,361,054                     |
| m918       | PHM15278.6  | 8   | 82.3  | 155,483,712    | 23   | 16  | 0.72  | 9.30   | 6.97E-32 | 0.02           | 76.1 - 88.2                           | 12.1                    | 146,341,811 - 159,478,175       | 13,136,364                     |
| m995       | PZA02325.4  | 9   | 57.7  | 117,870,517    | 23   | 12  | 0.52  | 6.78   | 3.29E-21 | 0.01           | 57.3 - 64.3                           | 7.0                     | 116,763,624 - 128,514,657       | 11,751,033                     |
| m1085      | PZB01111.8  | 10  | 58.4  | 134,034,340    | 23   | 8   | 0.36  | 4.62   | 1.81E-12 | 0.01           | 44.8 - 58.4                           | 13.6                    | 111,608,632 - 134,034,340       | 22,425,708                     |
| Population |             |     |       |                | 22   | 428 | 19.43 | 252.75 | 0        | 0.44           |                                       | 13.1                    |                                 |                                |
| Error      |             |     |       |                | 3786 | 291 | 0.08  |        |          |                |                                       |                         |                                 |                                |

<sup>a</sup> P<0.05 support interval for each QTL

Table S5: NAM joint-linkage mapping analysis QTL allelic effects summary for percent starch content on a dry matter basis.

| Trait  | QTL | Population | Effect <sup>a</sup><br>(%) | Raw<br><i>P-value</i> | FDR<br><i>P-value</i> |
|--------|-----|------------|----------------------------|-----------------------|-----------------------|
| Starch | m15 | B97        | -0.07                      | 0.478                 | 0.669                 |
| Starch | m15 | CML103     | -0.25                      | 0.006                 | 0.028*                |
| Starch | m15 | CML228     | 0.20                       | 0.022                 | 0.073                 |
| Starch | m15 | CML247     | -0.10                      | 0.265                 | 0.432                 |
| Starch | m15 | CML277     | -0.08                      | 0.371                 | 0.548                 |
| Starch | m15 | CML322     | -0.13                      | 0.132                 | 0.264                 |
| Starch | m15 | CML333     | 0.11                       | 0.197                 | 0.352                 |
| Starch | m15 | CML52      | -0.13                      | 0.126                 | 0.256                 |
| Starch | m15 | CML69      | -0.21                      | 0.019                 | 0.062                 |
| Starch | m15 | HP301      | -0.11                      | 0.204                 | 0.362                 |
| Starch | m15 | Ki11       | -0.14                      | 0.124                 | 0.256                 |
| Starch | m15 | Ki3        | 0.00                       | 1.000                 | 1.000                 |
| Starch | m15 | Ky21       | -0.02                      | 0.817                 | 0.910                 |
| Starch | m15 | M162W      | -0.13                      | 0.164                 | 0.306                 |
| Starch | m15 | M37W       | -0.13                      | 0.124                 | 0.256                 |
| Starch | m15 | Mo18W      | -0.08                      | 0.358                 | 0.533                 |
| Starch | m15 | MS71       | -0.16                      | 0.058                 | 0.147                 |
| Starch | m15 | NC350      | 0.04                       | 0.664                 | 0.814                 |
| Starch | m15 | NC358      | -0.26                      | 0.004                 | 0.021*                |
| Starch | m15 | Oh43       | 0.15                       | 0.104                 | 0.225                 |
| Starch | m15 | Oh7B       | -0.22                      | 0.018                 | 0.060                 |
| Starch | m15 | Tx303      | -0.30                      | 0.001                 | 0.006*                |
| Starch | m15 | Tzi8       | -0.16                      | 0.073                 | 0.176                 |
| Starch | m57 | B97        | -0.24                      | 0.007                 | 0.031*                |
| Starch | m57 | CML103     | -0.32                      | 0.000                 | 0.004*                |
| Starch | m57 | CML228     | -0.03                      | 0.716                 | 0.850                 |
| Starch | m57 | CML247     | -0.31                      | 0.000                 | 0.004*                |
| Starch | m57 | CML277     | -0.17                      | 0.056                 | 0.146                 |
| Starch | m57 | CML322     | -0.27                      | 0.002                 | 0.013*                |
| Starch | m57 | CML333     | -0.17                      | 0.058                 | 0.147                 |
| Starch | m57 | CML52      | -0.06                      | 0.523                 | 0.705                 |
| Starch | m57 | CML69      | -0.25                      | 0.007                 | 0.030*                |
| Starch | m57 | HP301      | -0.52                      | 0.000                 | 0.001**               |
| Starch | m57 | Ki11       | -0.02                      | 0.851                 | 0.932                 |
| Starch | m57 | Ki3        | -0.24                      | 0.033                 | 0.098                 |
| Starch | m57 | Ky21       | -0.20                      | 0.034                 | 0.099                 |

Table S5: (continued...Starch)

| Trait  | QTL  | Population | Effect <sup>a</sup><br>(%) | Raw<br><i>P-value</i> | FDR<br><i>P-value</i> |
|--------|------|------------|----------------------------|-----------------------|-----------------------|
| Starch | m57  | M162W      | 0.20                       | 0.032                 | 0.096                 |
| Starch | m57  | M37W       | -0.18                      | 0.052                 | 0.137                 |
| Starch | m57  | Mo18W      | -0.34                      | 0.000                 | 0.001**               |
| Starch | m57  | MS71       | -0.37                      | 0.000                 | 0.001**               |
| Starch | m57  | NC350      | 0.08                       | 0.386                 | 0.567                 |
| Starch | m57  | NC358      | -0.06                      | 0.481                 | 0.671                 |
| Starch | m57  | Oh43       | -0.03                      | 0.778                 | 0.886                 |
| Starch | m57  | Oh7B       | -0.28                      | 0.002                 | 0.015*                |
| Starch | m57  | Tx303      | 0.13                       | 0.177                 | 0.323                 |
| Starch | m57  | Tzi8       | -0.12                      | 0.183                 | 0.332                 |
| Starch | m120 | B97        | -0.01                      | 0.916                 | 0.960                 |
| Starch | m120 | CML103     | -0.12                      | 0.174                 | 0.321                 |
| Starch | m120 | CML228     | -0.32                      | 0.000                 | 0.003*                |
| Starch | m120 | CML247     | -0.15                      | 0.079                 | 0.184                 |
| Starch | m120 | CML277     | 0.10                       | 0.248                 | 0.408                 |
| Starch | m120 | CML322     | -0.26                      | 0.003                 | 0.018*                |
| Starch | m120 | CML333     | 0.03                       | 0.735                 | 0.860                 |
| Starch | m120 | CML52      | -0.09                      | 0.327                 | 0.505                 |
| Starch | m120 | CML69      | -0.01                      | 0.944                 | 0.975                 |
| Starch | m120 | HP301      | -0.32                      | 0.000                 | 0.003*                |
| Starch | m120 | Ki11       | 0.05                       | 0.551                 | 0.726                 |
| Starch | m120 | Ki3        | -0.40                      | 0.000                 | 0.003*                |
| Starch | m120 | Ky21       | 0.05                       | 0.608                 | 0.766                 |
| Starch | m120 | M162W      | 0.21                       | 0.017                 | 0.057                 |
| Starch | m120 | M37W       | -0.04                      | 0.645                 | 0.802                 |
| Starch | m120 | Mo18W      | 0.00                       | 0.980                 | 0.984                 |
| Starch | m120 | MS71       | -0.20                      | 0.027                 | 0.084                 |
| Starch | m120 | NC350      | 0.00                       | 0.967                 | 0.980                 |
| Starch | m120 | NC358      | -0.12                      | 0.200                 | 0.356                 |
| Starch | m120 | Oh43       | -0.05                      | 0.562                 | 0.733                 |
| Starch | m120 | Oh7B       | -0.01                      | 0.887                 | 0.936                 |
| Starch | m120 | Tx303      | 0.34                       | 0.000                 | 0.003*                |
| Starch | m120 | Tzi8       | -0.06                      | 0.478                 | 0.669                 |
| Starch | m187 | B97        | 0.09                       | 0.275                 | 0.441                 |
| Starch | m187 | CML103     | 0.00                       | 0.958                 | 0.980                 |
| Starch | m187 | CML228     | 0.11                       | 0.209                 | 0.366                 |
| Starch | m187 | CML247     | 0.13                       | 0.147                 | 0.286                 |

Table S5: (continued...Starch)

| Trait  | QTL  | Population | Effect <sup>a</sup><br>(%) | Raw<br><i>P-value</i> | FDR<br><i>P-value</i> |
|--------|------|------------|----------------------------|-----------------------|-----------------------|
| Starch | m187 | CML277     | -0.01                      | 0.932                 | 0.971                 |
| Starch | m187 | CML322     | -0.46                      | 0.000                 | 0.001**               |
| Starch | m187 | CML333     | 0.01                       | 0.882                 | 0.936                 |
| Starch | m187 | CML52      | -0.14                      | 0.099                 | 0.217                 |
| Starch | m187 | CML69      | -0.17                      | 0.076                 | 0.180                 |
| Starch | m187 | HP301      | -0.30                      | 0.001                 | 0.007*                |
| Starch | m187 | Ki11       | 0.05                       | 0.556                 | 0.727                 |
| Starch | m187 | Ki3        | -0.41                      | 0.000                 | 0.004*                |
| Starch | m187 | Ky21       | 0.00                       | 0.971                 | 0.980                 |
| Starch | m187 | M162W      | -0.18                      | 0.056                 | 0.145                 |
| Starch | m187 | M37W       | -0.10                      | 0.244                 | 0.403                 |
| Starch | m187 | Mo18W      | -0.28                      | 0.002                 | 0.011*                |
| Starch | m187 | MS71       | -0.11                      | 0.216                 | 0.371                 |
| Starch | m187 | NC350      | -0.16                      | 0.084                 | 0.192                 |
| Starch | m187 | NC358      | -0.17                      | 0.057                 | 0.146                 |
| Starch | m187 | Oh43       | -0.05                      | 0.542                 | 0.717                 |
| Starch | m187 | Oh7B       | 0.06                       | 0.475                 | 0.668                 |
| Starch | m187 | Tx303      | -0.08                      | 0.422                 | 0.607                 |
| Starch | m187 | Tzi8       | 0.02                       | 0.801                 | 0.900                 |
| Starch | m232 | B97        | 0.20                       | 0.034                 | 0.099                 |
| Starch | m232 | CML103     | 0.02                       | 0.858                 | 0.934                 |
| Starch | m232 | CML228     | 0.02                       | 0.835                 | 0.921                 |
| Starch | m232 | CML247     | -0.45                      | 0.000                 | 0.001**               |
| Starch | m232 | CML277     | 0.10                       | 0.272                 | 0.438                 |
| Starch | m232 | CML322     | 0.25                       | 0.008                 | 0.032*                |
| Starch | m232 | CML333     | 0.04                       | 0.713                 | 0.850                 |
| Starch | m232 | CML52      | -0.11                      | 0.254                 | 0.415                 |
| Starch | m232 | CML69      | 0.14                       | 0.153                 | 0.291                 |
| Starch | m232 | HP301      | -0.34                      | 0.000                 | 0.003                 |
| Starch | m232 | Ki11       | 0.01                       | 0.948                 | 0.975                 |
| Starch | m232 | Ki3        | 0.29                       | 0.009                 | 0.038*                |
| Starch | m232 | Ky21       | -0.03                      | 0.758                 | 0.869                 |
| Starch | m232 | M162W      | 0.04                       | 0.711                 | 0.850                 |
| Starch | m232 | M37W       | 0.07                       | 0.491                 | 0.679                 |
| Starch | m232 | Mo18W      | 0.28                       | 0.004                 | 0.021*                |
| Starch | m232 | MS71       | 0.16                       | 0.118                 | 0.247                 |
| Starch | m232 | NC350      | -0.18                      | 0.051                 | 0.135                 |

Table S5: (continued...Starch)

| Trait  | QTL  | Population | Effect <sup>a</sup><br>(%) | Raw<br><i>P-value</i> | FDR<br><i>P-value</i> |
|--------|------|------------|----------------------------|-----------------------|-----------------------|
| Starch | m232 | NC358      | 0.09                       | 0.288                 | 0.454                 |
| Starch | m232 | Oh43       | 0.05                       | 0.599                 | 0.765                 |
| Starch | m232 | Oh7B       | -0.12                      | 0.272                 | 0.438                 |
| Starch | m232 | Tx303      | -0.25                      | 0.009                 | 0.036*                |
| Starch | m232 | Tzi8       | -0.11                      | 0.314                 | 0.488                 |
| Starch | m264 | B97        | 0.15                       | 0.122                 | 0.252                 |
| Starch | m264 | CML103     | -0.12                      | 0.215                 | 0.371                 |
| Starch | m264 | CML228     | 0.02                       | 0.800                 | 0.900                 |
| Starch | m264 | CML247     | 0.13                       | 0.207                 | 0.363                 |
| Starch | m264 | CML277     | -0.27                      | 0.004                 | 0.020*                |
| Starch | m264 | CML322     | 0.14                       | 0.135                 | 0.267                 |
| Starch | m264 | CML333     | -0.28                      | 0.003                 | 0.018*                |
| Starch | m264 | CML52      | -0.02                      | 0.855                 | 0.932                 |
| Starch | m264 | CML69      | -0.07                      | 0.439                 | 0.629                 |
| Starch | m264 | HP301      | -0.17                      | 0.081                 | 0.188                 |
| Starch | m264 | Ki11       | -0.11                      | 0.283                 | 0.449                 |
| Starch | m264 | Ki3        | -0.62                      | 0.000                 | 0.001**               |
| Starch | m264 | Ky21       | 0.00                       | 0.967                 | 0.980                 |
| Starch | m264 | M162W      | -0.16                      | 0.105                 | 0.227                 |
| Starch | m264 | M37W       | -0.04                      | 0.699                 | 0.842                 |
| Starch | m264 | Mo18W      | 0.03                       | 0.715                 | 0.850                 |
| Starch | m264 | MS71       | -0.21                      | 0.040                 | 0.112                 |
| Starch | m264 | NC350      | 0.26                       | 0.007                 | 0.030*                |
| Starch | m264 | NC358      | -0.13                      | 0.215                 | 0.371                 |
| Starch | m264 | Oh43       | 0.06                       | 0.563                 | 0.733                 |
| Starch | m264 | Oh7B       | -0.01                      | 0.921                 | 0.963                 |
| Starch | m264 | Tx303      | -0.13                      | 0.175                 | 0.321                 |
| Starch | m264 | Tzi8       | 0.01                       | 0.965                 | 0.980                 |
| Starch | m353 | B97        | -0.04                      | 0.693                 | 0.837                 |
| Starch | m353 | CML103     | 0.27                       | 0.002                 | 0.012*                |
| Starch | m353 | CML228     | 0.28                       | 0.002                 | 0.014*                |
| Starch | m353 | CML247     | 0.03                       | 0.736                 | 0.860                 |
| Starch | m353 | CML277     | 0.16                       | 0.079                 | 0.184                 |
| Starch | m353 | CML322     | -0.12                      | 0.160                 | 0.300                 |
| Starch | m353 | CML333     | 0.01                       | 0.880                 | 0.936                 |
| Starch | m353 | CML52      | -0.03                      | 0.715                 | 0.850                 |
| Starch | m353 | CML69      | -0.04                      | 0.664                 | 0.814                 |

Table S5: (continued...Starch)

| Trait  | QTL  | Population | Effect <sup>a</sup><br>(%) | Raw<br><i>P-value</i> | FDR<br><i>P-value</i> |
|--------|------|------------|----------------------------|-----------------------|-----------------------|
| Starch | m353 | HP301      | -0.55                      | 0.000                 | 0.001**               |
| Starch | m353 | Ki11       | 0.05                       | 0.522                 | 0.705                 |
| Starch | m353 | Ki3        | 0.03                       | 0.801                 | 0.900                 |
| Starch | m353 | Ky21       | 0.19                       | 0.032                 | 0.096                 |
| Starch | m353 | M162W      | 0.16                       | 0.094                 | 0.209                 |
| Starch | m353 | M37W       | -0.17                      | 0.062                 | 0.154                 |
| Starch | m353 | Mo18W      | -0.04                      | 0.653                 | 0.807                 |
| Starch | m353 | MS71       | 0.02                       | 0.792                 | 0.896                 |
| Starch | m353 | NC350      | -0.26                      | 0.003                 | 0.019*                |
| Starch | m353 | NC358      | -0.14                      | 0.135                 | 0.267                 |
| Starch | m353 | Oh43       | -0.20                      | 0.025                 | 0.078                 |
| Starch | m353 | Oh7B       | -0.04                      | 0.650                 | 0.807                 |
| Starch | m353 | Tx303      | 0.02                       | 0.803                 | 0.900                 |
| Starch | m353 | Tzi8       | 0.43                       | 0.000                 | 0.001**               |
| Starch | m409 | B97        | -0.05                      | 0.600                 | 0.765                 |
| Starch | m409 | CML103     | -0.22                      | 0.015                 | 0.054                 |
| Starch | m409 | CML228     | -0.09                      | 0.332                 | 0.511                 |
| Starch | m409 | CML247     | -0.35                      | 0.000                 | 0.003*                |
| Starch | m409 | CML277     | -0.14                      | 0.193                 | 0.347                 |
| Starch | m409 | CML322     | -0.06                      | 0.533                 | 0.717                 |
| Starch | m409 | CML333     | -0.25                      | 0.012                 | 0.045*                |
| Starch | m409 | CML52      | 0.02                       | 0.852                 | 0.932                 |
| Starch | m409 | CML69      | -0.25                      | 0.009                 | 0.038*                |
| Starch | m409 | HP301      | -0.11                      | 0.243                 | 0.403                 |
| Starch | m409 | Ki11       | -0.11                      | 0.222                 | 0.379                 |
| Starch | m409 | Ki3        | -0.42                      | 0.000                 | 0.003*                |
| Starch | m409 | Ky21       | -0.19                      | 0.050                 | 0.134                 |
| Starch | m409 | M162W      | 0.00                       | 0.966                 | 0.980                 |
| Starch | m409 | M37W       | -0.13                      | 0.207                 | 0.363                 |
| Starch | m409 | Mo18W      | -0.01                      | 0.897                 | 0.942                 |
| Starch | m409 | MS71       | 0.01                       | 0.933                 | 0.971                 |
| Starch | m409 | NC350      | -0.06                      | 0.536                 | 0.717                 |
| Starch | m409 | NC358      | -0.20                      | 0.067                 | 0.163                 |
| Starch | m409 | Oh43       | -0.17                      | 0.083                 | 0.191                 |
| Starch | m409 | Oh7B       | -0.21                      | 0.038                 | 0.109                 |
| Starch | m409 | Tx303      | -0.25                      | 0.013                 | 0.048*                |
| Starch | m409 | Tzi8       | -0.14                      | 0.157                 | 0.296                 |

Table S5: (continued...Starch)

| Trait  | QTL  | Population | Effect <sup>a</sup><br>(%) | Raw<br><i>P-value</i> | FDR<br><i>P-value</i> |
|--------|------|------------|----------------------------|-----------------------|-----------------------|
| Starch | m426 | B97        | 0.10                       | 0.291                 | 0.457                 |
| Starch | m426 | CML103     | 0.43                       | 0.000                 | 0.001**               |
| Starch | m426 | CML228     | 0.19                       | 0.051                 | 0.135                 |
| Starch | m426 | CML247     | 0.14                       | 0.125                 | 0.256                 |
| Starch | m426 | CML277     | -0.09                      | 0.345                 | 0.522                 |
| Starch | m426 | CML322     | 0.25                       | 0.007                 | 0.031*                |
| Starch | m426 | CML333     | 0.13                       | 0.149                 | 0.287                 |
| Starch | m426 | CML52      | -0.06                      | 0.454                 | 0.645                 |
| Starch | m426 | CML69      | 0.50                       | 0.000                 | 0.001**               |
| Starch | m426 | HP301      | 0.17                       | 0.062                 | 0.154                 |
| Starch | m426 | Ki11       | -0.05                      | 0.595                 | 0.765                 |
| Starch | m426 | Ki3        | -0.09                      | 0.419                 | 0.605                 |
| Starch | m426 | Ky21       | 0.29                       | 0.003                 | 0.015*                |
| Starch | m426 | M162W      | 0.10                       | 0.276                 | 0.441                 |
| Starch | m426 | M37W       | 0.07                       | 0.507                 | 0.694                 |
| Starch | m426 | Mo18W      | 0.16                       | 0.080                 | 0.185                 |
| Starch | m426 | MS71       | 0.12                       | 0.226                 | 0.384                 |
| Starch | m426 | NC350      | 0.13                       | 0.154                 | 0.292                 |
| Starch | m426 | NC358      | 0.10                       | 0.340                 | 0.520                 |
| Starch | m426 | Oh43       | 0.01                       | 0.943                 | 0.975                 |
| Starch | m426 | Oh7B       | 0.24                       | 0.016                 | 0.055                 |
| Starch | m426 | Tx303      | 0.22                       | 0.017                 | 0.057                 |
| Starch | m426 | Tzi8       | 0.23                       | 0.017                 | 0.057                 |
| Starch | m540 | B97        | 0.22                       | 0.014                 | 0.049*                |
| Starch | m540 | CML103     | -0.07                      | 0.413                 | 0.598                 |
| Starch | m540 | CML228     | 0.29                       | 0.001                 | 0.005*                |
| Starch | m540 | CML247     | 0.05                       | 0.582                 | 0.750                 |
| Starch | m540 | CML277     | 0.13                       | 0.165                 | 0.307                 |
| Starch | m540 | CML322     | 0.07                       | 0.484                 | 0.672                 |
| Starch | m540 | CML333     | 0.08                       | 0.391                 | 0.572                 |
| Starch | m540 | CML52      | 0.00                       | 0.974                 | 0.980                 |
| Starch | m540 | CML69      | 0.20                       | 0.031                 | 0.095                 |
| Starch | m540 | HP301      | 0.06                       | 0.484                 | 0.672                 |
| Starch | m540 | Ki11       | 0.06                       | 0.499                 | 0.686                 |
| Starch | m540 | Ki3        | -0.33                      | 0.002                 | 0.014*                |
| Starch | m540 | Ky21       | 0.26                       | 0.004                 | 0.019*                |
| Starch | m540 | M162W      | 0.16                       | 0.063                 | 0.155                 |



Table S5: (continued...Starch)

| Trait  | QTL  | Population | Effect <sup>a</sup><br>(%) | Raw<br><i>P-value</i> | FDR<br><i>P-value</i> |
|--------|------|------------|----------------------------|-----------------------|-----------------------|
| Starch | m540 | M37W       | 0.10                       | 0.243                 | 0.403                 |
| Starch | m540 | Mo18W      | 0.13                       | 0.147                 | 0.286                 |
| Starch | m540 | MS71       | -0.14                      | 0.118                 | 0.247                 |
| Starch | m540 | NC350      | 0.20                       | 0.024                 | 0.077                 |
| Starch | m540 | NC358      | 0.25                       | 0.007                 | 0.030*                |
| Starch | m540 | Oh43       | 0.02                       | 0.844                 | 0.929                 |
| Starch | m540 | Oh7B       | 0.27                       | 0.004                 | 0.022*                |
| Starch | m540 | Tx303      | 0.08                       | 0.400                 | 0.582                 |
| Starch | m540 | Tzi8       | 0.16                       | 0.090                 | 0.202                 |
| Starch | m619 | B97        | 0.03                       | 0.754                 | 0.867                 |
| Starch | m619 | CML103     | -0.01                      | 0.939                 | 0.975                 |
| Starch | m619 | CML228     | -0.25                      | 0.009                 | 0.038*                |
| Starch | m619 | CML247     | -0.25                      | 0.007                 | 0.031*                |
| Starch | m619 | CML277     | -0.16                      | 0.074                 | 0.176                 |
| Starch | m619 | CML322     | -0.44                      | 0.000                 | 0.001**               |
| Starch | m619 | CML333     | -0.23                      | 0.013                 | 0.048*                |
| Starch | m619 | CML52      | 0.12                       | 0.172                 | 0.318                 |
| Starch | m619 | CML69      | -0.32                      | 0.000                 | 0.003*                |
| Starch | m619 | HP301      | 0.56                       | 0.000                 | 0.001**               |
| Starch | m619 | Ki11       | -0.14                      | 0.129                 | 0.260                 |
| Starch | m619 | Ki3        | -0.19                      | 0.085                 | 0.193                 |
| Starch | m619 | Ky21       | -0.02                      | 0.814                 | 0.910                 |
| Starch | m619 | M162W      | -0.06                      | 0.569                 | 0.738                 |
| Starch | m619 | M37W       | -0.09                      | 0.345                 | 0.522                 |
| Starch | m619 | Mo18W      | -0.04                      | 0.693                 | 0.837                 |
| Starch | m619 | MS71       | 0.06                       | 0.497                 | 0.686                 |
| Starch | m619 | NC350      | -0.07                      | 0.462                 | 0.653                 |
| Starch | m619 | NC358      | 0.04                       | 0.652                 | 0.807                 |
| Starch | m619 | Oh43       | 0.04                       | 0.688                 | 0.835                 |
| Starch | m619 | Oh7B       | 0.18                       | 0.070                 | 0.170                 |
| Starch | m619 | Tx303      | 0.40                       | 0.000                 | 0.001*                |
| Starch | m619 | Tzi8       | -0.40                      | 0.000                 | 0.001**               |
| Starch | m650 | B97        | -0.27                      | 0.007                 | 0.031*                |
| Starch | m650 | CML103     | -0.37                      | 0.000                 | 0.002*                |
| Starch | m650 | CML228     | -0.24                      | 0.016                 | 0.054                 |
| Starch | m650 | CML247     | -0.30                      | 0.001                 | 0.008*                |
| Starch | m650 | CML277     | -0.14                      | 0.104                 | 0.225                 |

Table S5: (continued...Starch)

| Trait  | QTL  | Population | Effect <sup>a</sup><br>(%) | Raw<br><i>P-value</i> | FDR<br><i>P-value</i> |
|--------|------|------------|----------------------------|-----------------------|-----------------------|
| Starch | m650 | CML322     | 0.03                       | 0.759                 | 0.869                 |
| Starch | m650 | CML333     | -0.41                      | 0.000                 | 0.001**               |
| Starch | m650 | CML52      | 0.06                       | 0.508                 | 0.694                 |
| Starch | m650 | CML69      | -0.50                      | 0.000                 | 0.001**               |
| Starch | m650 | HP301      | 0.05                       | 0.576                 | 0.743                 |
| Starch | m650 | Ki11       | -0.09                      | 0.295                 | 0.463                 |
| Starch | m650 | Ki3        | -0.23                      | 0.034                 | 0.099                 |
| Starch | m650 | Ky21       | -0.03                      | 0.752                 | 0.867                 |
| Starch | m650 | M162W      | 0.12                       | 0.214                 | 0.371                 |
| Starch | m650 | M37W       | -0.09                      | 0.336                 | 0.516                 |
| Starch | m650 | Mo18W      | 0.02                       | 0.866                 | 0.936                 |
| Starch | m650 | MS71       | -0.22                      | 0.022                 | 0.073                 |
| Starch | m650 | NC350      | -0.20                      | 0.030                 | 0.092                 |
| Starch | m650 | NC358      | -0.11                      | 0.242                 | 0.403                 |
| Starch | m650 | Oh43       | 0.01                       | 0.879                 | 0.936                 |
| Starch | m650 | Oh7B       | -0.38                      | 0.000                 | 0.002*                |
| Starch | m650 | Tx303      | -0.47                      | 0.000                 | 0.001**               |
| Starch | m650 | Tzi8       | -0.47                      | 0.000                 | 0.001**               |
| Starch | m696 | B97        | -0.15                      | 0.137                 | 0.270                 |
| Starch | m696 | CML103     | -0.15                      | 0.109                 | 0.234                 |
| Starch | m696 | CML228     | -0.26                      | 0.007                 | 0.031*                |
| Starch | m696 | CML247     | -0.19                      | 0.058                 | 0.147                 |
| Starch | m696 | CML277     | -0.22                      | 0.032                 | 0.096                 |
| Starch | m696 | CML322     | -0.06                      | 0.537                 | 0.717                 |
| Starch | m696 | CML333     | 0.11                       | 0.283                 | 0.449                 |
| Starch | m696 | CML52      | -0.04                      | 0.670                 | 0.818                 |
| Starch | m696 | CML69      | -0.14                      | 0.150                 | 0.287                 |
| Starch | m696 | HP301      | -0.08                      | 0.451                 | 0.645                 |
| Starch | m696 | Ki11       | -0.06                      | 0.521                 | 0.705                 |
| Starch | m696 | Ki3        | -0.15                      | 0.241                 | 0.403                 |
| Starch | m696 | Ky21       | 0.02                       | 0.865                 | 0.936                 |
| Starch | m696 | M162W      | -0.18                      | 0.092                 | 0.207                 |
| Starch | m696 | M37W       | 0.01                       | 0.949                 | 0.975                 |
| Starch | m696 | Mo18W      | -0.05                      | 0.642                 | 0.802                 |
| Starch | m696 | MS71       | -0.26                      | 0.006                 | 0.029*                |
| Starch | m696 | NC350      | -0.47                      | 0.000                 | 0.001**               |
| Starch | m696 | NC358      | -0.55                      | 0.000                 | 0.001**               |

Table S5: (continued...Starch)

| Trait  | QTL  | Population | Effect <sup>a</sup><br>(%) | Raw<br><i>P-value</i> | FDR<br><i>P-value</i> |
|--------|------|------------|----------------------------|-----------------------|-----------------------|
| Starch | m696 | Oh43       | 0.02                       | 0.881                 | 0.936                 |
| Starch | m696 | Oh7B       | 0.01                       | 0.948                 | 0.975                 |
| Starch | m696 | Tx303      | -0.20                      | 0.073                 | 0.176                 |
| Starch | m696 | Tzi8       | 0.03                       | 0.741                 | 0.860                 |
| Starch | m707 | B97        | -0.06                      | 0.541                 | 0.717                 |
| Starch | m707 | CML103     | -0.16                      | 0.096                 | 0.212                 |
| Starch | m707 | CML228     | -0.23                      | 0.015                 | 0.054                 |
| Starch | m707 | CML247     | 0.02                       | 0.854                 | 0.932                 |
| Starch | m707 | CML277     | 0.16                       | 0.118                 | 0.247                 |
| Starch | m707 | CML322     | -0.10                      | 0.347                 | 0.524                 |
| Starch | m707 | CML333     | -0.25                      | 0.012                 | 0.046*                |
| Starch | m707 | CML52      | 0.00                       | 0.997                 | 0.999                 |
| Starch | m707 | CML69      | -0.03                      | 0.740                 | 0.860                 |
| Starch | m707 | HP301      | 0.12                       | 0.283                 | 0.449                 |
| Starch | m707 | Ki11       | -0.02                      | 0.872                 | 0.936                 |
| Starch | m707 | Ki3        | -0.61                      | 0.000                 | 0.001**               |
| Starch | m707 | Ky21       | -0.15                      | 0.177                 | 0.323                 |
| Starch | m707 | M162W      | -0.21                      | 0.071                 | 0.172                 |
| Starch | m707 | M37W       | 0.00                       | 0.972                 | 0.980                 |
| Starch | m707 | Mo18W      | -0.23                      | 0.023                 | 0.075                 |
| Starch | m707 | MS71       | 0.16                       | 0.132                 | 0.264                 |
| Starch | m707 | NC350      | 0.00                       | 0.972                 | 0.980                 |
| Starch | m707 | NC358      | 0.34                       | 0.001                 | 0.005*                |
| Starch | m707 | Oh43       | 0.09                       | 0.407                 | 0.590                 |
| Starch | m707 | Oh7B       | -0.46                      | 0.000                 | 0.001**               |
| Starch | m707 | Tx303      | -0.27                      | 0.012                 | 0.044*                |
| Starch | m707 | Tzi8       | -0.15                      | 0.152                 | 0.289                 |
| Starch | m810 | B97        | -0.11                      | 0.318                 | 0.492                 |
| Starch | m810 | CML103     | -0.11                      | 0.348                 | 0.524                 |
| Starch | m810 | CML228     | 0.01                       | 0.897                 | 0.942                 |
| Starch | m810 | CML247     | -0.28                      | 0.004                 | 0.020*                |
| Starch | m810 | CML277     | 0.23                       | 0.034                 | 0.099                 |
| Starch | m810 | CML322     | -0.16                      | 0.127                 | 0.256                 |
| Starch | m810 | CML333     | -0.15                      | 0.148                 | 0.286                 |
| Starch | m810 | CML52      | -0.05                      | 0.671                 | 0.818                 |
| Starch | m810 | CML69      | 0.16                       | 0.089                 | 0.201                 |
| Starch | m810 | HP301      | -0.33                      | 0.001                 | 0.006*                |

Table S5: (continued...Starch)

| Trait  | QTL  | Population | Effect <sup>a</sup><br>(%) | Raw<br><i>P-value</i> | FDR<br><i>P-value</i> |
|--------|------|------------|----------------------------|-----------------------|-----------------------|
| Starch | m810 | Ki11       | -0.38                      | 0.001                 | 0.005*                |
| Starch | m810 | Ki3        | -0.33                      | 0.006                 | 0.029*                |
| Starch | m810 | Ky21       | -0.11                      | 0.271                 | 0.438                 |
| Starch | m810 | M162W      | -0.29                      | 0.003                 | 0.016*                |
| Starch | m810 | M37W       | -0.06                      | 0.607                 | 0.766                 |
| Starch | m810 | Mo18W      | -0.23                      | 0.032                 | 0.096                 |
| Starch | m810 | MS71       | -0.03                      | 0.739                 | 0.860                 |
| Starch | m810 | NC350      | 0.09                       | 0.361                 | 0.537                 |
| Starch | m810 | NC358      | -0.31                      | 0.001                 | 0.010*                |
| Starch | m810 | Oh43       | 0.04                       | 0.730                 | 0.860                 |
| Starch | m810 | Oh7B       | 0.21                       | 0.059                 | 0.148                 |
| Starch | m810 | Tx303      | -0.03                      | 0.745                 | 0.863                 |
| Starch | m810 | Tzi8       | -0.19                      | 0.074                 | 0.176                 |
| Starch | m820 | B97        | 0.30                       | 0.011                 | 0.042*                |
| Starch | m820 | CML103     | 0.43                       | 0.001                 | 0.004*                |
| Starch | m820 | CML228     | -0.02                      | 0.881                 | 0.936                 |
| Starch | m820 | CML247     | 0.47                       | 0.000                 | 0.001**               |
| Starch | m820 | CML277     | 0.07                       | 0.541                 | 0.717                 |
| Starch | m820 | CML322     | 0.07                       | 0.543                 | 0.717                 |
| Starch | m820 | CML333     | 0.36                       | 0.001                 | 0.007*                |
| Starch | m820 | CML52      | 0.23                       | 0.065                 | 0.160                 |
| Starch | m820 | CML69      | 0.22                       | 0.031                 | 0.095                 |
| Starch | m820 | HP301      | 0.51                       | 0.000                 | 0.001**               |
| Starch | m820 | Ki11       | 0.50                       | 0.000                 | 0.002*                |
| Starch | m820 | Ki3        | 0.28                       | 0.035                 | 0.103                 |
| Starch | m820 | Ky21       | 0.31                       | 0.003                 | 0.016*                |
| Starch | m820 | M162W      | 0.14                       | 0.188                 | 0.340                 |
| Starch | m820 | M37W       | -0.04                      | 0.719                 | 0.852                 |
| Starch | m820 | Mo18W      | 0.36                       | 0.002                 | 0.011*                |
| Starch | m820 | MS71       | 0.39                       | 0.000                 | 0.001*                |
| Starch | m820 | NC350      | 0.22                       | 0.056                 | 0.145                 |
| Starch | m820 | NC358      | 0.38                       | 0.000                 | 0.002*                |
| Starch | m820 | Oh43       | 0.17                       | 0.232                 | 0.394                 |
| Starch | m820 | Oh7B       | 0.11                       | 0.349                 | 0.524                 |
| Starch | m820 | Tx303      | 0.31                       | 0.003                 | 0.015*                |
| Starch | m820 | Tzi8       | 0.38                       | 0.000                 | 0.004*                |
| Starch | m860 | B97        | 0.06                       | 0.570                 | 0.738                 |

Table S5: (continued...Starch)

| Trait  | QTL  | Population | Effect <sup>a</sup><br>(%) | Raw<br><i>P-value</i> | FDR<br><i>P-value</i> |
|--------|------|------------|----------------------------|-----------------------|-----------------------|
| Starch | m860 | CML103     | 0.27                       | 0.005                 | 0.023*                |
| Starch | m860 | CML228     | 0.01                       | 0.886                 | 0.936                 |
| Starch | m860 | CML247     | -0.03                      | 0.735                 | 0.860                 |
| Starch | m860 | CML277     | -0.01                      | 0.868                 | 0.936                 |
| Starch | m860 | CML322     | 0.19                       | 0.037                 | 0.106                 |
| Starch | m860 | CML333     | 0.03                       | 0.752                 | 0.867                 |
| Starch | m860 | CML52      | 0.08                       | 0.344                 | 0.522                 |
| Starch | m860 | CML69      | 0.24                       | 0.009                 | 0.038*                |
| Starch | m860 | HP301      | 0.17                       | 0.051                 | 0.135                 |
| Starch | m860 | Ki11       | 0.11                       | 0.234                 | 0.395                 |
| Starch | m860 | Ki3        | 0.65                       | 0.000                 | 0.001*                |
| Starch | m860 | Ky21       | 0.28                       | 0.002                 | 0.014*                |
| Starch | m860 | M162W      | 0.06                       | 0.509                 | 0.694                 |
| Starch | m860 | M37W       | 0.30                       | 0.001                 | 0.005*                |
| Starch | m860 | Mo18W      | 0.03                       | 0.773                 | 0.882                 |
| Starch | m860 | MS71       | -0.11                      | 0.210                 | 0.366                 |
| Starch | m860 | NC350      | 0.27                       | 0.005                 | 0.024*                |
| Starch | m860 | NC358      | 0.26                       | 0.004                 | 0.022*                |
| Starch | m860 | Oh43       | 0.01                       | 0.884                 | 0.936                 |
| Starch | m860 | Oh7B       | 0.01                       | 0.956                 | 0.980                 |
| Starch | m860 | Tx303      | 0.25                       | 0.007                 | 0.031*                |
| Starch | m860 | Tzi8       | -0.02                      | 0.822                 | 0.911                 |
| Starch | m922 | B97        | 0.03                       | 0.791                 | 0.896                 |
| Starch | m922 | CML103     | -0.23                      | 0.014                 | 0.050                 |
| Starch | m922 | CML228     | -0.19                      | 0.039                 | 0.110                 |
| Starch | m922 | CML247     | 0.07                       | 0.460                 | 0.651                 |
| Starch | m922 | CML277     | 0.08                       | 0.398                 | 0.581                 |
| Starch | m922 | CML322     | -0.33                      | 0.000                 | 0.003*                |
| Starch | m922 | CML333     | -0.13                      | 0.127                 | 0.256                 |
| Starch | m922 | CML52      | -0.13                      | 0.142                 | 0.278                 |
| Starch | m922 | CML69      | -0.02                      | 0.832                 | 0.919                 |
| Starch | m922 | HP301      | -0.38                      | 0.000                 | 0.001**               |
| Starch | m922 | Ki11       | -0.22                      | 0.016                 | 0.055                 |
| Starch | m922 | Ki3        | 0.20                       | 0.086                 | 0.195                 |
| Starch | m922 | Ky21       | -0.10                      | 0.249                 | 0.409                 |
| Starch | m922 | M162W      | 0.23                       | 0.009                 | 0.038*                |
| Starch | m922 | M37W       | -0.09                      | 0.305                 | 0.475                 |

Table S5: (continued...Starch)

| Trait  | QTL  | Population | Effect <sup>a</sup><br>(%) | Raw<br><i>P-value</i> | FDR<br><i>P-value</i> |
|--------|------|------------|----------------------------|-----------------------|-----------------------|
| Starch | m922 | Mo18W      | -0.06                      | 0.554                 | 0.727                 |
| Starch | m922 | MS71       | -0.45                      | 0.000                 | 0.001**               |
| Starch | m922 | NC350      | -0.21                      | 0.024                 | 0.076                 |
| Starch | m922 | NC358      | 0.19                       | 0.050                 | 0.134                 |
| Starch | m922 | Oh43       | -0.06                      | 0.538                 | 0.717                 |
| Starch | m922 | Oh7B       | -0.16                      | 0.112                 | 0.238                 |
| Starch | m922 | Tx303      | -0.13                      | 0.139                 | 0.274                 |
| Starch | m922 | Tzi8       | 0.03                       | 0.782                 | 0.888                 |
| Starch | m968 | B97        | -0.17                      | 0.111                 | 0.237                 |
| Starch | m968 | CML103     | -0.13                      | 0.250                 | 0.409                 |
| Starch | m968 | CML228     | -0.05                      | 0.643                 | 0.802                 |
| Starch | m968 | CML247     | -0.22                      | 0.015                 | 0.054                 |
| Starch | m968 | CML277     | -0.27                      | 0.006                 | 0.027*                |
| Starch | m968 | CML322     | -0.13                      | 0.160                 | 0.300                 |
| Starch | m968 | CML333     | -0.26                      | 0.005                 | 0.023*                |
| Starch | m968 | CML52      | -0.02                      | 0.821                 | 0.911                 |
| Starch | m968 | CML69      | -0.25                      | 0.021                 | 0.070                 |
| Starch | m968 | HP301      | -0.26                      | 0.006                 | 0.029*                |
| Starch | m968 | Ki11       | -0.20                      | 0.047                 | 0.130                 |
| Starch | m968 | Ki3        | -0.18                      | 0.122                 | 0.252                 |
| Starch | m968 | Ky21       | -0.52                      | 0.000                 | 0.001**               |
| Starch | m968 | M162W      | -0.43                      | 0.000                 | 0.001*                |
| Starch | m968 | M37W       | -0.35                      | 0.000                 | 0.003*                |
| Starch | m968 | Mo18W      | 0.02                       | 0.866                 | 0.936                 |
| Starch | m968 | MS71       | -0.34                      | 0.003                 | 0.015*                |
| Starch | m968 | NC350      | -0.32                      | 0.001                 | 0.007*                |
| Starch | m968 | NC358      | -0.55                      | 0.000                 | 0.001**               |
| Starch | m968 | Oh43       | -0.09                      | 0.386                 | 0.567                 |
| Starch | m968 | Oh7B       | -0.04                      | 0.702                 | 0.843                 |
| Starch | m968 | Tx303      | -0.23                      | 0.037                 | 0.107                 |
| Starch | m968 | Tzi8       | -0.09                      | 0.369                 | 0.546                 |
| Starch | m999 | B97        | -0.34                      | 0.002                 | 0.015*                |
| Starch | m999 | CML103     | 0.13                       | 0.236                 | 0.397                 |
| Starch | m999 | CML228     | -0.21                      | 0.026                 | 0.082                 |
| Starch | m999 | CML247     | -0.34                      | 0.000                 | 0.002*                |
| Starch | m999 | CML277     | -0.05                      | 0.604                 | 0.766                 |
| Starch | m999 | CML322     | -0.28                      | 0.003                 | 0.017*                |

Table S5: (continued...Starch)

| Trait  | QTL   | Population | Effect <sup>a</sup><br>(%) | Raw<br><i>P-value</i> | FDR<br><i>P-value</i> |
|--------|-------|------------|----------------------------|-----------------------|-----------------------|
| Starch | m999  | CML333     | -0.17                      | 0.058                 | 0.147                 |
| Starch | m999  | CML52      | -0.25                      | 0.012                 | 0.046*                |
| Starch | m999  | CML69      | -0.02                      | 0.818                 | 0.910                 |
| Starch | m999  | HP301      | -0.20                      | 0.039                 | 0.110                 |
| Starch | m999  | Ki11       | -0.17                      | 0.096                 | 0.212                 |
| Starch | m999  | Ki3        | -0.39                      | 0.001                 | 0.005*                |
| Starch | m999  | Ky21       | 0.13                       | 0.178                 | 0.323                 |
| Starch | m999  | M162W      | -0.04                      | 0.681                 | 0.829                 |
| Starch | m999  | M37W       | -0.05                      | 0.604                 | 0.766                 |
| Starch | m999  | Mo18W      | -0.29                      | 0.003                 | 0.016*                |
| Starch | m999  | MS71       | -0.05                      | 0.644                 | 0.802                 |
| Starch | m999  | NC350      | -0.03                      | 0.736                 | 0.860                 |
| Starch | m999  | NC358      | -0.21                      | 0.043                 | 0.118                 |
| Starch | m999  | Oh43       | -0.12                      | 0.221                 | 0.379                 |
| Starch | m999  | Oh7B       | -0.14                      | 0.205                 | 0.362                 |
| Starch | m999  | Tx303      | -0.29                      | 0.010                 | 0.039*                |
| Starch | m999  | Tzi8       | -0.27                      | 0.010                 | 0.040*                |
| Starch | m1060 | B97        | 0.04                       | 0.658                 | 0.811                 |
| Starch | m1060 | CML103     | 0.36                       | 0.000                 | 0.001**               |
| Starch | m1060 | CML228     | 0.19                       | 0.039                 | 0.110                 |
| Starch | m1060 | CML247     | -0.01                      | 0.886                 | 0.936                 |
| Starch | m1060 | CML277     | 0.14                       | 0.112                 | 0.238                 |
| Starch | m1060 | CML322     | 0.42                       | 0.000                 | 0.001**               |
| Starch | m1060 | CML333     | 0.06                       | 0.453                 | 0.645                 |
| Starch | m1060 | CML52      | 0.17                       | 0.049                 | 0.134                 |
| Starch | m1060 | CML69      | 0.06                       | 0.510                 | 0.694                 |

Table S5: (continued...Starch)

| Trait  | QTL   | Population | Effect <sup>a</sup><br>(%) | Raw<br><i>P-value</i> | FDR<br><i>P-value</i> |
|--------|-------|------------|----------------------------|-----------------------|-----------------------|
| Starch | m1060 | HP301      | -0.26                      | 0.003                 | 0.016*                |
| Starch | m1060 | Ki11       | -0.04                      | 0.630                 | 0.793                 |
| Starch | m1060 | Ki3        | 0.39                       | 0.000                 | 0.004*                |
| Starch | m1060 | Ky21       | 0.09                       | 0.304                 | 0.475                 |
| Starch | m1060 | M162W      | 0.15                       | 0.094                 | 0.209                 |
| Starch | m1060 | M37W       | 0.25                       | 0.004                 | 0.021*                |
| Starch | m1060 | Mo18W      | 0.22                       | 0.011                 | 0.042*                |
| Starch | m1060 | MS71       | 0.18                       | 0.048                 | 0.130                 |
| Starch | m1060 | NC350      | -0.05                      | 0.598                 | 0.765                 |
| Starch | m1060 | NC358      | 0.35                       | 0.000                 | 0.002*                |
| Starch | m1060 | Oh43       | 0.08                       | 0.355                 | 0.530                 |
| Starch | m1060 | Oh7B       | 0.40                       | 0.000                 | 0.001**               |
| Starch | m1060 | Tx303      | 0.33                       | 0.000                 | 0.002*                |
| Starch | m1060 | Tzi8       | 0.23                       | 0.010                 | 0.039*                |

<sup>a</sup>Percent starch kernel composition on a dry matter basis relative to B73.

\* FDR:  $P \leq 0.05$

\*\* FDR:  $P \leq 0.001$



Table S6: NAM joint-linkage mapping analysis QTL allelic effects summary for percent protein content on a dry matter basis.

| Trait   | QTL  | Population | Effect <sup>a</sup><br>(%) | Raw<br><i>P-value</i> | FDR<br><i>P-value</i> |
|---------|------|------------|----------------------------|-----------------------|-----------------------|
| Protein | m39  | B97        | -0.04                      | 0.414                 | 0.586                 |
| Protein | m39  | CML103     | -0.12                      | 0.015                 | 0.063                 |
| Protein | m39  | CML228     | -0.15                      | 0.003                 | 0.018*                |
| Protein | m39  | CML247     | 0.05                       | 0.315                 | 0.503                 |
| Protein | m39  | CML277     | 0.06                       | 0.208                 | 0.378                 |
| Protein | m39  | CML322     | -0.02                      | 0.623                 | 0.743                 |
| Protein | m39  | CML333     | -0.04                      | 0.378                 | 0.559                 |
| Protein | m39  | CML52      | -0.04                      | 0.361                 | 0.546                 |
| Protein | m39  | CML69      | 0.03                       | 0.496                 | 0.657                 |
| Protein | m39  | HP301      | -0.04                      | 0.478                 | 0.644                 |
| Protein | m39  | Ki11       | -0.15                      | 0.003                 | 0.018*                |
| Protein | m39  | Ki3        | -0.01                      | 0.846                 | 0.905                 |
| Protein | m39  | Ky21       | 0.13                       | 0.009                 | 0.043*                |
| Protein | m39  | M162W      | -0.02                      | 0.714                 | 0.815                 |
| Protein | m39  | M37W       | 0.17                       | 0.001                 | 0.007*                |
| Protein | m39  | Mo18W      | -0.02                      | 0.629                 | 0.745                 |
| Protein | m39  | MS71       | 0.12                       | 0.010                 | 0.045                 |
| Protein | m39  | NC350      | -0.03                      | 0.584                 | 0.715                 |
| Protein | m39  | NC358      | 0.03                       | 0.544                 | 0.691                 |
| Protein | m39  | Oh43       | 0.15                       | 0.002                 | 0.012*                |
| Protein | m39  | Oh7B       | -0.02                      | 0.763                 | 0.856                 |
| Protein | m39  | Tx303      | -0.08                      | 0.082                 | 0.201                 |
| Protein | m39  | Tzi8       | -0.06                      | 0.249                 | 0.431                 |
| Protein | m115 | B97        | -0.03                      | 0.511                 | 0.666                 |
| Protein | m115 | CML103     | -0.34                      | 0.000                 | 0.001**               |
| Protein | m115 | CML228     | 0.15                       | 0.003                 | 0.019*                |
| Protein | m115 | CML247     | 0.10                       | 0.065                 | 0.171                 |
| Protein | m115 | CML277     | -0.03                      | 0.621                 | 0.742                 |
| Protein | m115 | CML322     | 0.09                       | 0.101                 | 0.230                 |
| Protein | m115 | CML333     | -0.02                      | 0.717                 | 0.815                 |
| Protein | m115 | CML52      | 0.05                       | 0.329                 | 0.519                 |
| Protein | m115 | CML69      | 0.01                       | 0.862                 | 0.920                 |
| Protein | m115 | HP301      | 0.02                       | 0.732                 | 0.827                 |
| Protein | m115 | Ki11       | 0.00                       | 0.965                 | 0.976                 |
| Protein | m115 | Ki3        | 0.15                       | 0.031                 | 0.106                 |
| Protein | m115 | Ky21       | -0.15                      | 0.003                 | 0.017*                |

Table S6: (continued...Protein)

| Trait   | QTL  | Population | Effect <sup>a</sup><br>(%) | Raw<br><i>P-value</i> | FDR<br><i>P-value</i> |
|---------|------|------------|----------------------------|-----------------------|-----------------------|
| Protein | m115 | M162W      | -0.18                      | 0.001                 | 0.009*                |
| Protein | m115 | M37W       | -0.06                      | 0.265                 | 0.446                 |
| Protein | m115 | Mo18W      | -0.03                      | 0.547                 | 0.691                 |
| Protein | m115 | MS71       | 0.06                       | 0.305                 | 0.488                 |
| Protein | m115 | NC350      | -0.11                      | 0.037                 | 0.118                 |
| Protein | m115 | NC358      | 0.00                       | 0.933                 | 0.956                 |
| Protein | m115 | Oh43       | 0.07                       | 0.231                 | 0.407                 |
| Protein | m115 | Oh7B       | 0.17                       | 0.004                 | 0.024*                |
| Protein | m115 | Tx303      | -0.09                      | 0.079                 | 0.197                 |
| Protein | m115 | Tzi8       | 0.11                       | 0.037                 | 0.118                 |
| Protein | m135 | B97        | 0.07                       | 0.144                 | 0.300                 |
| Protein | m135 | CML103     | 0.34                       | 0.000                 | 0.001**               |
| Protein | m135 | CML228     | 0.04                       | 0.511                 | 0.666                 |
| Protein | m135 | CML247     | 0.19                       | 0.000                 | 0.001*                |
| Protein | m135 | CML277     | 0.03                       | 0.615                 | 0.739                 |
| Protein | m135 | CML322     | 0.20                       | 0.000                 | 0.002*                |
| Protein | m135 | CML333     | -0.08                      | 0.160                 | 0.317                 |
| Protein | m135 | CML52      | 0.06                       | 0.215                 | 0.386                 |
| Protein | m135 | CML69      | 0.05                       | 0.377                 | 0.559                 |
| Protein | m135 | HP301      | 0.02                       | 0.700                 | 0.804                 |
| Protein | m135 | Ki11       | 0.15                       | 0.006                 | 0.029*                |
| Protein | m135 | Ki3        | 0.13                       | 0.062                 | 0.168                 |
| Protein | m135 | Ky21       | 0.13                       | 0.008                 | 0.040*                |
| Protein | m135 | M162W      | 0.07                       | 0.226                 | 0.401                 |
| Protein | m135 | M37W       | 0.02                       | 0.619                 | 0.742                 |
| Protein | m135 | Mo18W      | 0.06                       | 0.261                 | 0.443                 |
| Protein | m135 | MS71       | 0.04                       | 0.475                 | 0.642                 |
| Protein | m135 | NC350      | -0.01                      | 0.870                 | 0.924                 |
| Protein | m135 | NC358      | 0.08                       | 0.098                 | 0.229                 |
| Protein | m135 | Oh43       | 0.04                       | 0.488                 | 0.651                 |
| Protein | m135 | Oh7B       | -0.05                      | 0.343                 | 0.532                 |
| Protein | m135 | Tx303      | 0.01                       | 0.792                 | 0.877                 |
| Protein | m135 | Tzi8       | -0.07                      | 0.195                 | 0.364                 |
| Protein | m209 | B97        | 0.02                       | 0.697                 | 0.803                 |
| Protein | m209 | CML103     | 0.12                       | 0.023                 | 0.090                 |
| Protein | m209 | CML228     | -0.04                      | 0.367                 | 0.554                 |

Table S6: (continued...Protein)

| Trait   | QTL  | Population | Effect <sup>a</sup><br>(%) | Raw<br><i>P-value</i> | FDR<br><i>P-value</i> |
|---------|------|------------|----------------------------|-----------------------|-----------------------|
| Protein | m209 | CML247     | 0.13                       | 0.014                 | 0.058                 |
| Protein | m209 | CML277     | -0.02                      | 0.667                 | 0.776                 |
| Protein | m209 | CML322     | -0.14                      | 0.003                 | 0.020*                |
| Protein | m209 | CML333     | -0.02                      | 0.635                 | 0.750                 |
| Protein | m209 | CML52      | 0.06                       | 0.236                 | 0.414                 |
| Protein | m209 | CML69      | 0.07                       | 0.152                 | 0.313                 |
| Protein | m209 | HP301      | 0.01                       | 0.790                 | 0.876                 |
| Protein | m209 | Ki11       | 0.06                       | 0.212                 | 0.384                 |
| Protein | m209 | Ki3        | -0.01                      | 0.822                 | 0.890                 |
| Protein | m209 | Ky21       | 0.03                       | 0.641                 | 0.755                 |
| Protein | m209 | M162W      | 0.10                       | 0.060                 | 0.165                 |
| Protein | m209 | M37W       | -0.03                      | 0.572                 | 0.706                 |
| Protein | m209 | Mo18W      | 0.04                       | 0.383                 | 0.559                 |
| Protein | m209 | MS71       | -0.13                      | 0.009                 | 0.041*                |
| Protein | m209 | NC350      | 0.09                       | 0.077                 | 0.194                 |
| Protein | m209 | NC358      | -0.03                      | 0.552                 | 0.693                 |
| Protein | m209 | Oh43       | 0.10                       | 0.044                 | 0.132                 |
| Protein | m209 | Oh7B       | -0.22                      | 0.000                 | 0.001**               |
| Protein | m209 | Tx303      | 0.15                       | 0.001                 | 0.011*                |
| Protein | m209 | Tzi8       | 0.24                       | 0.000                 | 0.001**               |
| Protein | m261 | B97        | -0.27                      | 0.000                 | 0.001**               |
| Protein | m261 | CML103     | -0.08                      | 0.129                 | 0.276                 |
| Protein | m261 | CML228     | -0.01                      | 0.821                 | 0.890                 |
| Protein | m261 | CML247     | -0.03                      | 0.558                 | 0.698                 |
| Protein | m261 | CML277     | -0.03                      | 0.574                 | 0.708                 |
| Protein | m261 | CML322     | -0.11                      | 0.036                 | 0.118                 |
| Protein | m261 | CML333     | 0.04                       | 0.464                 | 0.630                 |
| Protein | m261 | CML52      | -0.15                      | 0.002                 | 0.015*                |
| Protein | m261 | CML69      | -0.22                      | 0.000                 | 0.001**               |
| Protein | m261 | HP301      | -0.04                      | 0.400                 | 0.572                 |
| Protein | m261 | Ki11       | -0.03                      | 0.521                 | 0.672                 |
| Protein | m261 | Ki3        | 0.01                       | 0.872                 | 0.924                 |
| Protein | m261 | Ky21       | -0.13                      | 0.019                 | 0.076                 |
| Protein | m261 | M162W      | -0.18                      | 0.001                 | 0.011*                |
| Protein | m261 | M37W       | 0.10                       | 0.117                 | 0.257                 |
| Protein | m261 | Mo18W      | -0.10                      | 0.038                 | 0.121                 |

Table S6: (continued...Protein)

| Trait   | QTL  | Population | Effect <sup>a</sup><br>(%) | Raw<br><i>P-value</i> | FDR<br><i>P-value</i> |
|---------|------|------------|----------------------------|-----------------------|-----------------------|
| Protein | m261 | MS71       | 0.05                       | 0.320                 | 0.508                 |
| Protein | m261 | NC350      | -0.07                      | 0.158                 | 0.316                 |
| Protein | m261 | NC358      | -0.07                      | 0.133                 | 0.283                 |
| Protein | m261 | Oh43       | -0.05                      | 0.294                 | 0.478                 |
| Protein | m261 | Oh7B       | -0.06                      | 0.292                 | 0.478                 |
| Protein | m261 | Tx303      | 0.08                       | 0.104                 | 0.235                 |
| Protein | m261 | Tzi8       | -0.08                      | 0.158                 | 0.316                 |
| Protein | m300 | B97        | -0.08                      | 0.085                 | 0.209                 |
| Protein | m300 | CML103     | 0.14                       | 0.002                 | 0.015*                |
| Protein | m300 | CML228     | -0.04                      | 0.418                 | 0.588                 |
| Protein | m300 | CML247     | -0.08                      | 0.124                 | 0.270                 |
| Protein | m300 | CML277     | -0.10                      | 0.044                 | 0.132                 |
| Protein | m300 | CML322     | -0.08                      | 0.103                 | 0.234                 |
| Protein | m300 | CML333     | -0.11                      | 0.015                 | 0.062                 |
| Protein | m300 | CML52      | -0.07                      | 0.159                 | 0.317                 |
| Protein | m300 | CML69      | 0.03                       | 0.587                 | 0.717                 |
| Protein | m300 | HP301      | -0.05                      | 0.317                 | 0.506                 |
| Protein | m300 | Ki11       | 0.02                       | 0.653                 | 0.766                 |
| Protein | m300 | Ki3        | 0.11                       | 0.064                 | 0.170                 |
| Protein | m300 | Ky21       | 0.02                       | 0.708                 | 0.810                 |
| Protein | m300 | M162W      | -0.05                      | 0.342                 | 0.531                 |
| Protein | m300 | M37W       | -0.03                      | 0.570                 | 0.705                 |
| Protein | m300 | Mo18W      | -0.06                      | 0.200                 | 0.367                 |
| Protein | m300 | MS71       | -0.10                      | 0.040                 | 0.125                 |
| Protein | m300 | NC350      | -0.16                      | 0.001                 | 0.008*                |
| Protein | m300 | NC358      | -0.03                      | 0.529                 | 0.678                 |
| Protein | m300 | Oh43       | 0.01                       | 0.913                 | 0.946                 |
| Protein | m300 | Oh7B       | 0.00                       | 0.992                 | 0.995                 |
| Protein | m300 | Tx303      | -0.19                      | 0.000                 | 0.002*                |
| Protein | m300 | Tzi8       | -0.14                      | 0.004                 | 0.023*                |
| Protein | m353 | B97        | 0.03                       | 0.597                 | 0.726                 |
| Protein | m353 | CML103     | 0.03                       | 0.470                 | 0.637                 |
| Protein | m353 | CML228     | -0.02                      | 0.660                 | 0.772                 |
| Protein | m353 | CML247     | 0.04                       | 0.338                 | 0.527                 |
| Protein | m353 | CML277     | -0.09                      | 0.055                 | 0.154                 |
| Protein | m353 | CML322     | 0.02                       | 0.663                 | 0.773                 |

Table S6: (continued...Protein)

| Trait   | QTL  | Population | Effect <sup>a</sup><br>(%) | Raw<br><i>P-value</i> | FDR<br><i>P-value</i> |
|---------|------|------------|----------------------------|-----------------------|-----------------------|
| Protein | m353 | CML333     | -0.01                      | 0.838                 | 0.903                 |
| Protein | m353 | CML52      | 0.10                       | 0.026                 | 0.096                 |
| Protein | m353 | CML69      | 0.02                       | 0.695                 | 0.802                 |
| Protein | m353 | HP301      | 0.10                       | 0.051                 | 0.146                 |
| Protein | m353 | Ki11       | 0.12                       | 0.009                 | 0.043*                |
| Protein | m353 | Ki3        | -0.02                      | 0.723                 | 0.821                 |
| Protein | m353 | Ky21       | 0.00                       | 0.948                 | 0.967                 |
| Protein | m353 | M162W      | -0.08                      | 0.116                 | 0.256                 |
| Protein | m353 | M37W       | 0.10                       | 0.036                 | 0.118                 |
| Protein | m353 | Mo18W      | -0.04                      | 0.486                 | 0.651                 |
| Protein | m353 | MS71       | 0.15                       | 0.001                 | 0.009*                |
| Protein | m353 | NC350      | 0.09                       | 0.054                 | 0.152                 |
| Protein | m353 | NC358      | 0.08                       | 0.092                 | 0.220                 |
| Protein | m353 | Oh43       | 0.17                       | 0.001                 | 0.007*                |
| Protein | m353 | Oh7B       | 0.15                       | 0.002                 | 0.012*                |
| Protein | m353 | Tx303      | 0.15                       | 0.003                 | 0.017*                |
| Protein | m353 | Tzi8       | -0.27                      | 0.000                 | 0.001**               |
| Protein | m426 | B97        | -0.10                      | 0.042                 | 0.127                 |
| Protein | m426 | CML103     | -0.13                      | 0.005                 | 0.026*                |
| Protein | m426 | CML228     | -0.11                      | 0.022                 | 0.085                 |
| Protein | m426 | CML247     | -0.08                      | 0.080                 | 0.199                 |
| Protein | m426 | CML277     | 0.03                       | 0.532                 | 0.678                 |
| Protein | m426 | CML322     | -0.07                      | 0.141                 | 0.296                 |
| Protein | m426 | CML333     | -0.12                      | 0.010                 | 0.043*                |
| Protein | m426 | CML52      | 0.10                       | 0.042                 | 0.127                 |
| Protein | m426 | CML69      | -0.19                      | 0.000                 | 0.001*                |
| Protein | m426 | HP301      | 0.04                       | 0.405                 | 0.576                 |
| Protein | m426 | Ki11       | -0.03                      | 0.586                 | 0.716                 |
| Protein | m426 | Ki3        | 0.02                       | 0.761                 | 0.855                 |
| Protein | m426 | Ky21       | -0.02                      | 0.607                 | 0.736                 |
| Protein | m426 | M162W      | 0.02                       | 0.612                 | 0.736                 |
| Protein | m426 | M37W       | -0.02                      | 0.611                 | 0.736                 |
| Protein | m426 | Mo18W      | -0.12                      | 0.010                 | 0.045*                |
| Protein | m426 | MS71       | -0.06                      | 0.214                 | 0.386                 |
| Protein | m426 | NC350      | -0.08                      | 0.089                 | 0.216                 |
| Protein | m426 | NC358      | -0.07                      | 0.154                 | 0.313                 |

Table S6: (continued...Protein)

| Trait   | QTL  | Population | Effect <sup>a</sup><br>(%) | Raw<br><i>P-value</i> | FDR<br><i>P-value</i> |
|---------|------|------------|----------------------------|-----------------------|-----------------------|
| Protein | m426 | Oh43       | 0.04                       | 0.375                 | 0.558                 |
| Protein | m426 | Oh7B       | -0.05                      | 0.271                 | 0.452                 |
| Protein | m426 | Tx303      | -0.16                      | 0.001                 | 0.007*                |
| Protein | m426 | Tzi8       | -0.02                      | 0.753                 | 0.848                 |
| Protein | m484 | B97        | -0.04                      | 0.436                 | 0.601                 |
| Protein | m484 | CML103     | -0.01                      | 0.811                 | 0.887                 |
| Protein | m484 | CML228     | 0.12                       | 0.034                 | 0.114                 |
| Protein | m484 | CML247     | 0.11                       | 0.036                 | 0.118                 |
| Protein | m484 | CML277     | 0.04                       | 0.420                 | 0.590                 |
| Protein | m484 | CML322     | 0.12                       | 0.014                 | 0.059                 |
| Protein | m484 | CML333     | -0.05                      | 0.357                 | 0.543                 |
| Protein | m484 | CML52      | 0.23                       | 0.000                 | 0.001*                |
| Protein | m484 | CML69      | 0.20                       | 0.000                 | 0.003*                |
| Protein | m484 | HP301      | 0.10                       | 0.079                 | 0.197                 |
| Protein | m484 | Ki11       | 0.11                       | 0.040                 | 0.125                 |
| Protein | m484 | Ki3        | 0.05                       | 0.428                 | 0.598                 |
| Protein | m484 | Ky21       | 0.04                       | 0.380                 | 0.559                 |
| Protein | m484 | M162W      | 0.08                       | 0.123                 | 0.268                 |
| Protein | m484 | M37W       | 0.10                       | 0.063                 | 0.168                 |
| Protein | m484 | Mo18W      | 0.09                       | 0.100                 | 0.230                 |
| Protein | m484 | MS71       | -0.07                      | 0.243                 | 0.422                 |
| Protein | m484 | NC350      | 0.08                       | 0.185                 | 0.349                 |
| Protein | m484 | NC358      | 0.10                       | 0.080                 | 0.199                 |
| Protein | m484 | Oh43       | 0.10                       | 0.065                 | 0.171                 |
| Protein | m484 | Oh7B       | 0.14                       | 0.050                 | 0.145                 |
| Protein | m484 | Tx303      | 0.09                       | 0.100                 | 0.230                 |
| Protein | m484 | Tzi8       | 0.25                       | 0.000                 | 0.001**               |
| Protein | m495 | B97        | 0.03                       | 0.549                 | 0.692                 |
| Protein | m495 | CML103     | -0.01                      | 0.904                 | 0.943                 |
| Protein | m495 | CML228     | -0.08                      | 0.154                 | 0.313                 |
| Protein | m495 | CML247     | 0.10                       | 0.063                 | 0.168                 |
| Protein | m495 | CML277     | -0.03                      | 0.567                 | 0.705                 |
| Protein | m495 | CML322     | 0.06                       | 0.214                 | 0.386                 |
| Protein | m495 | CML333     | 0.07                       | 0.180                 | 0.344                 |
| Protein | m495 | CML52      | 0.20                       | 0.000                 | 0.003*                |
| Protein | m495 | CML69      | 0.01                       | 0.821                 | 0.890                 |

Table S6: (continued...Protein)

| Trait   | QTL  | Population | Effect <sup>a</sup><br>(%) | Raw<br><i>P</i> -value | FDR<br><i>P</i> -value |
|---------|------|------------|----------------------------|------------------------|------------------------|
| Protein | m495 | HP301      | -0.05                      | 0.337                  | 0.527                  |
| Protein | m495 | Ki11       | 0.09                       | 0.089                  | 0.216                  |
| Protein | m495 | Ki3        | 0.10                       | 0.142                  | 0.296                  |
| Protein | m495 | Ky21       | -0.20                      | 0.000                  | 0.002*                 |
| Protein | m495 | M162W      | 0.01                       | 0.878                  | 0.928                  |
| Protein | m495 | M37W       | 0.08                       | 0.155                  | 0.314                  |
| Protein | m495 | Mo18W      | -0.04                      | 0.518                  | 0.671                  |
| Protein | m495 | MS71       | 0.12                       | 0.037                  | 0.118                  |
| Protein | m495 | NC350      | 0.17                       | 0.003                  | 0.019*                 |
| Protein | m495 | NC358      | -0.01                      | 0.842                  | 0.904                  |
| Protein | m495 | Oh43       | -0.03                      | 0.547                  | 0.691                  |
| Protein | m495 | Oh7B       | -0.12                      | 0.103                  | 0.234                  |
| Protein | m495 | Tx303      | -0.05                      | 0.404                  | 0.576                  |
| Protein | m495 | Tzi8       | -0.05                      | 0.447                  | 0.612                  |
| Protein | m615 | B97        | -0.03                      | 0.514                  | 0.669                  |
| Protein | m615 | CML103     | -0.20                      | 0.000                  | 0.002*                 |
| Protein | m615 | CML228     | 0.13                       | 0.012                  | 0.051                  |
| Protein | m615 | CML247     | 0.08                       | 0.114                  | 0.253                  |
| Protein | m615 | CML277     | 0.10                       | 0.039                  | 0.123                  |
| Protein | m615 | CML322     | -0.01                      | 0.819                  | 0.890                  |
| Protein | m615 | CML333     | 0.04                       | 0.413                  | 0.585                  |
| Protein | m615 | CML52      | -0.13                      | 0.009                  | 0.043*                 |
| Protein | m615 | CML69      | 0.07                       | 0.148                  | 0.306                  |
| Protein | m615 | HP301      | -0.11                      | 0.023                  | 0.089                  |
| Protein | m615 | Ki11       | -0.11                      | 0.026                  | 0.096                  |
| Protein | m615 | Ki3        | -0.19                      | 0.003                  | 0.019*                 |
| Protein | m615 | Ky21       | -0.01                      | 0.808                  | 0.886                  |
| Protein | m615 | M162W      | -0.01                      | 0.863                  | 0.920                  |
| Protein | m615 | M37W       | 0.02                       | 0.715                  | 0.815                  |
| Protein | m615 | Mo18W      | -0.01                      | 0.809                  | 0.886                  |
| Protein | m615 | MS71       | -0.09                      | 0.073                  | 0.186                  |
| Protein | m615 | NC350      | 0.07                       | 0.156                  | 0.315                  |
| Protein | m615 | NC358      | 0.03                       | 0.594                  | 0.723                  |
| Protein | m615 | Oh43       | 0.02                       | 0.753                  | 0.848                  |
| Protein | m615 | Oh7B       | -0.13                      | 0.012                  | 0.052                  |
| Protein | m615 | Tx303      | -0.34                      | 0.000                  | 0.001**                |

Table S6: (continued...Protein)

| Trait   | QTL  | Population | Effect <sup>a</sup><br>(%) | Raw<br><i>P-value</i> | FDR<br><i>P-value</i> |
|---------|------|------------|----------------------------|-----------------------|-----------------------|
| Protein | m615 | Tzi8       | -0.03                      | 0.546                 | 0.691                 |
| Protein | m657 | B97        | 0.18                       | 0.001                 | 0.007*                |
| Protein | m657 | CML103     | 0.21                       | 0.000                 | 0.001*                |
| Protein | m657 | CML228     | -0.02                      | 0.771                 | 0.859                 |
| Protein | m657 | CML247     | 0.04                       | 0.407                 | 0.578                 |
| Protein | m657 | CML277     | 0.15                       | 0.002                 | 0.014*                |
| Protein | m657 | CML322     | 0.04                       | 0.505                 | 0.662                 |
| Protein | m657 | CML333     | 0.15                       | 0.006                 | 0.029*                |
| Protein | m657 | CML52      | 0.05                       | 0.372                 | 0.557                 |
| Protein | m657 | CML69      | 0.15                       | 0.003                 | 0.018*                |
| Protein | m657 | HP301      | 0.04                       | 0.417                 | 0.588                 |
| Protein | m657 | Ki11       | 0.07                       | 0.154                 | 0.313                 |
| Protein | m657 | Ki3        | 0.33                       | 0.000                 | 0.001**               |
| Protein | m657 | Ky21       | 0.10                       | 0.047                 | 0.139                 |
| Protein | m657 | M162W      | -0.09                      | 0.062                 | 0.168                 |
| Protein | m657 | M37W       | 0.03                       | 0.621                 | 0.742                 |
| Protein | m657 | Mo18W      | 0.11                       | 0.021                 | 0.084                 |
| Protein | m657 | MS71       | 0.07                       | 0.150                 | 0.309                 |
| Protein | m657 | NC350      | 0.04                       | 0.391                 | 0.566                 |
| Protein | m657 | NC358      | 0.00                       | 0.924                 | 0.955                 |
| Protein | m657 | Oh43       | 0.01                       | 0.883                 | 0.928                 |
| Protein | m657 | Oh7B       | 0.08                       | 0.118                 | 0.257                 |
| Protein | m657 | Tx303      | 0.32                       | 0.000                 | 0.001**               |
| Protein | m657 | Tzi8       | 0.23                       | 0.000                 | 0.001**               |
| Protein | m694 | B97        | 0.10                       | 0.056                 | 0.157                 |
| Protein | m694 | CML103     | 0.16                       | 0.002                 | 0.012*                |
| Protein | m694 | CML228     | 0.04                       | 0.459                 | 0.627                 |
| Protein | m694 | CML247     | 0.07                       | 0.222                 | 0.397                 |
| Protein | m694 | CML277     | 0.16                       | 0.005                 | 0.026*                |
| Protein | m694 | CML322     | 0.07                       | 0.209                 | 0.381                 |
| Protein | m694 | CML333     | -0.05                      | 0.391                 | 0.566                 |
| Protein | m694 | CML52      | -0.02                      | 0.777                 | 0.863                 |
| Protein | m694 | CML69      | 0.08                       | 0.171                 | 0.334                 |
| Protein | m694 | HP301      | 0.06                       | 0.304                 | 0.488                 |
| Protein | m694 | Ki11       | 0.14                       | 0.011                 | 0.047*                |
| Protein | m694 | Ki3        | 0.16                       | 0.026                 | 0.096                 |



Table S6: (continued...Protein)

| Trait   | QTL  | Population | Effect <sup>a</sup><br>(%) | Raw<br><i>P-value</i> | FDR<br><i>P-value</i> |
|---------|------|------------|----------------------------|-----------------------|-----------------------|
| Protein | m694 | Ky21       | 0.03                       | 0.583                 | 0.715                 |
| Protein | m694 | M162W      | 0.06                       | 0.285                 | 0.470                 |
| Protein | m694 | M37W       | 0.00                       | 0.999                 | 0.999                 |
| Protein | m694 | Mo18W      | 0.08                       | 0.170                 | 0.333                 |
| Protein | m694 | MS71       | 0.05                       | 0.350                 | 0.536                 |
| Protein | m694 | NC350      | 0.18                       | 0.001                 | 0.009*                |
| Protein | m694 | NC358      | 0.22                       | 0.000                 | 0.001*                |
| Protein | m694 | Oh43       | -0.09                      | 0.126                 | 0.271                 |
| Protein | m694 | Oh7B       | -0.05                      | 0.394                 | 0.569                 |
| Protein | m694 | Tx303      | 0.18                       | 0.002                 | 0.014*                |
| Protein | m694 | Tzi8       | 0.09                       | 0.090                 | 0.216                 |
| Protein | m707 | B97        | -0.12                      | 0.068                 | 0.177                 |
| Protein | m707 | CML103     | 0.05                       | 0.436                 | 0.601                 |
| Protein | m707 | CML228     | 0.05                       | 0.382                 | 0.559                 |
| Protein | m707 | CML247     | -0.01                      | 0.843                 | 0.904                 |
| Protein | m707 | CML277     | -0.11                      | 0.063                 | 0.169                 |
| Protein | m707 | CML322     | -0.03                      | 0.610                 | 0.736                 |
| Protein | m707 | CML333     | 0.04                       | 0.563                 | 0.702                 |
| Protein | m707 | CML52      | -0.02                      | 0.771                 | 0.859                 |
| Protein | m707 | CML69      | 0.05                       | 0.352                 | 0.539                 |
| Protein | m707 | HP301      | -0.09                      | 0.153                 | 0.313                 |
| Protein | m707 | Ki11       | 0.06                       | 0.334                 | 0.525                 |
| Protein | m707 | Ki3        | 0.13                       | 0.073                 | 0.186                 |
| Protein | m707 | Ky21       | 0.13                       | 0.041                 | 0.127                 |
| Protein | m707 | M162W      | 0.01                       | 0.864                 | 0.920                 |
| Protein | m707 | M37W       | 0.10                       | 0.128                 | 0.274                 |
| Protein | m707 | Mo18W      | 0.02                       | 0.700                 | 0.804                 |
| Protein | m707 | MS71       | 0.01                       | 0.933                 | 0.956                 |
| Protein | m707 | NC350      | 0.20                       | 0.008                 | 0.038*                |
| Protein | m707 | NC358      | -0.05                      | 0.349                 | 0.536                 |
| Protein | m707 | Oh43       | 0.00                       | 0.951                 | 0.968                 |
| Protein | m707 | Oh7B       | 0.32                       | 0.000                 | 0.001**               |
| Protein | m707 | Tx303      | 0.21                       | 0.001                 | 0.008*                |
| Protein | m707 | Tzi8       | 0.07                       | 0.252                 | 0.433                 |
| Protein | m729 | B97        | 0.01                       | 0.880                 | 0.928                 |
| Protein | m729 | CML103     | -0.08                      | 0.134                 | 0.283                 |

Table S6: (continued...Protein)

| Trait   | QTL  | Population | Effect <sup>a</sup><br>(%) | Raw<br><i>P-value</i> | FDR<br><i>P-value</i> |
|---------|------|------------|----------------------------|-----------------------|-----------------------|
| Protein | m729 | CML228     | -0.06                      | 0.220                 | 0.393                 |
| Protein | m729 | CML247     | -0.08                      | 0.147                 | 0.305                 |
| Protein | m729 | CML277     | -0.10                      | 0.051                 | 0.146                 |
| Protein | m729 | CML322     | -0.05                      | 0.380                 | 0.559                 |
| Protein | m729 | CML333     | -0.06                      | 0.292                 | 0.478                 |
| Protein | m729 | CML52      | -0.07                      | 0.131                 | 0.280                 |
| Protein | m729 | CML69      | -0.18                      | 0.000                 | 0.003*                |
| Protein | m729 | HP301      | 0.00                       | 0.994                 | 0.995                 |
| Protein | m729 | Ki11       | -0.17                      | 0.003                 | 0.019*                |
| Protein | m729 | Ki3        | -0.38                      | 0.000                 | 0.001**               |
| Protein | m729 | Ky21       | 0.00                       | 0.926                 | 0.955                 |
| Protein | m729 | M162W      | -0.07                      | 0.181                 | 0.344                 |
| Protein | m729 | M37W       | -0.16                      | 0.002                 | 0.014*                |
| Protein | m729 | Mo18W      | 0.07                       | 0.201                 | 0.367                 |
| Protein | m729 | MS71       | -0.19                      | 0.000                 | 0.003*                |
| Protein | m729 | NC350      | -0.22                      | 0.000                 | 0.005*                |
| Protein | m729 | NC358      | -0.17                      | 0.001                 | 0.011*                |
| Protein | m729 | Oh43       | -0.02                      | 0.628                 | 0.745                 |
| Protein | m729 | Oh7B       | -0.07                      | 0.264                 | 0.446                 |
| Protein | m729 | Tx303      | -0.20                      | 0.000                 | 0.002*                |
| Protein | m729 | Tzi8       | 0.03                       | 0.560                 | 0.699                 |
| Protein | m757 | B97        | 0.08                       | 0.086                 | 0.210                 |
| Protein | m757 | CML103     | 0.09                       | 0.096                 | 0.225                 |
| Protein | m757 | CML228     | 0.04                       | 0.437                 | 0.601                 |
| Protein | m757 | CML247     | 0.00                       | 0.967                 | 0.976                 |
| Protein | m757 | CML277     | -0.01                      | 0.824                 | 0.891                 |
| Protein | m757 | CML322     | 0.07                       | 0.160                 | 0.317                 |
| Protein | m757 | CML333     | 0.06                       | 0.199                 | 0.366                 |
| Protein | m757 | CML52      | 0.12                       | 0.008                 | 0.039*                |
| Protein | m757 | CML69      | -0.03                      | 0.548                 | 0.691                 |
| Protein | m757 | HP301      | 0.06                       | 0.185                 | 0.349                 |
| Protein | m757 | Ki11       | 0.20                       | 0.000                 | 0.001**               |
| Protein | m757 | Ki3        | 0.02                       | 0.796                 | 0.879                 |
| Protein | m757 | Ky21       | 0.20                       | 0.000                 | 0.001**               |
| Protein | m757 | M162W      | 0.00                       | 0.930                 | 0.955                 |
| Protein | m757 | M37W       | -0.02                      | 0.651                 | 0.765                 |

Table S6: (continued...Protein)

| Trait   | QTL  | Population | Effect <sup>a</sup><br>(%) | Raw<br><i>P</i> -value | FDR<br><i>P</i> -value |
|---------|------|------------|----------------------------|------------------------|------------------------|
| Protein | m757 | Mo18W      | 0.08                       | 0.113                  | 0.253                  |
| Protein | m757 | MS71       | -0.05                      | 0.290                  | 0.477                  |
| Protein | m757 | NC350      | -0.01                      | 0.908                  | 0.943                  |
| Protein | m757 | NC358      | 0.09                       | 0.072                  | 0.184                  |
| Protein | m757 | Oh43       | 0.00                       | 0.955                  | 0.970                  |
| Protein | m757 | Oh7B       | -0.03                      | 0.517                  | 0.670                  |
| Protein | m757 | Tx303      | 0.17                       | 0.000                  | 0.005*                 |
| Protein | m757 | Tzi8       | 0.13                       | 0.008                  | 0.039*                 |
| Protein | m802 | B97        | -0.02                      | 0.799                  | 0.879                  |
| Protein | m802 | CML103     | -0.04                      | 0.502                  | 0.661                  |
| Protein | m802 | CML228     | -0.07                      | 0.135                  | 0.285                  |
| Protein | m802 | CML247     | -0.06                      | 0.256                  | 0.436                  |
| Protein | m802 | CML277     | -0.25                      | 0.000                  | 0.001**                |
| Protein | m802 | CML322     | -0.04                      | 0.436                  | 0.601                  |
| Protein | m802 | CML333     | -0.05                      | 0.375                  | 0.558                  |
| Protein | m802 | CML52      | -0.19                      | 0.000                  | 0.002*                 |
| Protein | m802 | CML69      | -0.25                      | 0.000                  | 0.001**                |
| Protein | m802 | HP301      | -0.04                      | 0.496                  | 0.657                  |
| Protein | m802 | Ki11       | 0.04                       | 0.499                  | 0.658                  |
| Protein | m802 | Ki3        | -0.07                      | 0.263                  | 0.446                  |
| Protein | m802 | Ky21       | -0.05                      | 0.303                  | 0.488                  |
| Protein | m802 | M162W      | 0.00                       | 0.959                  | 0.972                  |
| Protein | m802 | M37W       | 0.03                       | 0.521                  | 0.672                  |
| Protein | m802 | Mo18W      | -0.07                      | 0.180                  | 0.344                  |
| Protein | m802 | MS71       | -0.01                      | 0.843                  | 0.904                  |
| Protein | m802 | NC350      | -0.11                      | 0.034                  | 0.114                  |
| Protein | m802 | NC358      | -0.02                      | 0.726                  | 0.822                  |
| Protein | m802 | Oh43       | -0.11                      | 0.058                  | 0.161                  |
| Protein | m802 | Oh7B       | -0.12                      | 0.050                  | 0.145                  |
| Protein | m802 | Tx303      | 0.05                       | 0.347                  | 0.536                  |
| Protein | m802 | Tzi8       | 0.13                       | 0.015                  | 0.061                  |
| Protein | m820 | B97        | -0.15                      | 0.012                  | 0.051                  |
| Protein | m820 | CML103     | -0.07                      | 0.285                  | 0.470                  |
| Protein | m820 | CML228     | -0.12                      | 0.033                  | 0.112                  |
| Protein | m820 | CML247     | -0.11                      | 0.045                  | 0.133                  |
| Protein | m820 | CML277     | -0.05                      | 0.433                  | 0.601                  |

Table S6: (continued...Protein)

| Trait   | QTL  | Population | Effect <sup>a</sup><br>(%) | Raw<br><i>P-value</i> | FDR<br><i>P-value</i> |
|---------|------|------------|----------------------------|-----------------------|-----------------------|
| Protein | m820 | CML322     | 0.08                       | 0.164                 | 0.324                 |
| Protein | m820 | CML333     | -0.09                      | 0.095                 | 0.224                 |
| Protein | m820 | CML52      | -0.18                      | 0.003                 | 0.017*                |
| Protein | m820 | CML69      | -0.07                      | 0.172                 | 0.334                 |
| Protein | m820 | HP301      | -0.07                      | 0.252                 | 0.433                 |
| Protein | m820 | Ki11       | -0.11                      | 0.091                 | 0.217                 |
| Protein | m820 | Ki3        | -0.12                      | 0.090                 | 0.216                 |
| Protein | m820 | Ky21       | -0.18                      | 0.001                 | 0.011*                |
| Protein | m820 | M162W      | 0.16                       | 0.003                 | 0.019*                |
| Protein | m820 | M37W       | 0.07                       | 0.231                 | 0.407                 |
| Protein | m820 | Mo18W      | -0.13                      | 0.036                 | 0.118                 |
| Protein | m820 | MS71       | -0.09                      | 0.086                 | 0.209                 |
| Protein | m820 | NC350      | 0.01                       | 0.909                 | 0.943                 |
| Protein | m820 | NC358      | -0.07                      | 0.166                 | 0.327                 |
| Protein | m820 | Oh43       | 0.02                       | 0.799                 | 0.879                 |
| Protein | m820 | Oh7B       | 0.01                       | 0.930                 | 0.955                 |
| Protein | m820 | Tx303      | -0.17                      | 0.002                 | 0.012*                |
| Protein | m820 | Tzi8       | -0.14                      | 0.012                 | 0.051                 |
| Protein | m872 | B97        | -0.10                      | 0.114                 | 0.253                 |
| Protein | m872 | CML103     | -0.13                      | 0.025                 | 0.094                 |
| Protein | m872 | CML228     | -0.01                      | 0.881                 | 0.928                 |
| Protein | m872 | CML247     | -0.12                      | 0.031                 | 0.106                 |
| Protein | m872 | CML277     | -0.13                      | 0.009                 | 0.043*                |
| Protein | m872 | CML322     | -0.11                      | 0.027                 | 0.098                 |
| Protein | m872 | CML333     | 0.02                       | 0.684                 | 0.791                 |
| Protein | m872 | CML52      | -0.14                      | 0.006                 | 0.029*                |
| Protein | m872 | CML69      | -0.11                      | 0.033                 | 0.112                 |
| Protein | m872 | HP301      | -0.05                      | 0.319                 | 0.508                 |
| Protein | m872 | Ki11       | -0.23                      | 0.000                 | 0.002*                |
| Protein | m872 | Ki3        | -0.19                      | 0.009                 | 0.042*                |
| Protein | m872 | Ky21       | -0.13                      | 0.029                 | 0.101                 |
| Protein | m872 | M162W      | 0.15                       | 0.005                 | 0.027*                |
| Protein | m872 | M37W       | -0.10                      | 0.070                 | 0.182                 |
| Protein | m872 | Mo18W      | -0.05                      | 0.387                 | 0.563                 |
| Protein | m872 | MS71       | -0.02                      | 0.767                 | 0.859                 |
| Protein | m872 | NC350      | -0.07                      | 0.179                 | 0.344                 |

Table S6: (continued...Protein)

| Trait   | QTL  | Population | Effect <sup>a</sup><br>(%) | Raw<br><i>P-value</i> | FDR<br><i>P-value</i> |
|---------|------|------------|----------------------------|-----------------------|-----------------------|
| Protein | m872 | NC358      | -0.09                      | 0.101                 | 0.230                 |
| Protein | m872 | Oh43       | -0.05                      | 0.383                 | 0.559                 |
| Protein | m872 | Oh7B       | -0.04                      | 0.568                 | 0.705                 |
| Protein | m872 | Tx303      | -0.15                      | 0.006                 | 0.031*                |
| Protein | m872 | Tzi8       | -0.20                      | 0.000                 | 0.002*                |
| Protein | m912 | B97        | 0.09                       | 0.172                 | 0.334                 |
| Protein | m912 | CML103     | -0.05                      | 0.464                 | 0.630                 |
| Protein | m912 | CML228     | -0.13                      | 0.028                 | 0.099                 |
| Protein | m912 | CML247     | -0.08                      | 0.185                 | 0.349                 |
| Protein | m912 | CML277     | 0.01                       | 0.838                 | 0.903                 |
| Protein | m912 | CML322     | 0.05                       | 0.398                 | 0.572                 |
| Protein | m912 | CML333     | 0.02                       | 0.678                 | 0.786                 |
| Protein | m912 | CML52      | -0.11                      | 0.047                 | 0.139                 |
| Protein | m912 | CML69      | 0.14                       | 0.035                 | 0.115                 |
| Protein | m912 | HP301      | 0.07                       | 0.266                 | 0.446                 |
| Protein | m912 | Ki11       | 0.08                       | 0.227                 | 0.402                 |
| Protein | m912 | Ki3        | -0.36                      | 0.000                 | 0.003*                |
| Protein | m912 | Ky21       | 0.00                       | 0.977                 | 0.985                 |
| Protein | m912 | M162W      | -0.15                      | 0.024                 | 0.092                 |
| Protein | m912 | M37W       | -0.18                      | 0.003                 | 0.020*                |
| Protein | m912 | Mo18W      | -0.02                      | 0.770                 | 0.859                 |
| Protein | m912 | MS71       | 0.14                       | 0.012                 | 0.051                 |
| Protein | m912 | NC350      | -0.07                      | 0.254                 | 0.435                 |
| Protein | m912 | NC358      | -0.18                      | 0.004                 | 0.021*                |
| Protein | m912 | Oh43       | -0.09                      | 0.114                 | 0.253                 |
| Protein | m912 | Oh7B       | 0.16                       | 0.031                 | 0.106                 |
| Protein | m912 | Tx303      | 0.06                       | 0.293                 | 0.478                 |
| Protein | m912 | Tzi8       | -0.17                      | 0.002                 | 0.014*                |
| Protein | m930 | B97        | -0.03                      | 0.612                 | 0.736                 |
| Protein | m930 | CML103     | 0.13                       | 0.027                 | 0.099                 |
| Protein | m930 | CML228     | 0.19                       | 0.000                 | 0.004*                |
| Protein | m930 | CML247     | 0.01                       | 0.796                 | 0.879                 |
| Protein | m930 | CML277     | -0.12                      | 0.025                 | 0.094                 |
| Protein | m930 | CML322     | 0.10                       | 0.054                 | 0.154                 |
| Protein | m930 | CML333     | -0.03                      | 0.672                 | 0.781                 |
| Protein | m930 | CML52      | 0.05                       | 0.331                 | 0.521                 |

Table S6: (continued...Protein)

| Trait   | QTL  | Population | Effect <sup>a</sup><br>(%) | Raw<br><i>P</i> -value | FDR<br><i>P</i> -value |
|---------|------|------------|----------------------------|------------------------|------------------------|
| Protein | m930 | CML69      | -0.08                      | 0.181                  | 0.344                  |
| Protein | m930 | HP301      | 0.04                       | 0.532                  | 0.678                  |
| Protein | m930 | Ki11       | -0.01                      | 0.908                  | 0.943                  |
| Protein | m930 | Ki3        | 0.16                       | 0.055                  | 0.154                  |
| Protein | m930 | Ky21       | -0.05                      | 0.341                  | 0.531                  |
| Protein | m930 | M162W      | -0.09                      | 0.101                  | 0.230                  |
| Protein | m930 | M37W       | 0.05                       | 0.381                  | 0.559                  |
| Protein | m930 | Mo18W      | 0.04                       | 0.455                  | 0.623                  |
| Protein | m930 | MS71       | 0.07                       | 0.192                  | 0.361                  |
| Protein | m930 | NC350      | 0.22                       | 0.000                  | 0.002*                 |
| Protein | m930 | NC358      | 0.05                       | 0.368                  | 0.554                  |
| Protein | m930 | Oh43       | -0.05                      | 0.372                  | 0.557                  |
| Protein | m930 | Oh7B       | 0.18                       | 0.001                  | 0.007*                 |
| Protein | m930 | Tx303      | 0.03                       | 0.629                  | 0.745                  |
| Protein | m930 | Tzi8       | 0.08                       | 0.126                  | 0.271                  |
| Protein | m963 | B97        | 0.09                       | 0.081                  | 0.201                  |
| Protein | m963 | CML103     | 0.01                       | 0.893                  | 0.937                  |
| Protein | m963 | CML228     | 0.04                       | 0.399                  | 0.572                  |
| Protein | m963 | CML247     | 0.11                       | 0.028                  | 0.099                  |
| Protein | m963 | CML277     | 0.06                       | 0.192                  | 0.361                  |
| Protein | m963 | CML322     | -0.01                      | 0.895                  | 0.937                  |
| Protein | m963 | CML333     | 0.08                       | 0.106                  | 0.238                  |
| Protein | m963 | CML52      | 0.02                       | 0.663                  | 0.773                  |
| Protein | m963 | CML69      | 0.18                       | 0.000                  | 0.003*                 |
| Protein | m963 | HP301      | 0.02                       | 0.642                  | 0.755                  |
| Protein | m963 | Ki11       | 0.00                       | 0.986                  | 0.993                  |
| Protein | m963 | Ki3        | 0.15                       | 0.018                  | 0.073                  |
| Protein | m963 | Ky21       | 0.29                       | 0.000                  | 0.001**                |
| Protein | m963 | M162W      | 0.12                       | 0.025                  | 0.095                  |
| Protein | m963 | M37W       | 0.13                       | 0.010                  | 0.043*                 |
| Protein | m963 | Mo18W      | 0.02                       | 0.702                  | 0.804                  |
| Protein | m963 | MS71       | 0.10                       | 0.054                  | 0.152                  |
| Protein | m963 | NC350      | 0.16                       | 0.001                  | 0.005*                 |
| Protein | m963 | NC358      | 0.11                       | 0.030                  | 0.105                  |
| Protein | m963 | Oh43       | 0.05                       | 0.349                  | 0.536                  |
| Protein | m963 | Oh7B       | 0.06                       | 0.271                  | 0.452                  |

Table S6: (continued...Protein)

| Trait   | QTL   | Population | Effect <sup>a</sup><br>(%) | Raw<br><i>P-value</i> | FDR<br><i>P-value</i> |
|---------|-------|------------|----------------------------|-----------------------|-----------------------|
| Protein | m963  | Tx303      | 0.10                       | 0.066                 | 0.171                 |
| Protein | m963  | Tzi8       | 0.04                       | 0.491                 | 0.652                 |
| Protein | m1009 | B97        | 0.15                       | 0.003                 | 0.018*                |
| Protein | m1009 | CML103     | 0.11                       | 0.032                 | 0.110                 |
| Protein | m1009 | CML228     | 0.10                       | 0.062                 | 0.168                 |
| Protein | m1009 | CML247     | 0.19                       | 0.001                 | 0.007*                |
| Protein | m1009 | CML277     | 0.15                       | 0.003                 | 0.020*                |
| Protein | m1009 | CML322     | 0.18                       | 0.000                 | 0.003*                |
| Protein | m1009 | CML333     | 0.05                       | 0.302                 | 0.488                 |
| Protein | m1009 | CML52      | 0.22                       | 0.000                 | 0.001**               |
| Protein | m1009 | CML69      | -0.07                      | 0.197                 | 0.365                 |
| Protein | m1009 | HP301      | 0.10                       | 0.042                 | 0.128                 |
| Protein | m1009 | Ki11       | 0.15                       | 0.004                 | 0.021*                |
| Protein | m1009 | Ki3        | 0.07                       | 0.279                 | 0.464                 |
| Protein | m1009 | Ky21       | -0.01                      | 0.882                 | 0.928                 |
| Protein | m1009 | M162W      | 0.23                       | 0.000                 | 0.001**               |
| Protein | m1009 | M37W       | 0.04                       | 0.489                 | 0.652                 |
| Protein | m1009 | Mo18W      | 0.13                       | 0.011                 | 0.048*                |
| Protein | m1009 | MS71       | 0.00                       | 0.991                 | 0.995                 |
| Protein | m1009 | NC350      | 0.05                       | 0.329                 | 0.519                 |
| Protein | m1009 | NC358      | 0.07                       | 0.197                 | 0.365                 |
| Protein | m1009 | Oh43       | 0.10                       | 0.046                 | 0.136                 |
| Protein | m1009 | Oh7B       | 0.06                       | 0.266                 | 0.446                 |
| Protein | m1009 | Tx303      | 0.00                       | 0.941                 | 0.962                 |
| Protein | m1009 | Tzi8       | 0.09                       | 0.071                 | 0.183                 |
| Protein | m1039 | B97        | -0.20                      | 0.000                 | 0.002*                |
| Protein | m1039 | CML103     | -0.23                      | 0.000                 | 0.001**               |
| Protein | m1039 | CML228     | 0.03                       | 0.511                 | 0.666                 |
| Protein | m1039 | CML247     | -0.17                      | 0.001                 | 0.007*                |
| Protein | m1039 | CML277     | 0.09                       | 0.058                 | 0.160                 |
| Protein | m1039 | CML322     | 0.05                       | 0.354                 | 0.541                 |
| Protein | m1039 | CML333     | 0.06                       | 0.249                 | 0.431                 |
| Protein | m1039 | CML52      | 0.06                       | 0.282                 | 0.468                 |
| Protein | m1039 | CML69      | 0.04                       | 0.433                 | 0.601                 |
| Protein | m1039 | HP301      | 0.01                       | 0.903                 | 0.943                 |
| Protein | m1039 | Ki11       | -0.09                      | 0.096                 | 0.225                 |

Table S6: (continued...Protein)

| Trait   | QTL   | Population | Effect <sup>a</sup><br>(%) | Raw<br><i>P-value</i> | FDR<br><i>P-value</i> |
|---------|-------|------------|----------------------------|-----------------------|-----------------------|
| Protein | m1039 | Ki3        | -0.22                      | 0.001                 | 0.011*                |
| Protein | m1039 | Ky21       | -0.01                      | 0.819                 | 0.890                 |
| Protein | m1039 | M162W      | -0.16                      | 0.003                 | 0.019*                |
| Protein | m1039 | M37W       | -0.12                      | 0.026                 | 0.097                 |
| Protein | m1039 | Mo18W      | -0.04                      | 0.483                 | 0.649                 |
| Protein | m1039 | MS71       | -0.05                      | 0.370                 | 0.556                 |
| Protein | m1039 | NC350      | 0.07                       | 0.199                 | 0.366                 |
| Protein | m1039 | NC358      | -0.18                      | 0.000                 | 0.005*                |
| Protein | m1039 | Oh43       | -0.05                      | 0.304                 | 0.488                 |
| Protein | m1039 | Oh7B       | -0.24                      | 0.000                 | 0.001*                |
| Protein | m1039 | Tx303      | -0.18                      | 0.001                 | 0.007*                |
| Protein | m1039 | Tzi8       | -0.05                      | 0.399                 | 0.572                 |
| Protein | m1084 | B97        | -0.11                      | 0.040                 | 0.126                 |
| Protein | m1084 | CML103     | -0.31                      | 0.000                 | 0.001**               |
| Protein | m1084 | CML228     | -0.10                      | 0.061                 | 0.165                 |
| Protein | m1084 | CML247     | 0.04                       | 0.486                 | 0.651                 |
| Protein | m1084 | CML277     | -0.18                      | 0.001                 | 0.011*                |
| Protein | m1084 | CML322     | -0.23                      | 0.000                 | 0.001**               |
| Protein | m1084 | CML333     | -0.12                      | 0.028                 | 0.099                 |
| Protein | m1084 | CML52      | -0.26                      | 0.000                 | 0.001**               |
| Protein | m1084 | CML69      | -0.27                      | 0.000                 | 0.001**               |
| Protein | m1084 | HP301      | -0.06                      | 0.255                 | 0.436                 |
| Protein | m1084 | Ki11       | -0.13                      | 0.030                 | 0.106                 |
| Protein | m1084 | Ki3        | -0.12                      | 0.074                 | 0.187                 |
| Protein | m1084 | Ky21       | -0.15                      | 0.012                 | 0.052                 |
| Protein | m1084 | M162W      | -0.22                      | 0.000                 | 0.001**               |
| Protein | m1084 | M37W       | -0.13                      | 0.041                 | 0.126                 |
| Protein | m1084 | Mo18W      | -0.13                      | 0.020                 | 0.078                 |
| Protein | m1084 | MS71       | -0.17                      | 0.004                 | 0.021*                |
| Protein | m1084 | NC350      | -0.12                      | 0.022                 | 0.086                 |
| Protein | m1084 | NC358      | -0.15                      | 0.006                 | 0.029*                |
| Protein | m1084 | Oh43       | -0.16                      | 0.005                 | 0.026*                |
| Protein | m1084 | Oh7B       | -0.12                      | 0.047                 | 0.138                 |
| Protein | m1084 | Tx303      | -0.22                      | 0.000                 | 0.001*                |
| Protein | m1084 | Tzi8       | -0.18                      | 0.002                 | 0.012*                |
| Protein | m1106 | B97        | 0.05                       | 0.427                 | 0.598                 |



Table S6: (continued...Protein)

| Trait   | QTL   | Population | Effect <sup>a</sup><br>(%) | Raw<br><i>P-value</i> | FDR<br><i>P-value</i> |
|---------|-------|------------|----------------------------|-----------------------|-----------------------|
| Protein | m1106 | CML103     | 0.06                       | 0.240                 | 0.418                 |
| Protein | m1106 | CML228     | 0.15                       | 0.002                 | 0.015*                |
| Protein | m1106 | CML247     | 0.03                       | 0.553                 | 0.694                 |
| Protein | m1106 | CML277     | -0.06                      | 0.237                 | 0.415                 |
| Protein | m1106 | CML322     | 0.06                       | 0.225                 | 0.401                 |
| Protein | m1106 | CML333     | 0.21                       | 0.000                 | 0.004*                |
| Protein | m1106 | CML52      | -0.08                      | 0.178                 | 0.344                 |
| Protein | m1106 | CML69      | 0.09                       | 0.118                 | 0.257                 |
| Protein | m1106 | HP301      | -0.04                      | 0.478                 | 0.644                 |
| Protein | m1106 | Ki11       | -0.01                      | 0.928                 | 0.955                 |
| Protein | m1106 | Ki3        | 0.04                       | 0.504                 | 0.662                 |
| Protein | m1106 | Ky21       | -0.04                      | 0.360                 | 0.546                 |
| Protein | m1106 | M162W      | 0.12                       | 0.050                 | 0.145                 |
| Protein | m1106 | M37W       | 0.19                       | 0.000                 | 0.002*                |
| Protein | m1106 | Mo18W      | 0.03                       | 0.583                 | 0.715                 |
| Protein | m1106 | MS71       | 0.24                       | 0.000                 | 0.001**               |
| Protein | m1106 | NC350      | 0.08                       | 0.095                 | 0.224                 |
| Protein | m1106 | NC358      | 0.06                       | 0.196                 | 0.364                 |
| Protein | m1106 | Oh43       | 0.05                       | 0.434                 | 0.601                 |
| Protein | m1106 | Oh7B       | 0.03                       | 0.531                 | 0.678                 |
| Protein | m1106 | Tx303      | 0.00                       | 0.953                 | 0.969                 |
| Protein | m1106 | Tzi8       | 0.04                       | 0.527                 | 0.678                 |

<sup>a</sup>Percent oil kernel composition on a dry matter basis relative to B73.

\* FDR:  $P \leq 0.05$

\*\* FDR:  $P \leq 0.001$

Table S7: NAM joint-linkage mapping analysis QTL allelic effects summary for percent oil content on a dry matter basis.

| Trait | QTL | Population | Effect <sup>a</sup><br>(%) | Raw<br><i>P-value</i> | FDR<br><i>P-value</i> |
|-------|-----|------------|----------------------------|-----------------------|-----------------------|
| Oil   | m23 | B97        | 0.06                       | 0.003                 | 0.020*                |
| Oil   | m23 | CML103     | 0.01                       | 0.751                 | 0.837                 |
| Oil   | m23 | CML228     | 0.05                       | 0.018                 | 0.072                 |
| Oil   | m23 | CML247     | -0.03                      | 0.233                 | 0.405                 |
| Oil   | m23 | CML277     | 0.01                       | 0.538                 | 0.696                 |
| Oil   | m23 | CML322     | 0.03                       | 0.142                 | 0.287                 |
| Oil   | m23 | CML333     | 0.04                       | 0.107                 | 0.243                 |
| Oil   | m23 | CML52      | 0.10                       | 0.000                 | 0.001**               |
| Oil   | m23 | CML69      | 0.10                       | 0.000                 | 0.001**               |
| Oil   | m23 | HP301      | -0.01                      | 0.654                 | 0.768                 |
| Oil   | m23 | Ki11       | -0.01                      | 0.642                 | 0.765                 |
| Oil   | m23 | Ki3        | 0.02                       | 0.566                 | 0.720                 |
| Oil   | m23 | Ky21       | 0.03                       | 0.140                 | 0.286                 |
| Oil   | m23 | M162W      | 0.04                       | 0.062                 | 0.166                 |
| Oil   | m23 | M37W       | 0.05                       | 0.013                 | 0.058                 |
| Oil   | m23 | Mo18W      | 0.04                       | 0.049                 | 0.142                 |
| Oil   | m23 | MS71       | -0.06                      | 0.009                 | 0.042*                |
| Oil   | m23 | NC350      | 0.03                       | 0.242                 | 0.419                 |
| Oil   | m23 | NC358      | 0.02                       | 0.372                 | 0.549                 |
| Oil   | m23 | Oh43       | -0.04                      | 0.104                 | 0.238                 |
| Oil   | m23 | Oh7B       | 0.01                       | 0.766                 | 0.848                 |
| Oil   | m23 | Tx303      | 0.10                       | 0.000                 | 0.001**               |
| Oil   | m23 | Tzi8       | 0.10                       | 0.000                 | 0.001**               |
| Oil   | m94 | B97        | -0.02                      | 0.375                 | 0.549                 |
| Oil   | m94 | CML103     | 0.00                       | 0.843                 | 0.903                 |
| Oil   | m94 | CML228     | 0.11                       | 0.000                 | 0.001**               |
| Oil   | m94 | CML247     | -0.02                      | 0.408                 | 0.583                 |
| Oil   | m94 | CML277     | 0.06                       | 0.018                 | 0.074                 |
| Oil   | m94 | CML322     | 0.08                       | 0.001                 | 0.006*                |
| Oil   | m94 | CML333     | 0.12                       | 0.000                 | 0.001**               |
| Oil   | m94 | CML52      | 0.07                       | 0.002                 | 0.016*                |
| Oil   | m94 | CML69      | 0.04                       | 0.086                 | 0.204                 |
| Oil   | m94 | HP301      | 0.03                       | 0.163                 | 0.317                 |
| Oil   | m94 | Ki11       | 0.04                       | 0.065                 | 0.171                 |
| Oil   | m94 | Ki3        | 0.05                       | 0.066                 | 0.171                 |
| Oil   | m94 | Ky21       | 0.04                       | 0.044                 | 0.132                 |

Table S7: (continued...Oil)

| Trait | QTL  | Population | Effect <sup>a</sup><br>(%) | Raw<br><i>P-value</i> | FDR<br><i>P-value</i> |
|-------|------|------------|----------------------------|-----------------------|-----------------------|
| Oil   | m94  | M162W      | 0.01                       | 0.572                 | 0.724                 |
| Oil   | m94  | M37W       | 0.05                       | 0.053                 | 0.149                 |
| Oil   | m94  | Mo18W      | 0.02                       | 0.499                 | 0.661                 |
| Oil   | m94  | MS71       | 0.03                       | 0.234                 | 0.405                 |
| Oil   | m94  | NC350      | 0.05                       | 0.042                 | 0.129                 |
| Oil   | m94  | NC358      | 0.04                       | 0.122                 | 0.261                 |
| Oil   | m94  | Oh43       | 0.00                       | 0.912                 | 0.943                 |
| Oil   | m94  | Oh7B       | -0.04                      | 0.142                 | 0.287                 |
| Oil   | m94  | Tx303      | 0.05                       | 0.035                 | 0.112                 |
| Oil   | m94  | Tzi8       | 0.06                       | 0.013                 | 0.057                 |
| Oil   | m118 | B97        | 0.04                       | 0.055                 | 0.152                 |
| Oil   | m118 | CML103     | -0.04                      | 0.079                 | 0.194                 |
| Oil   | m118 | CML228     | 0.05                       | 0.079                 | 0.194                 |
| Oil   | m118 | CML247     | 0.03                       | 0.255                 | 0.434                 |
| Oil   | m118 | CML277     | 0.04                       | 0.101                 | 0.234                 |
| Oil   | m118 | CML322     | -0.04                      | 0.083                 | 0.201                 |
| Oil   | m118 | CML333     | -0.03                      | 0.360                 | 0.545                 |
| Oil   | m118 | CML52      | -0.05                      | 0.023                 | 0.086                 |
| Oil   | m118 | CML69      | -0.02                      | 0.530                 | 0.689                 |
| Oil   | m118 | HP301      | 0.05                       | 0.044                 | 0.132                 |
| Oil   | m118 | Ki11       | -0.08                      | 0.001                 | 0.007*                |
| Oil   | m118 | Ki3        | 0.07                       | 0.017                 | 0.070                 |
| Oil   | m118 | Ky21       | 0.04                       | 0.118                 | 0.261                 |
| Oil   | m118 | M162W      | -0.05                      | 0.034                 | 0.112                 |
| Oil   | m118 | M37W       | -0.04                      | 0.075                 | 0.187                 |
| Oil   | m118 | Mo18W      | 0.05                       | 0.056                 | 0.153                 |
| Oil   | m118 | MS71       | 0.01                       | 0.656                 | 0.768                 |
| Oil   | m118 | NC350      | 0.00                       | 0.973                 | 0.985                 |
| Oil   | m118 | NC358      | -0.01                      | 0.555                 | 0.711                 |
| Oil   | m118 | Oh43       | 0.02                       | 0.486                 | 0.651                 |
| Oil   | m118 | Oh7B       | 0.08                       | 0.001                 | 0.010*                |
| Oil   | m118 | Tx303      | 0.01                       | 0.605                 | 0.736                 |
| Oil   | m118 | Tzi8       | 0.03                       | 0.191                 | 0.354                 |
| Oil   | m170 | B97        | 0.03                       | 0.122                 | 0.261                 |
| Oil   | m170 | CML103     | 0.03                       | 0.124                 | 0.264                 |
| Oil   | m170 | CML228     | 0.00                       | 0.951                 | 0.971                 |
| Oil   | m170 | CML247     | 0.05                       | 0.034                 | 0.112                 |

Table S7: (continued...Oil)

| Trait | QTL  | Population | Effect <sup>a</sup><br>(%) | Raw<br><i>P-value</i> | FDR<br><i>P-value</i> |
|-------|------|------------|----------------------------|-----------------------|-----------------------|
| Oil   | m170 | CML277     | 0.00                       | 0.946                 | 0.968                 |
| Oil   | m170 | CML322     | 0.04                       | 0.099                 | 0.231                 |
| Oil   | m170 | CML333     | 0.04                       | 0.062                 | 0.166                 |
| Oil   | m170 | CML52      | 0.04                       | 0.054                 | 0.150                 |
| Oil   | m170 | CML69      | 0.02                       | 0.293                 | 0.475                 |
| Oil   | m170 | HP301      | 0.07                       | 0.001                 | 0.008*                |
| Oil   | m170 | Ki11       | 0.04                       | 0.119                 | 0.261                 |
| Oil   | m170 | Ki3        | 0.02                       | 0.479                 | 0.650                 |
| Oil   | m170 | Ky21       | 0.01                       | 0.602                 | 0.736                 |
| Oil   | m170 | M162W      | 0.07                       | 0.003                 | 0.016*                |
| Oil   | m170 | M37W       | 0.02                       | 0.260                 | 0.436                 |
| Oil   | m170 | Mo18W      | 0.05                       | 0.026                 | 0.094                 |
| Oil   | m170 | MS71       | 0.06                       | 0.003                 | 0.018*                |
| Oil   | m170 | NC350      | 0.04                       | 0.055                 | 0.152                 |
| Oil   | m170 | NC358      | 0.04                       | 0.124                 | 0.264                 |
| Oil   | m170 | Oh43       | 0.11                       | 0.000                 | 0.001**               |
| Oil   | m170 | Oh7B       | 0.06                       | 0.010                 | 0.046*                |
| Oil   | m170 | Tx303      | 0.06                       | 0.005                 | 0.028*                |
| Oil   | m170 | Tzi8       | 0.03                       | 0.260                 | 0.436                 |
| Oil   | m221 | B97        | 0.02                       | 0.431                 | 0.605                 |
| Oil   | m221 | CML103     | 0.02                       | 0.591                 | 0.734                 |
| Oil   | m221 | CML228     | -0.07                      | 0.007                 | 0.033*                |
| Oil   | m221 | CML247     | -0.02                      | 0.417                 | 0.593                 |
| Oil   | m221 | CML277     | -0.08                      | 0.001                 | 0.010*                |
| Oil   | m221 | CML322     | -0.06                      | 0.016                 | 0.067                 |
| Oil   | m221 | CML333     | -0.10                      | 0.000                 | 0.003*                |
| Oil   | m221 | CML52      | -0.03                      | 0.260                 | 0.436                 |
| Oil   | m221 | CML69      | -0.01                      | 0.680                 | 0.791                 |
| Oil   | m221 | HP301      | -0.10                      | 0.000                 | 0.001**               |
| Oil   | m221 | Ki11       | 0.02                       | 0.327                 | 0.514                 |
| Oil   | m221 | Ki3        | -0.01                      | 0.826                 | 0.889                 |
| Oil   | m221 | Ky21       | 0.00                       | 0.947                 | 0.968                 |
| Oil   | m221 | M162W      | 0.04                       | 0.172                 | 0.330                 |
| Oil   | m221 | M37W       | -0.06                      | 0.040                 | 0.125                 |
| Oil   | m221 | Mo18W      | 0.02                       | 0.541                 | 0.698                 |
| Oil   | m221 | MS71       | -0.10                      | 0.000                 | 0.004*                |
| Oil   | m221 | NC350      | -0.01                      | 0.645                 | 0.765                 |

Table S7: (continued...Oil)

| Trait | QTL  | Population | Effect <sup>a</sup><br>(%) | Raw<br><i>P-value</i> | FDR<br><i>P-value</i> |
|-------|------|------------|----------------------------|-----------------------|-----------------------|
| Oil   | m221 | NC358      | -0.03                      | 0.308                 | 0.490                 |
| Oil   | m221 | Oh43       | -0.03                      | 0.230                 | 0.402                 |
| Oil   | m221 | Oh7B       | -0.06                      | 0.030                 | 0.103                 |
| Oil   | m221 | Tx303      | 0.01                       | 0.729                 | 0.821                 |
| Oil   | m221 | Tzi8       | -0.07                      | 0.022                 | 0.085                 |
| Oil   | m240 | B97        | -0.04                      | 0.106                 | 0.241                 |
| Oil   | m240 | CML103     | -0.10                      | 0.001                 | 0.005*                |
| Oil   | m240 | CML228     | 0.06                       | 0.022                 | 0.084                 |
| Oil   | m240 | CML247     | 0.00                       | 0.891                 | 0.929                 |
| Oil   | m240 | CML277     | 0.03                       | 0.226                 | 0.398                 |
| Oil   | m240 | CML322     | -0.02                      | 0.482                 | 0.650                 |
| Oil   | m240 | CML333     | 0.01                       | 0.585                 | 0.731                 |
| Oil   | m240 | CML52      | -0.09                      | 0.001                 | 0.007*                |
| Oil   | m240 | CML69      | -0.11                      | 0.000                 | 0.001**               |
| Oil   | m240 | HP301      | 0.00                       | 0.945                 | 0.968                 |
| Oil   | m240 | Ki11       | -0.02                      | 0.467                 | 0.637                 |
| Oil   | m240 | Ki3        | 0.01                       | 0.823                 | 0.888                 |
| Oil   | m240 | Ky21       | -0.05                      | 0.158                 | 0.308                 |
| Oil   | m240 | M162W      | -0.11                      | 0.000                 | 0.002*                |
| Oil   | m240 | M37W       | 0.03                       | 0.329                 | 0.514                 |
| Oil   | m240 | Mo18W      | 0.05                       | 0.120                 | 0.261                 |
| Oil   | m240 | MS71       | 0.05                       | 0.126                 | 0.266                 |
| Oil   | m240 | NC350      | -0.10                      | 0.001                 | 0.005*                |
| Oil   | m240 | NC358      | -0.02                      | 0.435                 | 0.608                 |
| Oil   | m240 | Oh43       | -0.05                      | 0.053                 | 0.149                 |
| Oil   | m240 | Oh7B       | -0.01                      | 0.637                 | 0.764                 |
| Oil   | m240 | Tx303      | 0.01                       | 0.822                 | 0.888                 |
| Oil   | m240 | Tzi8       | 0.06                       | 0.069                 | 0.174                 |
| Oil   | m266 | B97        | 0.01                       | 0.647                 | 0.765                 |
| Oil   | m266 | CML103     | 0.03                       | 0.266                 | 0.440                 |
| Oil   | m266 | CML228     | 0.07                       | 0.001                 | 0.007*                |
| Oil   | m266 | CML247     | 0.01                       | 0.683                 | 0.792                 |
| Oil   | m266 | CML277     | 0.00                       | 0.963                 | 0.979                 |
| Oil   | m266 | CML322     | -0.04                      | 0.082                 | 0.200                 |
| Oil   | m266 | CML333     | 0.07                       | 0.002                 | 0.011*                |
| Oil   | m266 | CML52      | -0.03                      | 0.145                 | 0.290                 |
| Oil   | m266 | CML69      | 0.02                       | 0.325                 | 0.513                 |

Table S7: (continued...Oil)

| Trait | QTL  | Population | Effect <sup>a</sup><br>(%) | Raw<br><i>P-value</i> | FDR<br><i>P-value</i> |
|-------|------|------------|----------------------------|-----------------------|-----------------------|
| Oil   | m266 | HP301      | -0.01                      | 0.696                 | 0.797                 |
| Oil   | m266 | Ki11       | 0.01                       | 0.737                 | 0.827                 |
| Oil   | m266 | Ki3        | 0.04                       | 0.118                 | 0.261                 |
| Oil   | m266 | Ky21       | -0.07                      | 0.005                 | 0.025*                |
| Oil   | m266 | M162W      | 0.03                       | 0.248                 | 0.424                 |
| Oil   | m266 | M37W       | -0.01                      | 0.578                 | 0.730                 |
| Oil   | m266 | Mo18W      | -0.04                      | 0.083                 | 0.201                 |
| Oil   | m266 | MS71       | -0.04                      | 0.121                 | 0.261                 |
| Oil   | m266 | NC350      | 0.02                       | 0.500                 | 0.661                 |
| Oil   | m266 | NC358      | -0.05                      | 0.034                 | 0.112                 |
| Oil   | m266 | Oh43       | -0.02                      | 0.303                 | 0.485                 |
| Oil   | m266 | Oh7B       | 0.01                       | 0.656                 | 0.768                 |
| Oil   | m266 | Tx303      | -0.09                      | 0.000                 | 0.001**               |
| Oil   | m266 | Tzi8       | -0.03                      | 0.211                 | 0.382                 |
| Oil   | m330 | B97        | 0.02                       | 0.366                 | 0.549                 |
| Oil   | m330 | CML103     | -0.01                      | 0.644                 | 0.765                 |
| Oil   | m330 | CML228     | 0.06                       | 0.006                 | 0.032*                |
| Oil   | m330 | CML247     | -0.03                      | 0.108                 | 0.243                 |
| Oil   | m330 | CML277     | -0.04                      | 0.051                 | 0.145                 |
| Oil   | m330 | CML322     | 0.05                       | 0.018                 | 0.074                 |
| Oil   | m330 | CML333     | 0.00                       | 0.894                 | 0.929                 |
| Oil   | m330 | CML52      | 0.01                       | 0.599                 | 0.736                 |
| Oil   | m330 | CML69      | -0.05                      | 0.024                 | 0.089                 |
| Oil   | m330 | HP301      | 0.06                       | 0.005                 | 0.026*                |
| Oil   | m330 | Ki11       | 0.00                       | 0.990                 | 0.994                 |
| Oil   | m330 | Ki3        | -0.07                      | 0.008                 | 0.040*                |
| Oil   | m330 | Ky21       | -0.08                      | 0.000                 | 0.002*                |
| Oil   | m330 | M162W      | -0.05                      | 0.051                 | 0.145                 |
| Oil   | m330 | M37W       | -0.02                      | 0.383                 | 0.556                 |
| Oil   | m330 | Mo18W      | -0.04                      | 0.067                 | 0.171                 |
| Oil   | m330 | MS71       | 0.00                       | 0.820                 | 0.888                 |
| Oil   | m330 | NC350      | 0.06                       | 0.008                 | 0.040*                |
| Oil   | m330 | NC358      | -0.01                      | 0.530                 | 0.689                 |
| Oil   | m330 | Oh43       | -0.10                      | 0.000                 | 0.001**               |
| Oil   | m330 | Oh7B       | -0.05                      | 0.029                 | 0.102                 |
| Oil   | m330 | Tx303      | 0.02                       | 0.494                 | 0.658                 |
| Oil   | m330 | Tzi8       | 0.05                       | 0.017                 | 0.071                 |

Table S7: (continued...Oil)

| Trait | QTL  | Population | Effect <sup>a</sup><br>(%) | Raw<br><i>P-value</i> | FDR<br><i>P-value</i> |
|-------|------|------------|----------------------------|-----------------------|-----------------------|
| Oil   | m401 | B97        | 0.04                       | 0.127                 | 0.268                 |
| Oil   | m401 | CML103     | 0.04                       | 0.065                 | 0.171                 |
| Oil   | m401 | CML228     | 0.05                       | 0.014                 | 0.059                 |
| Oil   | m401 | CML247     | 0.03                       | 0.129                 | 0.269                 |
| Oil   | m401 | CML277     | 0.11                       | 0.000                 | 0.001**               |
| Oil   | m401 | CML322     | 0.11                       | 0.000                 | 0.001**               |
| Oil   | m401 | CML333     | 0.08                       | 0.001                 | 0.005*                |
| Oil   | m401 | CML52      | -0.01                      | 0.788                 | 0.868                 |
| Oil   | m401 | CML69      | 0.04                       | 0.055                 | 0.152                 |
| Oil   | m401 | HP301      | -0.02                      | 0.293                 | 0.475                 |
| Oil   | m401 | Ki11       | 0.04                       | 0.042                 | 0.129                 |
| Oil   | m401 | Ki3        | 0.07                       | 0.010                 | 0.047*                |
| Oil   | m401 | Ky21       | -0.02                      | 0.429                 | 0.603                 |
| Oil   | m401 | M162W      | -0.05                      | 0.032                 | 0.109                 |
| Oil   | m401 | M37W       | 0.06                       | 0.011                 | 0.048*                |
| Oil   | m401 | Mo18W      | 0.04                       | 0.103                 | 0.238                 |
| Oil   | m401 | MS71       | -0.02                      | 0.420                 | 0.593                 |
| Oil   | m401 | NC350      | -0.01                      | 0.583                 | 0.731                 |
| Oil   | m401 | NC358      | -0.03                      | 0.245                 | 0.422                 |
| Oil   | m401 | Oh43       | 0.00                       | 0.863                 | 0.915                 |
| Oil   | m401 | Oh7B       | 0.00                       | 0.910                 | 0.943                 |
| Oil   | m401 | Tx303      | 0.06                       | 0.004                 | 0.023*                |
| Oil   | m401 | Tzi8       | 0.02                       | 0.491                 | 0.656                 |
| Oil   | m474 | B97        | 0.03                       | 0.200                 | 0.369                 |
| Oil   | m474 | CML103     | 0.01                       | 0.685                 | 0.792                 |
| Oil   | m474 | CML228     | 0.10                       | 0.000                 | 0.001**               |
| Oil   | m474 | CML247     | 0.02                       | 0.508                 | 0.666                 |
| Oil   | m474 | CML277     | -0.01                      | 0.657                 | 0.768                 |
| Oil   | m474 | CML322     | 0.11                       | 0.000                 | 0.001**               |
| Oil   | m474 | CML333     | 0.00                       | 0.980                 | 0.988                 |
| Oil   | m474 | CML52      | 0.01                       | 0.571                 | 0.724                 |
| Oil   | m474 | CML69      | 0.03                       | 0.224                 | 0.398                 |
| Oil   | m474 | HP301      | 0.03                       | 0.295                 | 0.475                 |
| Oil   | m474 | Ki11       | -0.01                      | 0.684                 | 0.792                 |
| Oil   | m474 | Ki3        | 0.07                       | 0.026                 | 0.095                 |
| Oil   | m474 | Ky21       | -0.02                      | 0.344                 | 0.531                 |
| Oil   | m474 | M162W      | 0.02                       | 0.421                 | 0.593                 |

Table S7: (continued...Oil)

| Trait | QTL  | Population | Effect <sup>a</sup><br>(%) | Raw<br><i>P-value</i> | FDR<br><i>P-value</i> |
|-------|------|------------|----------------------------|-----------------------|-----------------------|
| Oil   | m474 | M37W       | -0.05                      | 0.042                 | 0.129                 |
| Oil   | m474 | Mo18W      | -0.02                      | 0.403                 | 0.581                 |
| Oil   | m474 | MS71       | -0.06                      | 0.021                 | 0.083                 |
| Oil   | m474 | NC350      | 0.04                       | 0.103                 | 0.238                 |
| Oil   | m474 | NC358      | 0.03                       | 0.297                 | 0.478                 |
| Oil   | m474 | Oh43       | -0.04                      | 0.088                 | 0.207                 |
| Oil   | m474 | Oh7B       | 0.12                       | 0.001                 | 0.006*                |
| Oil   | m474 | Tx303      | 0.02                       | 0.449                 | 0.622                 |
| Oil   | m474 | Tzi8       | 0.12                       | 0.000                 | 0.001**               |
| Oil   | m492 | B97        | 0.04                       | 0.150                 | 0.297                 |
| Oil   | m492 | CML103     | 0.06                       | 0.022                 | 0.084                 |
| Oil   | m492 | CML228     | 0.10                       | 0.000                 | 0.001**               |
| Oil   | m492 | CML247     | 0.02                       | 0.457                 | 0.629                 |
| Oil   | m492 | CML277     | 0.02                       | 0.375                 | 0.549                 |
| Oil   | m492 | CML322     | 0.03                       | 0.153                 | 0.300                 |
| Oil   | m492 | CML333     | 0.05                       | 0.061                 | 0.166                 |
| Oil   | m492 | CML52      | 0.03                       | 0.225                 | 0.398                 |
| Oil   | m492 | CML69      | 0.03                       | 0.175                 | 0.332                 |
| Oil   | m492 | HP301      | 0.01                       | 0.819                 | 0.888                 |
| Oil   | m492 | Ki11       | 0.06                       | 0.033                 | 0.110                 |
| Oil   | m492 | Ki3        | 0.06                       | 0.065                 | 0.171                 |
| Oil   | m492 | Ky21       | -0.03                      | 0.262                 | 0.437                 |
| Oil   | m492 | M162W      | -0.03                      | 0.337                 | 0.521                 |
| Oil   | m492 | M37W       | -0.01                      | 0.557                 | 0.711                 |
| Oil   | m492 | Mo18W      | 0.03                       | 0.308                 | 0.490                 |
| Oil   | m492 | MS71       | 0.02                       | 0.407                 | 0.583                 |
| Oil   | m492 | NC350      | 0.06                       | 0.009                 | 0.043*                |
| Oil   | m492 | NC358      | 0.11                       | 0.000                 | 0.001**               |
| Oil   | m492 | Oh43       | 0.02                       | 0.329                 | 0.514                 |
| Oil   | m492 | Oh7B       | -0.01                      | 0.873                 | 0.918                 |
| Oil   | m492 | Tx303      | 0.00                       | 0.867                 | 0.916                 |
| Oil   | m492 | Tzi8       | -0.03                      | 0.270                 | 0.445                 |
| Oil   | m538 | B97        | 0.03                       | 0.209                 | 0.381                 |
| Oil   | m538 | CML103     | -0.02                      | 0.372                 | 0.549                 |
| Oil   | m538 | CML228     | -0.01                      | 0.818                 | 0.888                 |
| Oil   | m538 | CML247     | -0.06                      | 0.010                 | 0.047*                |
| Oil   | m538 | CML277     | -0.07                      | 0.001                 | 0.007*                |



Table S7: (continued...Oil)

| Trait | QTL  | Population | Effect <sup>a</sup><br>(%) | Raw<br><i>P-value</i> | FDR<br><i>P-value</i> |
|-------|------|------------|----------------------------|-----------------------|-----------------------|
| Oil   | m538 | CML322     | -0.10                      | 0.000                 | 0.001**               |
| Oil   | m538 | CML333     | -0.04                      | 0.047                 | 0.138                 |
| Oil   | m538 | CML52      | -0.05                      | 0.024                 | 0.090                 |
| Oil   | m538 | CML69      | -0.03                      | 0.222                 | 0.396                 |
| Oil   | m538 | HP301      | 0.01                       | 0.592                 | 0.734                 |
| Oil   | m538 | Ki11       | -0.01                      | 0.588                 | 0.733                 |
| Oil   | m538 | Ki3        | 0.00                       | 0.954                 | 0.972                 |
| Oil   | m538 | Ky21       | -0.04                      | 0.049                 | 0.142                 |
| Oil   | m538 | M162W      | 0.00                       | 0.865                 | 0.915                 |
| Oil   | m538 | M37W       | -0.05                      | 0.023                 | 0.088                 |
| Oil   | m538 | Mo18W      | -0.05                      | 0.036                 | 0.115                 |
| Oil   | m538 | MS71       | -0.01                      | 0.663                 | 0.773                 |
| Oil   | m538 | NC350      | -0.05                      | 0.018                 | 0.074                 |
| Oil   | m538 | NC358      | -0.03                      | 0.179                 | 0.338                 |
| Oil   | m538 | Oh43       | -0.04                      | 0.083                 | 0.201                 |
| Oil   | m538 | Oh7B       | 0.01                       | 0.723                 | 0.818                 |
| Oil   | m538 | Tx303      | -0.07                      | 0.003                 | 0.016*                |
| Oil   | m538 | Tzi8       | 0.00                       | 0.991                 | 0.994                 |
| Oil   | m553 | B97        | 0.00                       | 0.888                 | 0.929                 |
| Oil   | m553 | CML103     | -0.03                      | 0.190                 | 0.354                 |
| Oil   | m553 | CML228     | 0.03                       | 0.265                 | 0.439                 |
| Oil   | m553 | CML247     | 0.07                       | 0.001                 | 0.008*                |
| Oil   | m553 | CML277     | 0.01                       | 0.744                 | 0.831                 |
| Oil   | m553 | CML322     | 0.10                       | 0.000                 | 0.001**               |
| Oil   | m553 | CML333     | 0.04                       | 0.093                 | 0.218                 |
| Oil   | m553 | CML52      | 0.00                       | 0.992                 | 0.994                 |
| Oil   | m553 | CML69      | 0.04                       | 0.066                 | 0.171                 |
| Oil   | m553 | HP301      | 0.04                       | 0.153                 | 0.300                 |
| Oil   | m553 | Ki11       | -0.01                      | 0.653                 | 0.768                 |
| Oil   | m553 | Ki3        | 0.02                       | 0.470                 | 0.639                 |
| Oil   | m553 | Ky21       | 0.02                       | 0.404                 | 0.581                 |
| Oil   | m553 | M162W      | -0.02                      | 0.351                 | 0.538                 |
| Oil   | m553 | M37W       | 0.05                       | 0.037                 | 0.116                 |
| Oil   | m553 | Mo18W      | 0.05                       | 0.029                 | 0.102                 |
| Oil   | m553 | MS71       | -0.02                      | 0.361                 | 0.545                 |
| Oil   | m553 | NC350      | 0.04                       | 0.068                 | 0.174                 |
| Oil   | m553 | NC358      | -0.02                      | 0.542                 | 0.698                 |

Table S7: (continued...Oil)

| Trait | QTL  | Population | Effect <sup>a</sup><br>(%) | Raw<br><i>P-value</i> | FDR<br><i>P-value</i> |
|-------|------|------------|----------------------------|-----------------------|-----------------------|
| Oil   | m553 | Oh43       | 0.00                       | 0.942                 | 0.968                 |
| Oil   | m553 | Oh7B       | -0.03                      | 0.201                 | 0.369                 |
| Oil   | m553 | Tx303      | 0.06                       | 0.014                 | 0.060                 |
| Oil   | m553 | Tzi8       | -0.02                      | 0.358                 | 0.544                 |
| Oil   | m565 | B97        | 0.03                       | 0.369                 | 0.549                 |
| Oil   | m565 | CML103     | -0.01                      | 0.801                 | 0.879                 |
| Oil   | m565 | CML228     | 0.02                       | 0.455                 | 0.628                 |
| Oil   | m565 | CML247     | -0.02                      | 0.334                 | 0.518                 |
| Oil   | m565 | CML277     | -0.02                      | 0.444                 | 0.619                 |
| Oil   | m565 | CML322     | -0.01                      | 0.692                 | 0.797                 |
| Oil   | m565 | CML333     | -0.06                      | 0.028                 | 0.100                 |
| Oil   | m565 | CML52      | -0.02                      | 0.375                 | 0.549                 |
| Oil   | m565 | CML69      | -0.04                      | 0.149                 | 0.296                 |
| Oil   | m565 | HP301      | -0.02                      | 0.632                 | 0.761                 |
| Oil   | m565 | Ki11       | -0.03                      | 0.400                 | 0.580                 |
| Oil   | m565 | Ki3        | 0.01                       | 0.809                 | 0.886                 |
| Oil   | m565 | Ky21       | -0.11                      | 0.000                 | 0.001**               |
| Oil   | m565 | M162W      | -0.04                      | 0.177                 | 0.335                 |
| Oil   | m565 | M37W       | -0.11                      | 0.000                 | 0.001**               |
| Oil   | m565 | Mo18W      | 0.02                       | 0.508                 | 0.666                 |
| Oil   | m565 | MS71       | -0.05                      | 0.027                 | 0.098                 |
| Oil   | m565 | NC350      | -0.02                      | 0.466                 | 0.637                 |
| Oil   | m565 | NC358      | -0.05                      | 0.050                 | 0.145                 |
| Oil   | m565 | Oh43       | -0.09                      | 0.001                 | 0.008*                |
| Oil   | m565 | Oh7B       | 0.01                       | 0.764                 | 0.848                 |
| Oil   | m565 | Tx303      | -0.12                      | 0.000                 | 0.001**               |
| Oil   | m565 | Tzi8       | -0.02                      | 0.371                 | 0.549                 |
| Oil   | m591 | B97        | -0.04                      | 0.085                 | 0.204                 |
| Oil   | m591 | CML103     | 0.12                       | 0.000                 | 0.001**               |
| Oil   | m591 | CML228     | 0.13                       | 0.000                 | 0.001**               |
| Oil   | m591 | CML247     | 0.04                       | 0.087                 | 0.207                 |
| Oil   | m591 | CML277     | 0.05                       | 0.040                 | 0.126                 |
| Oil   | m591 | CML322     | 0.03                       | 0.282                 | 0.462                 |
| Oil   | m591 | CML333     | 0.05                       | 0.067                 | 0.171                 |
| Oil   | m591 | CML52      | 0.05                       | 0.043                 | 0.130                 |
| Oil   | m591 | CML69      | 0.12                       | 0.000                 | 0.001**               |
| Oil   | m591 | HP301      | 0.00                       | 0.929                 | 0.959                 |

Table S7: (continued...Oil)

| Trait | QTL  | Population | Effect <sup>a</sup><br>(%) | Raw<br><i>P-value</i> | FDR<br><i>P-value</i> |
|-------|------|------------|----------------------------|-----------------------|-----------------------|
| Oil   | m591 | Ki11       | 0.06                       | 0.050                 | 0.145                 |
| Oil   | m591 | Ki3        | 0.03                       | 0.446                 | 0.620                 |
| Oil   | m591 | Ky21       | 0.02                       | 0.420                 | 0.593                 |
| Oil   | m591 | M162W      | 0.07                       | 0.010                 | 0.046*                |
| Oil   | m591 | M37W       | 0.08                       | 0.004                 | 0.022*                |
| Oil   | m591 | Mo18W      | 0.04                       | 0.166                 | 0.320                 |
| Oil   | m591 | MS71       | -0.01                      | 0.580                 | 0.730                 |
| Oil   | m591 | NC350      | 0.14                       | 0.000                 | 0.001**               |
| Oil   | m591 | NC358      | 0.06                       | 0.022                 | 0.084                 |
| Oil   | m591 | Oh43       | 0.04                       | 0.141                 | 0.286                 |
| Oil   | m591 | Oh7B       | 0.12                       | 0.000                 | 0.002*                |
| Oil   | m591 | Tx303      | 0.09                       | 0.002                 | 0.011*                |
| Oil   | m591 | Tzi8       | 0.09                       | 0.001                 | 0.008*                |
| Oil   | m638 | B97        | 0.02                       | 0.510                 | 0.667                 |
| Oil   | m638 | CML103     | 0.04                       | 0.173                 | 0.330                 |
| Oil   | m638 | CML228     | -0.01                      | 0.798                 | 0.878                 |
| Oil   | m638 | CML247     | -0.02                      | 0.367                 | 0.549                 |
| Oil   | m638 | CML277     | 0.01                       | 0.698                 | 0.797                 |
| Oil   | m638 | CML322     | 0.05                       | 0.025                 | 0.091                 |
| Oil   | m638 | CML333     | 0.08                       | 0.001                 | 0.007*                |
| Oil   | m638 | CML52      | -0.03                      | 0.178                 | 0.336                 |
| Oil   | m638 | CML69      | 0.03                       | 0.233                 | 0.405                 |
| Oil   | m638 | HP301      | 0.04                       | 0.116                 | 0.260                 |
| Oil   | m638 | Ki11       | 0.01                       | 0.584                 | 0.731                 |
| Oil   | m638 | Ki3        | 0.07                       | 0.019                 | 0.077                 |
| Oil   | m638 | Ky21       | 0.10                       | 0.000                 | 0.001*                |
| Oil   | m638 | M162W      | 0.05                       | 0.056                 | 0.154                 |
| Oil   | m638 | M37W       | -0.03                      | 0.191                 | 0.354                 |
| Oil   | m638 | Mo18W      | 0.03                       | 0.184                 | 0.344                 |
| Oil   | m638 | MS71       | -0.02                      | 0.556                 | 0.711                 |
| Oil   | m638 | NC350      | 0.03                       | 0.164                 | 0.317                 |
| Oil   | m638 | NC358      | 0.01                       | 0.639                 | 0.764                 |
| Oil   | m638 | Oh43       | 0.01                       | 0.636                 | 0.764                 |
| Oil   | m638 | Oh7B       | 0.04                       | 0.219                 | 0.394                 |
| Oil   | m638 | Tx303      | -0.02                      | 0.462                 | 0.633                 |
| Oil   | m638 | Tzi8       | 0.07                       | 0.002                 | 0.015*                |
| Oil   | m708 | B97        | -0.02                      | 0.506                 | 0.666                 |

Table S7: (continued...Oil)

| Trait | QTL  | Population | Effect <sup>a</sup><br>(%) | Raw<br><i>P</i> -value | FDR<br><i>P</i> -value |
|-------|------|------------|----------------------------|------------------------|------------------------|
| Oil   | m708 | CML103     | -0.04                      | 0.153                  | 0.300                  |
| Oil   | m708 | CML228     | 0.10                       | 0.000                  | 0.001**                |
| Oil   | m708 | CML247     | 0.02                       | 0.455                  | 0.628                  |
| Oil   | m708 | CML277     | 0.01                       | 0.604                  | 0.736                  |
| Oil   | m708 | CML322     | -0.02                      | 0.353                  | 0.539                  |
| Oil   | m708 | CML333     | 0.05                       | 0.038                  | 0.121                  |
| Oil   | m708 | CML52      | 0.08                       | 0.000                  | 0.002*                 |
| Oil   | m708 | CML69      | 0.00                       | 0.996                  | 0.996                  |
| Oil   | m708 | HP301      | -0.02                      | 0.351                  | 0.538                  |
| Oil   | m708 | Ki11       | 0.01                       | 0.696                  | 0.797                  |
| Oil   | m708 | Ki3        | 0.09                       | 0.002                  | 0.014*                 |
| Oil   | m708 | Ky21       | 0.18                       | 0.000                  | 0.001**                |
| Oil   | m708 | M162W      | 0.12                       | 0.000                  | 0.001**                |
| Oil   | m708 | M37W       | -0.05                      | 0.032                  | 0.108                  |
| Oil   | m708 | Mo18W      | 0.03                       | 0.290                  | 0.473                  |
| Oil   | m708 | MS71       | -0.02                      | 0.401                  | 0.580                  |
| Oil   | m708 | NC350      | 0.09                       | 0.001                  | 0.010*                 |
| Oil   | m708 | NC358      | -0.01                      | 0.814                  | 0.888                  |
| Oil   | m708 | Oh43       | -0.04                      | 0.126                  | 0.266                  |
| Oil   | m708 | Oh7B       | 0.16                       | 0.000                  | 0.001**                |
| Oil   | m708 | Tx303      | 0.21                       | 0.000                  | 0.001**                |
| Oil   | m708 | Tzi8       | 0.12                       | 0.000                  | 0.001**                |
| Oil   | m739 | B97        | 0.01                       | 0.557                  | 0.711                  |
| Oil   | m739 | CML103     | 0.00                       | 0.947                  | 0.968                  |
| Oil   | m739 | CML228     | 0.02                       | 0.416                  | 0.593                  |
| Oil   | m739 | CML247     | -0.04                      | 0.141                  | 0.286                  |
| Oil   | m739 | CML277     | 0.03                       | 0.144                  | 0.289                  |
| Oil   | m739 | CML322     | 0.00                       | 0.893                  | 0.929                  |
| Oil   | m739 | CML333     | 0.03                       | 0.217                  | 0.391                  |
| Oil   | m739 | CML52      | 0.02                       | 0.265                  | 0.439                  |
| Oil   | m739 | CML69      | -0.03                      | 0.132                  | 0.274                  |
| Oil   | m739 | HP301      | 0.05                       | 0.030                  | 0.103                  |
| Oil   | m739 | Ki11       | 0.00                       | 0.967                  | 0.981                  |
| Oil   | m739 | Ki3        | -0.07                      | 0.011                  | 0.048*                 |
| Oil   | m739 | Ky21       | 0.04                       | 0.094                  | 0.221                  |
| Oil   | m739 | M162W      | -0.01                      | 0.743                  | 0.831                  |
| Oil   | m739 | M37W       | -0.02                      | 0.378                  | 0.551                  |

Table S7: (continued...Oil)

| Trait | QTL  | Population | Effect <sup>a</sup><br>(%) | Raw<br><i>P-value</i> | FDR<br><i>P-value</i> |
|-------|------|------------|----------------------------|-----------------------|-----------------------|
| Oil   | m739 | Mo18W      | 0.04                       | 0.140                 | 0.286                 |
| Oil   | m739 | MS71       | 0.03                       | 0.134                 | 0.276                 |
| Oil   | m739 | NC350      | -0.01                      | 0.627                 | 0.757                 |
| Oil   | m739 | NC358      | -0.03                      | 0.260                 | 0.436                 |
| Oil   | m739 | Oh43       | 0.05                       | 0.034                 | 0.112                 |
| Oil   | m739 | Oh7B       | 0.06                       | 0.031                 | 0.105                 |
| Oil   | m739 | Tx303      | 0.07                       | 0.005                 | 0.026*                |
| Oil   | m739 | Tzi8       | 0.12                       | 0.000                 | 0.001**               |
| Oil   | m793 | B97        | -0.02                      | 0.484                 | 0.650                 |
| Oil   | m793 | CML103     | 0.02                       | 0.255                 | 0.434                 |
| Oil   | m793 | CML228     | 0.06                       | 0.006                 | 0.029*                |
| Oil   | m793 | CML247     | 0.01                       | 0.535                 | 0.694                 |
| Oil   | m793 | CML277     | 0.05                       | 0.022                 | 0.084                 |
| Oil   | m793 | CML322     | -0.02                      | 0.274                 | 0.450                 |
| Oil   | m793 | CML333     | 0.01                       | 0.645                 | 0.765                 |
| Oil   | m793 | CML52      | 0.04                       | 0.045                 | 0.132                 |
| Oil   | m793 | CML69      | 0.03                       | 0.181                 | 0.340                 |
| Oil   | m793 | HP301      | 0.01                       | 0.612                 | 0.742                 |
| Oil   | m793 | Ki11       | 0.04                       | 0.074                 | 0.185                 |
| Oil   | m793 | Ki3        | 0.08                       | 0.004                 | 0.023*                |
| Oil   | m793 | Ky21       | 0.03                       | 0.128                 | 0.268                 |
| Oil   | m793 | M162W      | 0.04                       | 0.067                 | 0.171                 |
| Oil   | m793 | M37W       | -0.01                      | 0.732                 | 0.823                 |
| Oil   | m793 | Mo18W      | 0.00                       | 0.873                 | 0.918                 |
| Oil   | m793 | MS71       | 0.08                       | 0.000                 | 0.004*                |
| Oil   | m793 | NC350      | 0.04                       | 0.073                 | 0.184                 |
| Oil   | m793 | NC358      | 0.07                       | 0.001                 | 0.008*                |
| Oil   | m793 | Oh43       | 0.01                       | 0.752                 | 0.837                 |
| Oil   | m793 | Oh7B       | 0.03                       | 0.224                 | 0.398                 |
| Oil   | m793 | Tx303      | 0.02                       | 0.294                 | 0.475                 |
| Oil   | m793 | Tzi8       | 0.01                       | 0.712                 | 0.810                 |
| Oil   | m918 | B97        | -0.01                      | 0.595                 | 0.734                 |
| Oil   | m918 | CML103     | 0.00                       | 0.844                 | 0.903                 |
| Oil   | m918 | CML228     | 0.06                       | 0.006                 | 0.032*                |
| Oil   | m918 | CML247     | 0.01                       | 0.713                 | 0.810                 |
| Oil   | m918 | CML277     | -0.01                      | 0.600                 | 0.736                 |
| Oil   | m918 | CML322     | 0.10                       | 0.000                 | 0.001**               |

Table S7: (continued...Oil)

| Trait | QTL  | Population | Effect <sup>a</sup><br>(%) | Raw<br><i>P-value</i> | FDR<br><i>P-value</i> |
|-------|------|------------|----------------------------|-----------------------|-----------------------|
| Oil   | m918 | CML333     | 0.11                       | 0.000                 | 0.001**               |
| Oil   | m918 | CML52      | 0.08                       | 0.000                 | 0.003*                |
| Oil   | m918 | CML69      | 0.12                       | 0.000                 | 0.001**               |
| Oil   | m918 | HP301      | 0.03                       | 0.119                 | 0.261                 |
| Oil   | m918 | Ki11       | 0.00                       | 0.862                 | 0.915                 |
| Oil   | m918 | Ki3        | -0.02                      | 0.368                 | 0.549                 |
| Oil   | m918 | Ky21       | -0.02                      | 0.366                 | 0.549                 |
| Oil   | m918 | M162W      | -0.06                      | 0.009                 | 0.043*                |
| Oil   | m918 | M37W       | 0.01                       | 0.604                 | 0.736                 |
| Oil   | m918 | Mo18W      | 0.04                       | 0.062                 | 0.166                 |
| Oil   | m918 | MS71       | 0.06                       | 0.010                 | 0.046*                |
| Oil   | m918 | NC350      | 0.10                       | 0.000                 | 0.001**               |
| Oil   | m918 | NC358      | 0.07                       | 0.006                 | 0.029*                |
| Oil   | m918 | Oh43       | 0.02                       | 0.318                 | 0.504                 |
| Oil   | m918 | Oh7B       | 0.00                       | 0.859                 | 0.915                 |
| Oil   | m918 | Tx303      | 0.02                       | 0.484                 | 0.650                 |
| Oil   | m918 | Tzi8       | 0.08                       | 0.000                 | 0.003*                |
| Oil   | m995 | B97        | -0.06                      | 0.003                 | 0.019*                |
| Oil   | m995 | CML103     | -0.04                      | 0.044                 | 0.132                 |
| Oil   | m995 | CML228     | -0.11                      | 0.000                 | 0.001**               |
| Oil   | m995 | CML247     | -0.03                      | 0.246                 | 0.422                 |
| Oil   | m995 | CML277     | 0.01                       | 0.496                 | 0.659                 |
| Oil   | m995 | CML322     | -0.03                      | 0.213                 | 0.385                 |
| Oil   | m995 | CML333     | -0.04                      | 0.041                 | 0.127                 |
| Oil   | m995 | CML52      | 0.01                       | 0.728                 | 0.821                 |
| Oil   | m995 | CML69      | 0.04                       | 0.111                 | 0.249                 |
| Oil   | m995 | HP301      | 0.06                       | 0.004                 | 0.022*                |
| Oil   | m995 | Ki11       | 0.03                       | 0.148                 | 0.295                 |
| Oil   | m995 | Ki3        | 0.03                       | 0.309                 | 0.490                 |
| Oil   | m995 | Ky21       | -0.06                      | 0.002                 | 0.014*                |
| Oil   | m995 | M162W      | -0.04                      | 0.118                 | 0.261                 |
| Oil   | m995 | M37W       | -0.04                      | 0.077                 | 0.192                 |
| Oil   | m995 | Mo18W      | -0.07                      | 0.001                 | 0.008*                |
| Oil   | m995 | MS71       | -0.01                      | 0.715                 | 0.811                 |
| Oil   | m995 | NC350      | -0.06                      | 0.005                 | 0.026*                |
| Oil   | m995 | NC358      | 0.03                       | 0.228                 | 0.400                 |
| Oil   | m995 | Oh43       | 0.00                       | 0.878                 | 0.921                 |

Table S7: (continued...Oil)

| Trait | QTL   | Population | Effect <sup>a</sup><br>(%) | Raw<br><i>P-value</i> | FDR<br><i>P-value</i> |
|-------|-------|------------|----------------------------|-----------------------|-----------------------|
| Oil   | m995  | Oh7B       | 0.00                       | 0.976                 | 0.986                 |
| Oil   | m995  | Tx303      | -0.09                      | 0.000                 | 0.002*                |
| Oil   | m995  | Tzi8       | -0.10                      | 0.000                 | 0.001**               |
| Oil   | m1085 | B97        | -0.01                      | 0.693                 | 0.797                 |
| Oil   | m1085 | CML103     | -0.06                      | 0.003                 | 0.020*                |
| Oil   | m1085 | CML228     | -0.03                      | 0.120                 | 0.261                 |
| Oil   | m1085 | CML247     | -0.01                      | 0.812                 | 0.887                 |
| Oil   | m1085 | CML277     | -0.07                      | 0.006                 | 0.030*                |
| Oil   | m1085 | CML322     | 0.00                       | 0.888                 | 0.929                 |
| Oil   | m1085 | CML333     | 0.00                       | 0.828                 | 0.889                 |
| Oil   | m1085 | CML52      | -0.09                      | 0.000                 | 0.001**               |
| Oil   | m1085 | CML69      | -0.06                      | 0.013                 | 0.057                 |
| Oil   | m1085 | HP301      | -0.01                      | 0.594                 | 0.734                 |
| Oil   | m1085 | Ki11       | 0.02                       | 0.483                 | 0.650                 |
| Oil   | m1085 | Ki3        | -0.06                      | 0.030                 | 0.104                 |
| Oil   | m1085 | Ky21       | -0.11                      | 0.000                 | 0.001**               |
| Oil   | m1085 | M162W      | -0.03                      | 0.202                 | 0.369                 |
| Oil   | m1085 | M37W       | 0.01                       | 0.768                 | 0.848                 |
| Oil   | m1085 | Mo18W      | -0.02                      | 0.333                 | 0.518                 |
| Oil   | m1085 | MS71       | 0.00                       | 0.862                 | 0.915                 |
| Oil   | m1085 | NC350      | -0.06                      | 0.004                 | 0.023*                |
| Oil   | m1085 | NC358      | -0.05                      | 0.031                 | 0.107                 |
| Oil   | m1085 | Oh43       | 0.01                       | 0.621                 | 0.752                 |
| Oil   | m1085 | Oh7B       | -0.02                      | 0.355                 | 0.542                 |
| Oil   | m1085 | Tx303      | -0.07                      | 0.002                 | 0.012*                |
| Oil   | m1085 | Tzi8       | -0.10                      | 0.000                 | 0.001**               |

<sup>a</sup>Percent oil kernel composition on a dry matter basis relative to B73.

\* FDR:  $P \leq 0.05$

\*\* FDR:  $P \leq 0.001$

Table S8: Pleiotropy between percent starch, protein, and oil kernel content on a dry matter basis NAM QTL.

| Chr | Joint-linkage QTL Marker [cM] |                 |                 | Correlations |          |         |
|-----|-------------------------------|-----------------|-----------------|--------------|----------|---------|
|     | Starch                        | Protein         | Oil             | S/P          | S/O      | P/O     |
| --- | Phenotypic                    |                 |                 | -0.66***     | -0.41*** | 0.32*** |
| --- | All Overlapping QTL           |                 |                 | -0.59***     | -0.27*** | 0.29*** |
| 1   | m120<br>[146]                 | m115<br>[137.6] | m118<br>[141.9] | -0.51*       | -0.25    | 0.43*   |
| 2   | ---                           | m209<br>[53.3]  | m221<br>[64.2]  | ---          | ---      | 0.46*   |
| 2   | m232<br>[74.8]                | m261<br>[94.9]  | m240<br>[79.8]  | -0.20        | 0.05     | 0.62**  |
| 3   | m353<br>[62.4]                | m353<br>[62.4]  | m330<br>[56]    | -0.62**      | -0.10    | -0.10   |
| 3   | m426<br>[145.3]               | m425<br>[145.1] | ---             | -0.69**      | ---      | ---     |
| 4   | ---                           | m484<br>[61.8]  | m474<br>[57.4]  | ---          | ---      | 0.46*   |
| 5   | m619<br>[70]                  | m615<br>[68.7]  | ---             | -0.57**      | ---      | ---     |
| 5   | m650<br>[98.8]                | m657<br>[101.9] | m638<br>[87.2]  | -0.63**      | -0.04    | 0.24    |
| 6   | m696<br>[11.3]                | m694<br>[11.1]  | m708<br>[33.4]  | -0.70**      | 0.06     | 0.01    |
| 6   | m707<br>[28.7]                | m707<br>[28.7]  | m708<br>[33.4]  | -0.61**      | -0.59**  | 0.65**  |
| 6   | ---                           | m729<br>[54]    | m739<br>[61.4]  | ---          | ---      | 0.61*   |
| 7   | m810<br>[75.3]                | m802<br>[69.8]  | ---             | -0.60**      | ---      | ---     |
| 7   | m820<br>[95.2]                | m820<br>[95.2]  | ---             | -0.52**      | ---      | ---     |
| 8   | m922<br>[88.2]                | m912<br>[76.1]  | m918<br>[82.3]  | -0.58**      | -0.35    | 0.15    |
| 9   | m968<br>[41.8]                | m963<br>[40]    | ---             | -0.68**      | ---      | ---     |
| 10  | m1060<br>[40.8]               | m1084<br>[56.1] | m1085<br>[58.4] | -0.45*       | -0.22    | 0.42*   |

\* Significant at  $P \leq 0.05$

\*\* Significant at  $P \leq 0.01$

\*\*\* Significant at  $P \leq 0.0001$



Table S9: NAM GWAS Stepwise Forward Regression associations overlap with NAM joint-linkage QTL intervals, and NAM multiple SNP model GWAS for percent starch on a dry matter basis.

| Chr | Marker ID      | AGP_v1<br>(bp) | cM     | Effect <sup>a</sup><br>(%) | P-Value  | Joint-Linkage<br>QTL Interval <sup>b</sup> | Multiple SNP<br>Model <sup>c</sup> | Candidate Gene <sup>d</sup>               |
|-----|----------------|----------------|--------|----------------------------|----------|--------------------------------------------|------------------------------------|-------------------------------------------|
| 01  | pze0109178815  | 9,178,815      | 17.71  | -0.17                      | 5.55E-11 | Yes                                        | Yes                                | Unknown                                   |
| 01  | pze0158650146  | 58,650,146     | 71.21  | -0.25                      | 6.81E-19 | Yes                                        | Yes                                |                                           |
| 01  | pze01117997538 | 117,997,538    | 89.26  | -0.23                      | 3.60E-09 | No                                         | Yes                                |                                           |
| 01  | pze01201990714 | 201,990,714    | 115.48 | -0.18                      | 2.00E-09 | No                                         | Yes                                | <i>MKLI</i> (transmembrane kinase-like 1) |
| 02  | pze0202620319  | 2,620,319      | 6.01   | -0.35                      | 3.70E-13 | Yes                                        | Yes                                | <i>ATEHDI</i> (EPS15 Homology Domain 1)   |
| 02  | pze02141337051 | 141,337,051    | 79.39  | -0.28                      | 6.99E-11 | Yes                                        | Yes                                | Unknown                                   |
| 02  | pze02192606911 | 192,606,911    | 103.71 | -0.63                      | 3.33E-08 | Yes                                        | Yes                                | Subtilisin homologue                      |
| 03  | pze0356089855  | 56,089,855     | 57.48  | -0.70                      | 9.37E-13 | Yes                                        | Yes                                |                                           |
| 03  | pze03123153166 | 123,153,166    | 60.36  | -0.19                      | 1.15E-07 | No                                         | No                                 |                                           |
| 03  | pze03140000571 | 140,000,571    | 63.78  | 0.25                       | 5.79E-15 | Yes                                        | Yes                                | Unknown                                   |
| 03  | pze03211988248 | 211,988,248    | 122.98 | -0.22                      | 7.87E-10 | Yes                                        | Yes                                |                                           |
| 03  | pze03226480885 | 226,480,885    | 150.48 | 0.30                       | 3.62E-14 | Yes                                        | Yes                                |                                           |
| 04  | pze04170737403 | 170,737,403    | 78.92  | -0.21                      | 2.96E-09 | Yes                                        | Yes                                |                                           |

Table S9: (continued... Starch)

| Chr | Marker ID      | AGP_v1<br>(bp) | cM     | Effect <sup>a</sup><br>(%) | P-Value  | Joint-Linkage<br>QTL Interval <sup>b</sup> | Multiple SNP<br>Model <sup>c</sup> | Candidate Gene <sup>d</sup>                                      |
|-----|----------------|----------------|--------|----------------------------|----------|--------------------------------------------|------------------------------------|------------------------------------------------------------------|
| 04  | pze04244714059 | 244,714,059    | 138.08 | 0.16                       | 5.22E-11 | Yes                                        | Yes                                | <i>BMV2</i> (Beta-Amylase 2)                                     |
| 05  | pze0510452325  | 10,452,325     | 33.52  | 0.23                       | 4.40E-07 | No                                         | Yes                                | <i>MKK-4</i> ( MAP kinase)                                       |
| 05  | pze0552385845  | 52,385,845     | 61.25  | 0.61                       | 1.41E-07 | No                                         | No                                 |                                                                  |
| 05  | pze05142118751 | 142,118,751    | 71.87  | -0.23                      | 9.86E-15 | Yes                                        | Yes                                |                                                                  |
| 05  | pze05186099665 | 186,099,665    | 95.67  | -0.27                      | 1.10E-19 | Yes                                        | Yes                                |                                                                  |
| 05  | pze05204759530 | 204,759,530    | 116.92 | -0.33                      | 7.23E-12 | No                                         | Yes                                | GDSL-like lipase/acylhydrolase                                   |
| 06  | pze0685049949  | 85,049,949     | 13.07  | -0.16                      | 1.35E-11 | Yes                                        | Yes                                | Unknown                                                          |
| 06  | pze06105019334 | 105,019,334    | 30.81  | -0.33                      | 3.04E-13 | No                                         | Yes                                | <i>DGATI-2</i> (type I acyl-CoA:diacylglycerol acyltransferase ) |
| 06  | pze06137691479 | 137,691,479    | 53.31  | 0.14                       | 4.27E-08 | No                                         | Yes                                |                                                                  |
| 07  | pze07125162082 | 125,162,082    | 65.63  | -0.19                      | 3.66E-09 | No                                         | Yes                                |                                                                  |
| 07  | pze07155752329 | 155,752,329    | 97.60  | 0.28                       | 1.15E-31 | Yes                                        | Yes                                |                                                                  |
| 08  | pze0822633514  | 22,633,514     | 48.80  | 0.28                       | 4.39E-10 | No                                         | No                                 |                                                                  |
| 08  | pze0844345061  | 44,345,061     | 52.07  | 0.34                       | 1.33E-14 | Yes                                        | Yes                                |                                                                  |

Table S9: (continued... Starch)

| Chr | Marker ID      | AGP_v1<br>(bp) | cM    | Effect <sup>a</sup><br>(%) | P-Value  | Joint-Linkage<br>QTL Interval <sup>b</sup> | Multiple SNP<br>Model <sup>c</sup> | Candidate Gene <sup>d</sup> |
|-----|----------------|----------------|-------|----------------------------|----------|--------------------------------------------|------------------------------------|-----------------------------|
| 08  | pze08144928072 | 144,928,072    | 74.76 | -0.44                      | 5.66E-11 | No                                         | Yes                                |                             |
| 08  | pze08163605070 | 163,605,070    | 95.70 | -0.18                      | 3.07E-08 | No                                         | No                                 |                             |
| 09  | pze0926889502  | 26,889,502     | 43.53 | -0.19                      | 6.57E-12 | Yes                                        | Yes                                | Expansin precursor          |
| 09  | pze09105200196 | 105,200,196    | 52.21 | -0.19                      | 4.32E-05 | No                                         | Yes                                |                             |
| 09  | pze09126531474 | 126,531,474    | 62.88 | -0.16                      | 5.42E-07 | Yes                                        | Yes                                |                             |
| 10  | pze1009087858  | 9,087,858      | 25.14 | 0.19                       | 1.61E-07 | No                                         | No                                 |                             |
| 10  | pze1091042082  | 91,042,082     | 41.73 | 0.16                       | 1.39E-12 | Yes                                        | Yes                                |                             |

<sup>a</sup> Percent oil kernel composition on a dry matter basis relative to B73.

<sup>b</sup> 'Yes' = associated SNP is positioned in a NAM joint-linkage QTL interval, and 'No' = associated SNP is located outside NAM joint-linkage QTL intervals.

<sup>c</sup> 'Yes' = associated stepwise forward regression SNP was selected by the multiple SNP model (RMIP  $\geq$  0.05), and 'No' = associated stepwise forward regression SNP was not selected by the multiple SNP model (RMIP  $\geq$  0.05)

<sup>d</sup> Candidate gene described if associated marker is located within the gene.

Table S10: NAM GWAS Stepwise Forward Regression associations, overlap with NAM joint-linkage QTL intervals, and NAM multiple SNP model GWAS for percent protein on a dry matter basis.

| Chr | Marker ID      | AGP_v1<br>(bp) | cM    | Effect <sup>a</sup><br>(%) | P-Value  | Joint-Linkage<br>QTL Interval <sup>b</sup> | Multiple SNP<br>Model <sup>c</sup> | Candidate Gene <sup>d</sup>                                                         |
|-----|----------------|----------------|-------|----------------------------|----------|--------------------------------------------|------------------------------------|-------------------------------------------------------------------------------------|
| 01  | pze0141569344  | 41,569,344     | 59.1  | 0.16                       | 2.70E-08 | Yes                                        | Yes                                | Unknown                                                                             |
| 01  | pze01214607570 | 214,607,570    | 125.8 | -0.14                      | 2.41E-09 | No                                         | Yes                                |                                                                                     |
| 01  | pze01233597309 | 233,597,309    | 138.6 | -0.11                      | 1.22E-07 | No                                         | No                                 |                                                                                     |
| 01  | pze01264586209 | 264,586,209    | 159.2 | 0.11                       | 1.72E-18 | Yes                                        | Yes                                |                                                                                     |
| 02  | pze0206003320  | 6,003,320      | 18.5  | 0.08                       | 2.95E-07 | No                                         | Yes                                |                                                                                     |
| 02  | pze0218286061  | 18,286,061     | 48.0  | 0.14                       | 3.03E-07 | No                                         | Yes                                | Unknown                                                                             |
| 02  | pze02184529536 | 184,529,536    | 95.0  | -0.10                      | 3.57E-12 | Yes                                        | Yes                                |                                                                                     |
| 02  | pze02234059444 | 234,059,444    | 156.6 | -0.08                      | 2.65E-09 | No                                         | Yes                                | <i>KNAT1</i> (Knotted-like from <i>Arabidopsis thaliana</i> , transcription factor) |
| 03  | pze03107736175 | 107,736,175    | 58.7  | 0.14                       | 1.17E-14 | Yes                                        | Yes                                |                                                                                     |
| 03  | pze03225917080 | 225,917,080    | 149.6 | -0.09                      | 8.26E-12 | No                                         | Yes                                |                                                                                     |
| 04  | pze04152317836 | 152,317,836    | 64.0  | 0.14                       | 3.69E-15 | Yes                                        | Yes                                |                                                                                     |
| 04  | pze04175740882 | 175,740,882    | 86.8  | 0.20                       | 8.11E-08 | Yes                                        | Yes                                | Subtilase family protein                                                            |
| 05  | pze0588027712  | 88,027,712     | 69.4  | -0.16                      | 7.57E-10 | Yes                                        | Yes                                |                                                                                     |

Table S10: (continued...Protein)

| Chr | Marker ID      | AGP_v1<br>(bp) | cM    | Effect <sup>a</sup><br>(%) | P-Value  | Joint-Linkage<br>QTL Interval <sup>b</sup> | Multiple SNP<br>Model <sup>c</sup> | Candidate Gene <sup>d</sup>    |
|-----|----------------|----------------|-------|----------------------------|----------|--------------------------------------------|------------------------------------|--------------------------------|
| 05  | pze05197933894 | 197,933,894    | 105.8 | 0.15                       | 2.03E-26 | Yes                                        | Yes                                |                                |
| 06  | pze0673924500  | 73,924,500     | 10.4  | 0.15                       | 6.56E-15 | Yes                                        | Yes                                | Phosphate translocator-related |
| 06  | pze06106474383 | 106,474,383    | 32.3  | 0.12                       | 6.19E-08 | No                                         | No                                 |                                |
| 06  | pze06137612791 | 137,612,791    | 53.3  | -0.14                      | 1.09E-17 | Yes                                        | Yes                                |                                |
| 06  | pze06164950817 | 164,950,817    | 100.7 | 0.09                       | 1.87E-11 | Yes                                        | Yes                                |                                |
| 07  | pze07128349130 | 128,349,130    | 69.8  | -0.12                      | 1.44E-09 | Yes                                        | Yes                                |                                |
| 07  | pze07149948232 | 149,948,232    | 87.8  | -0.10                      | 1.18E-12 | No                                         | Yes                                |                                |
| 08  | pze0873822546  | 73,822,546     | 54.0  | -0.12                      | 1.50E-21 | Yes                                        | Yes                                | Unknown                        |
| 08  | pze08145172472 | 145,172,472    | 75.0  | -0.16                      | 1.47E-11 | Yes                                        | Yes                                | Carbonic anhydrase             |
| 08  | pze08163510712 | 163,510,712    | 95.4  | 0.18                       | 4.69E-09 | Yes                                        | Yes                                |                                |
| 09  | pze098323233   | 8,323,233      | 11.8  | 0.11                       | 6.50E-07 | No                                         | Yes                                |                                |
| 09  | pze09102494203 | 102,494,203    | 51.1  | 0.09                       | 2.21E-11 | No                                         | Yes                                |                                |
| 09  | pze09135383651 | 135,383,651    | 72.4  | 0.10                       | 1.40E-13 | Yes                                        | Yes                                | <i>TRFL1</i> (TRF-Like 1)      |

Table S10: (continued...Protein)

| Chr | Marker ID      | AGP_v1<br>(bp) | cM   | Effect <sup>a</sup><br>(%) | P-Value  | Joint-Linkage<br>QTL Interval <sup>b</sup> | Multiple SNP<br>Model <sup>c</sup> | Candidate Gene <sup>d</sup>                         |
|-----|----------------|----------------|------|----------------------------|----------|--------------------------------------------|------------------------------------|-----------------------------------------------------|
| 09  | pze09142950644 | 142,950,644    | 89.4 | 0.19                       | 1.29E-07 | Yes                                        | Yes                                | Zinc finger (C3HC4-type RING finger) family protein |
| 10  | pze1050061312  | 50,061,312     | 36.3 | -0.14                      | 6.34E-13 | Yes                                        | Yes                                |                                                     |
| 10  | pze10131716806 | 131,716,806    | 55.2 | -0.15                      | 7.67E-35 | Yes                                        | Yes                                |                                                     |
| 10  | pze10143096411 | 143,096,411    | 80.1 | -0.11                      | 2.61E-08 | No                                         | Yes                                |                                                     |
| 10  | pze10148028746 | 148,028,746    | 99.5 | 0.14                       | 4.06E-12 | Yes                                        | Yes                                |                                                     |

<sup>a</sup> Percent oil kernel composition on a dry matter basis relative to B73.

<sup>b</sup> 'Yes' = associated SNP is positioned in a NAM joint-linkage QTL interval, and 'No' = associated SNP is located outside NAM joint-linkage QTL intervals.

<sup>c</sup> 'Yes' = associated stepwise forward regression SNP was selected by the multiple SNP model ( $RMIP \geq 0.05$ ), and 'No' = associated stepwise forward regression SNP was not selected by the multiple SNP model ( $RMIP < 0.05$ )

<sup>d</sup> Candidate gene described if associated marker is located within the gene.

Table S11: NAM GWAS Stepwise Forward Regression associations, overlap with NAM joint-linkage QTL intervals, and NAM multiple SNP model GWAS for percent oil on a dry matter basis.

| Chr | Marker ID      | AGP_v1<br>(bp) | cM    | Effect <sup>a</sup><br>(%) | P-Value  | Joint-Linkage<br>QTL Interval <sup>b</sup> | Multiple SNP<br>Model <sup>c</sup> | Candidate Gene <sup>d</sup>                                               |
|-----|----------------|----------------|-------|----------------------------|----------|--------------------------------------------|------------------------------------|---------------------------------------------------------------------------|
| 01  | pze0118568101  | 18,568,101     | 35.1  | 0.04                       | 7.67E-08 | Yes                                        | Yes                                |                                                                           |
| 01  | pze0127054049  | 27,054,049     | 44.6  | 0.07                       | 5.46E-10 | Yes                                        | Yes                                |                                                                           |
| 01  | pze0174517643  | 74,517,643     | 79.1  | -0.06                      | 2.45E-07 | No                                         | Yes                                |                                                                           |
| 01  | pze01198964527 | 198,964,527    | 112.3 | 0.06                       | 1.35E-14 | No                                         | Yes                                |                                                                           |
| 01  | pze01210953214 | 210,953,214    | 122.6 | 0.05                       | 7.82E-10 | Yes                                        | Yes                                |                                                                           |
| 01  | pze01295769034 | 295,769,034    | 199.4 | 0.05                       | 9.64E-19 | Yes                                        | Yes                                |                                                                           |
| 02  | pze0212864473  | 12,864,473     | 36.8  | 0.10                       | 1.26E-08 | No                                         | No                                 |                                                                           |
| 02  | pze0220327496  | 20,327,496     | 51.1  | -0.06                      | 1.35E-11 | No                                         | Yes                                | <i>CNX5</i> (Co-Factor for Nitrate Reductase and Xanthine Dehydrogenas 5) |
| 02  | pze0244884255  | 44,884,255     | 69.7  | -0.04                      | 6.24E-12 | Yes                                        | Yes                                | <i>ABAI</i> (ABA Deficient 1, zeaxanthin epoxidase)                       |
| 02  | pze02173076399 | 173,076,399    | 85.2  | -0.07                      | 3.09E-08 | No                                         | Yes                                | <i>SCPL18</i> (Serine carboxypeptidase-like 18)                           |
| 02  | pze02188225260 | 188,225,260    | 99.8  | 0.09                       | 4.17E-10 | No                                         | Yes                                |                                                                           |
| 02  | pze02216096302 | 216,096,302    | 129.0 | -0.06                      | 4.63E-07 | No                                         | No                                 |                                                                           |
| 03  | pze0302103927  | 2,103,927      | 4.5   | -0.05                      | 9.37E-09 | No                                         | Yes                                |                                                                           |

Table S11: (continued...Oil)

| Chr | Marker ID      | AGP_v1<br>(bp) | cM    | Effect <sup>a</sup><br>(%) | P-Value  | Joint-Linkage<br>QTL Interval <sup>b</sup> | Multiple SNP<br>Model <sup>c</sup> | Candidate Gene <sup>d</sup>                                               |
|-----|----------------|----------------|-------|----------------------------|----------|--------------------------------------------|------------------------------------|---------------------------------------------------------------------------|
| 03  | pze0358388350  | 58,388,350     | 57.7  | -0.07                      | 3.98E-13 | Yes                                        | Yes                                | Serine/threonine protein kinase                                           |
| 03  | pze03101264408 | 101,264,408    | 58.3  | 0.07                       | 1.38E-07 | Yes                                        | No                                 |                                                                           |
| 03  | pze03173206531 | 173,206,531    | 83.5  | -0.06                      | 9.48E-07 | No                                         | No                                 |                                                                           |
| 03  | pze03179938275 | 179,938,275    | 92.0  | 0.05                       | 3.52E-16 | No                                         | Yes                                |                                                                           |
| 03  | pze03211146687 | 211,146,687    | 121.9 | 0.06                       | 1.40E-11 | No                                         | Yes                                |                                                                           |
| 03  | pze03220908923 | 220,908,923    | 139.1 | -0.03                      | 3.88E-08 | No                                         | No                                 |                                                                           |
| 04  | pze0422895076  | 22,895,076     | 46.3  | 0.08                       | 1.37E-10 | No                                         | Yes                                |                                                                           |
| 04  | pze04163300645 | 163,300,645    | 73.4  | 0.07                       | 5.43E-08 | No                                         | Yes                                |                                                                           |
| 04  | pze04172891298 | 172,891,298    | 82.7  | 0.04                       | 1.39E-07 | Yes                                        | Yes                                | <i>ERF</i> (Ethylene Response Factor B-6 of ERF/AP2 transcription factor) |
| 04  | pze04209879846 | 209,879,846    | 109.4 | -0.06                      | 3.44E-11 | No                                         | Yes                                |                                                                           |
| 04  | pze04242648433 | 242,648,433    | 130.6 | -0.04                      | 3.52E-07 | No                                         | Yes                                | Sugar isomerase (SIS) domain-containing protein                           |
| 05  | pze0504091479  | 4,091,479      | 12.9  | 0.06                       | 4.80E-12 | Yes                                        | Yes                                | Histone H1.2                                                              |
| 05  | pze0511879036  | 11,879,036     | 37.3  | -0.06                      | 9.67E-16 | Yes                                        | Yes                                |                                                                           |
| 05  | pze0547696011  | 47,696,011     | 60.3  | 0.07                       | 3.00E-08 | No                                         | No                                 |                                                                           |
| 05  | pze0551583383  | 51,583,383     | 61.1  | 0.06                       | 9.74E-17 | Yes                                        | Yes                                | Iron ion binding / oxidoreductase                                         |
| 05  | pze05177086187 | 177,086,187    | 88.2  | 0.04                       | 2.71E-08 | No                                         | No                                 |                                                                           |
| 05  | pze05212800876 | 212,800,876    | 142.3 | -0.05                      | 3.24E-08 | No                                         | Yes                                |                                                                           |



Table S11: (continued...Oil)

| Chr | Marker ID      | AGP_v1<br>(bp) | cM    | Effect <sup>a</sup><br>(%) | P-Value  | Joint-Linkage<br>QTL Interval <sup>b</sup> | Multiple SNP<br>Model <sup>c</sup> | Candidate Gene <sup>d</sup>                                      |
|-----|----------------|----------------|-------|----------------------------|----------|--------------------------------------------|------------------------------------|------------------------------------------------------------------|
| 06  | pze06105019473 | 105,019,473    | 30.8  | 0.12                       | 6.32E-22 | Yes                                        | Yes                                | <i>DGATI-2</i> (type I acyl-CoA:diacylglycerol acyltransferase ) |
| 06  | pze06106914732 | 106,914,732    | 32.8  | 0.05                       | 1.76E-08 | Yes                                        | Yes                                |                                                                  |
| 06  | pze06112065791 | 112,065,791    | 39.0  | 0.12                       | 7.71E-14 | Yes                                        | Yes                                |                                                                  |
| 06  | pze06131405628 | 131,405,628    | 50.0  | -0.11                      | 8.35E-09 | No                                         | Yes                                | <i>ATGA2OX3</i> (gibberellin 2-oxidase 3)                        |
| 06  | pze06166173995 | 166,173,995    | 104.9 | 0.10                       | 1.46E-09 | No                                         | Yes                                | Transcription factor                                             |
| 07  | pze0798745124  | 98,745,124     | 50.8  | 0.04                       | 5.78E-10 | Yes                                        | Yes                                |                                                                  |
| 08  | pze08140964810 | 140,964,810    | 72.1  | 0.07                       | 2.32E-07 | No                                         | No                                 |                                                                  |
| 08  | pze08155478230 | 155,478,230    | 82.3  | 0.08                       | 2.47E-23 | Yes                                        | Yes                                |                                                                  |
| 09  | pze0921983416  | 21,983,416     | 38.8  | 0.13                       | 2.45E-08 | No                                         | Yes                                |                                                                  |
| 09  | pze0923229673  | 23,229,673     | 40.0  | -0.07                      | 1.10E-06 | No                                         | No                                 |                                                                  |
| 09  | pze09117897621 | 117,897,621    | 57.7  | -0.07                      | 2.11E-11 | Yes                                        | Yes                                | <i>SUS4</i> (Sucrose Synthase)                                   |
| 09  | pze09141771810 | 141,771,810    | 86.9  | -0.06                      | 4.09E-08 | No                                         | Yes                                |                                                                  |
| 10  | pze10134625388 | 134,625,388    | 59.4  | -0.05                      | 5.12E-15 | Yes                                        | Yes                                |                                                                  |

<sup>a</sup> Percent oil kernel composition on a dry matter basis relative to B73.

<sup>b</sup> 'Yes' = associated SNP is positioned in a NAM joint-linkage QTL interval, and 'No' = associated SNP is located outside NAM joint-linkage QTL intervals.

<sup>c</sup> 'Yes' = associated stepwise forward regression SNP was selected by the multiple SNP model (RMIP  $\geq 0.05$ ), and 'No' = associated stepwise forward regression SNP was not selected by the multiple SNP model (RMIP  $\geq 0.05$ )

<sup>d</sup> Candidate gene described if associated marker is located within the gene.

Table S12: NAM multiple SNP model GWAS associations (RMIP  $\geq$  0.05) and overlap with NAM joint-linkage QTL intervals for percent starch content on a dry matter basis.

| Chr | Marker ID      | AGP_v1<br>(bp) | cM    | Effect <sup>a</sup><br>(%) | P-Value  | RMIP | Joint-Linkage<br>QTL Interval <sup>b</sup> | Candidate Gene <sup>c</sup>                     |
|-----|----------------|----------------|-------|----------------------------|----------|------|--------------------------------------------|-------------------------------------------------|
| 01  | pze0109178815  | 9,178,815      | 17.7  | -0.18                      | 3.62E-09 | 0.66 | Yes                                        | Unknown                                         |
| 01  | pze0158650146  | 58,650,146     | 71.2  | -0.27                      | 3.74E-17 | 0.19 | Yes                                        |                                                 |
| 01  | pze0159830429  | 59,830,429     | 71.8  | -0.29                      | 7.14E-23 | 0.06 | Yes                                        | Zinc finger (B-box type) family protein         |
| 01  | pze0168727976  | 68,727,976     | 76.2  | -0.29                      | 2.20E-21 | 0.06 | No                                         |                                                 |
| 01  | pze0169444334  | 69,444,334     | 76.5  | -0.26                      | 2.33E-18 | 0.13 | No                                         |                                                 |
| 01  | pze0171186169  | 71,186,169     | 77.4  | -0.36                      | 1.09E-16 | 0.28 | No                                         | <i>LBD40</i> (Lob Domain-Containing Protein 40) |
| 01  | pze0171187215  | 71,187,215     | 77.4  | -0.23                      | 1.33E-14 | 0.12 | No                                         | <i>LBD40</i> (Lob Domain-Containing Protein 40) |
| 01  | pze01116549619 | 116,549,619    | 89.2  | -0.29                      | 1.06E-08 | 0.05 | No                                         |                                                 |
| 01  | pze01117997538 | 117,997,538    | 89.3  | -0.26                      | 2.51E-10 | 0.12 | No                                         |                                                 |
| 01  | pze01191979771 | 191,979,771    | 105.6 | -0.32                      | 1.57E-08 | 0.08 | No                                         | <i>RABA5E</i> (Rab GTPase Homolog A5E)          |
| 01  | pze01199483749 | 199,483,749    | 112.9 | -0.32                      | 1.01E-07 | 0.06 | No                                         | <i>AMY1</i> (Alpha-Amylase-Like)                |
| 01  | pze01200084192 | 200,084,192    | 113.6 | -0.22                      | 4.63E-11 | 0.05 | No                                         | Patatin                                         |
| 01  | pze01201990714 | 201,990,714    | 115.5 | -0.21                      | 7.18E-11 | 0.06 | No                                         | <i>MKLI</i> (transmembrane kinase-like 1)       |
| 01  | pze01202136346 | 202,136,346    | 115.6 | -0.25                      | 3.04E-13 | 0.06 | No                                         |                                                 |
| 01  | pze01240044380 | 240,044,380    | 141.6 | -0.36                      | 1.01E-08 | 0.10 | Yes                                        |                                                 |
| 01  | pze01240049862 | 240,049,862    | 141.6 | -0.27                      | 1.61E-07 | 0.05 | Yes                                        |                                                 |
| 01  | pze01248398421 | 248,398,421    | 145.9 | -0.24                      | 3.54E-08 | 0.09 | Yes                                        |                                                 |

Table S12: (continued... Starch)

| Chr | Marker ID      | AGP_v1<br>(bp) | cM    | Effect <sup>a</sup><br>(%) | P-Value  | RMIP | Joint-Linkage<br>QTL Interval <sup>b</sup> | Candidate Gene <sup>c</sup>                                    |
|-----|----------------|----------------|-------|----------------------------|----------|------|--------------------------------------------|----------------------------------------------------------------|
| 02  | pze0201639448  | 1,639,448      | 1.9   | -0.34                      | 6.96E-08 | 0.08 | No                                         |                                                                |
| 02  | pze0202619241  | 2,619,241      | 6.0   | -0.57                      | 7.88E-13 | 0.10 | Yes                                        | <i>ATEHDI</i> (EPS15 Homology Domain 1)                        |
| 02  | pze0202620319  | 2,620,319      | 6.0   | -0.37                      | 1.56E-17 | 0.29 | Yes                                        | <i>ATEHDI</i> (EPS15 Homology Domain 1)                        |
| 02  | pze0203736479  | 3,736,479      | 10.4  | -0.57                      | 5.24E-17 | 0.07 | Yes                                        | <i>NRT1.6</i> (Nitrate Transporter 1.6)                        |
| 02  | pze0203736494  | 3,736,494      | 10.4  | -0.55                      | 7.08E-16 | 0.07 | Yes                                        | <i>NRT1.6</i> (Nitrate Transporter 1.6)                        |
| 02  | pze0203851757  | 3,851,757      | 10.7  | -0.20                      | 1.88E-12 | 0.09 | Yes                                        |                                                                |
| 02  | pze0205342144  | 5,342,144      | 15.9  | -0.32                      | 9.86E-14 | 0.21 | No                                         |                                                                |
| 02  | pze0205687767  | 5,687,767      | 17.2  | -0.32                      | 6.76E-12 | 0.09 | No                                         | <i>ATEMEIA</i> (Arabidopsis Essential Meiotic Endonuclease 1A) |
| 02  | pze0220521754  | 20,521,754     | 51.3  | -0.29                      | 2.37E-07 | 0.05 | No                                         |                                                                |
| 02  | pze0223242982  | 23,242,982     | 55.3  | -0.26                      | 1.10E-09 | 0.12 | No                                         |                                                                |
| 02  | pze02141337051 | 141,337,051    | 79.4  | -0.30                      | 1.51E-09 | 0.23 | Yes                                        | Unknown                                                        |
| 02  | pze02190583445 | 190,583,445    | 101.9 | -0.42                      | 9.31E-10 | 0.18 | No                                         |                                                                |
| 02  | pze02192124279 | 192,124,279    | 103.3 | -0.39                      | 2.44E-08 | 0.09 | Yes                                        | <i>CYP78A9</i> (Cytochrome P450 78A9)                          |
| 02  | pze02192606911 | 192,606,911    | 103.7 | -0.75                      | 2.33E-13 | 0.16 | Yes                                        | Subtilisin homologue                                           |
| 02  | pze02193309684 | 193,309,684    | 104.5 | -0.33                      | 3.98E-12 | 0.12 | Yes                                        |                                                                |
| 02  | pze02214677037 | 214,677,037    | 127.3 | -0.67                      | 7.85E-10 | 0.05 | No                                         | Unknown                                                        |
| 03  | pze0343868037  | 43,868,037     | 56.0  | -0.73                      | 1.21E-10 | 0.23 | No                                         | Pyruvate kinase                                                |

Table S12: (continued... Starch)

| Chr | Marker ID      | AGP_v1<br>(bp) | cM    | Effect <sup>a</sup><br>(%) | P-Value  | RMIP | Joint-Linkage<br>QTL Interval <sup>b</sup> | Candidate Gene <sup>c</sup>          |
|-----|----------------|----------------|-------|----------------------------|----------|------|--------------------------------------------|--------------------------------------|
| 03  | pze0356089855  | 56,089,855     | 57.5  | -0.84                      | 1.65E-11 | 0.27 | No                                         |                                      |
| 03  | pze0357223756  | 57,223,756     | 57.6  | -0.72                      | 8.17E-09 | 0.05 | No                                         |                                      |
| 03  | pze0357884496  | 57,884,496     | 57.7  | -0.73                      | 1.16E-08 | 0.05 | No                                         |                                      |
| 03  | pze0360227357  | 60,227,357     | 57.8  | -0.40                      | 4.64E-10 | 0.08 | No                                         |                                      |
| 03  | pze03140000024 | 140,000,024    | 63.8  | 0.23                       | 7.00E-08 | 0.16 | Yes                                        | Unknown                              |
| 03  | pze03140000571 | 140,000,571    | 63.8  | 0.20                       | 1.20E-07 | 0.12 | Yes                                        | Unknown                              |
| 03  | pze03140397085 | 140,397,085    | 63.8  | 0.32                       | 3.59E-10 | 0.16 | Yes                                        |                                      |
| 03  | pze03151971302 | 151,971,302    | 67.7  | 0.23                       | 5.41E-10 | 0.06 | No                                         |                                      |
| 03  | pze03207655069 | 207,655,069    | 117.3 | -0.25                      | 1.96E-09 | 0.05 | Yes                                        |                                      |
| 03  | pze03208168922 | 208,168,922    | 118.4 | -0.71                      | 2.53E-12 | 0.09 | Yes                                        |                                      |
| 03  | pze03208402374 | 208,402,374    | 118.7 | -0.19                      | 7.73E-08 | 0.07 | Yes                                        |                                      |
| 03  | pze03210621010 | 210,621,010    | 121.3 | -0.17                      | 2.10E-10 | 0.05 | Yes                                        | <i>GBF3</i> (G-Box Binding Factor 3) |
| 03  | pze03211142389 | 211,142,389    | 121.9 | -0.32                      | 1.56E-14 | 0.05 | Yes                                        |                                      |
| 03  | pze03211151474 | 211,151,474    | 121.9 | -0.26                      | 2.20E-08 | 0.13 | Yes                                        |                                      |
| 03  | pze03211988248 | 211,988,248    | 123.0 | -0.26                      | 6.14E-12 | 0.08 | Yes                                        |                                      |
| 03  | pze03225230331 | 225,230,331    | 148.5 | 0.19                       | 3.42E-09 | 0.06 | Yes                                        | Unknown                              |
| 03  | pze03225299207 | 225,299,207    | 148.6 | 0.30                       | 5.67E-11 | 0.25 | Yes                                        |                                      |

Table S12: (continued... Starch)

| Chr | Marker ID      | AGP_v1<br>(bp) | cM    | Effect <sup>a</sup><br>(%) | P-Value  | RMIP | Joint-Linkage<br>QTL Interval <sup>b</sup> | Candidate Gene <sup>c</sup>                            |
|-----|----------------|----------------|-------|----------------------------|----------|------|--------------------------------------------|--------------------------------------------------------|
| 03  | pze03226480885 | 226,480,885    | 150.5 | 0.30                       | 1.44E-10 | 0.36 | Yes                                        |                                                        |
| 04  | pze04170736886 | 170,736,886    | 78.9  | -0.21                      | 8.94E-09 | 0.05 | No                                         |                                                        |
| 04  | pze04170737403 | 170,737,403    | 78.9  | -0.23                      | 1.26E-07 | 0.38 | No                                         |                                                        |
| 04  | pze04243222819 | 243,222,819    | 132.8 | 0.20                       | 5.56E-08 | 0.19 | No                                         | <i>RPN1A</i> (26S Proteasome Regulatory Subunit S2 1A) |
| 04  | pze04244042011 | 244,042,011    | 136.3 | 0.19                       | 9.45E-10 | 0.07 | Yes                                        | <i>CDC2</i> (Cell Division Control 2)                  |
| 04  | pze04244714059 | 244,714,059    | 138.1 | 0.17                       | 1.76E-09 | 0.20 | No                                         | <i>BMV2</i> (Beta-Amylase 2)                           |
| 04  | pze04244768564 | 244,768,564    | 138.4 | 0.15                       | 7.78E-09 | 0.08 | No                                         |                                                        |
| 04  | pze04245058429 | 245,058,429    | 140.1 | 0.25                       | 3.10E-08 | 0.09 | No                                         | <i>ATMPK17</i> (MAP kinase)                            |
| 04  | pze04246797805 | 246,797,805    | 150.3 | 0.16                       | 3.53E-08 | 0.24 | No                                         |                                                        |
| 05  | pze0510452325  | 10,452,325     | 33.5  | 0.29                       | 2.86E-08 | 0.06 | No                                         | <i>MKK-4</i> ( MAP kinase)                             |
| 05  | pze0549013626  | 49,013,626     | 60.6  | 0.66                       | 4.98E-09 | 0.10 | No                                         |                                                        |
| 05  | pze0556090439  | 56,090,439     | 62.0  | 0.46                       | 6.11E-10 | 0.05 | No                                         |                                                        |
| 05  | pze05133562850 | 133,562,850    | 71.1  | -0.23                      | 7.70E-10 | 0.07 | Yes                                        |                                                        |
| 05  | pze05135149153 | 135,149,153    | 71.2  | 0.39                       | 1.01E-10 | 0.11 | Yes                                        | Lectin protein kinase                                  |
| 05  | pze05142118751 | 142,118,751    | 71.9  | -0.26                      | 3.49E-12 | 0.49 | Yes                                        |                                                        |
| 05  | pze05142203995 | 142,203,995    | 71.9  | -0.31                      | 3.68E-10 | 0.13 | Yes                                        |                                                        |
| 05  | pze05186099279 | 186,099,279    | 95.7  | -0.29                      | 2.89E-23 | 0.16 | Yes                                        |                                                        |

Table S12: (continued... Starch)

| Chr | Marker ID      | AGP_v1<br>(bp) | cM    | Effect <sup>a</sup><br>(%) | P-Value  | RMIP | Joint-Linkage<br>QTL Interval <sup>b</sup> | Candidate Gene <sup>c</sup>                                        |
|-----|----------------|----------------|-------|----------------------------|----------|------|--------------------------------------------|--------------------------------------------------------------------|
| 05  | pze05186099665 | 186,099,665    | 95.7  | -0.28                      | 2.66E-27 | 0.53 | Yes                                        |                                                                    |
| 05  | pze05186318478 | 186,318,478    | 95.9  | -0.37                      | 3.60E-24 | 0.05 | Yes                                        |                                                                    |
| 05  | pze05186323199 | 186,323,199    | 95.9  | -0.22                      | 4.21E-28 | 0.05 | Yes                                        |                                                                    |
| 05  | pze05204759425 | 204,759,425    | 116.9 | -0.35                      | 2.35E-11 | 0.10 | No                                         | GDSL-like lipase/acylhydrolase                                     |
| 05  | pze05204759530 | 204,759,530    | 116.9 | -0.35                      | 8.20E-10 | 0.29 | No                                         | GDSL-like lipase/acylhydrolase                                     |
| 05  | pze05204955808 | 204,955,808    | 117.6 | -0.33                      | 1.23E-09 | 0.06 | No                                         | Unknown                                                            |
| 05  | pze05205834648 | 205,834,648    | 120.4 | -0.41                      | 3.46E-08 | 0.26 | No                                         | Unknown                                                            |
| 06  | pze0679020378  | 79,020,378     | 11.1  | -0.19                      | 4.44E-16 | 0.05 | Yes                                        |                                                                    |
| 06  | pze0683224185  | 83,224,185     | 12.2  | -0.38                      | 7.91E-11 | 0.07 | Yes                                        |                                                                    |
| 06  | pze0683624290  | 83,624,290     | 12.4  | -0.19                      | 2.26E-11 | 0.13 | Yes                                        | <i>Apetala 3</i> (Transcription Factor)                            |
| 06  | pze0685049949  | 85,049,949     | 13.1  | -0.19                      | 1.15E-19 | 0.23 | Yes                                        | Unknown                                                            |
| 06  | pze0687588096  | 87,588,096     | 15.1  | -0.20                      | 3.20E-16 | 0.10 | Yes                                        |                                                                    |
| 06  | pze0687590851  | 87,590,851     | 15.1  | -0.19                      | 6.31E-18 | 0.05 | Yes                                        |                                                                    |
| 06  | pze06103124221 | 103,124,221    | 28.9  | -0.76                      | 3.59E-13 | 0.15 | Yes                                        |                                                                    |
| 06  | pze06104825402 | 104,825,402    | 30.6  | -0.37                      | 1.62E-08 | 0.10 | No                                         | Leucine-rich repeat family protein / protein kinase family protein |
| 06  | pze06105019334 | 105,019,334    | 30.8  | -0.38                      | 3.92E-17 | 0.51 | No                                         | <i>DGATI-2</i> (type I acyl-CoA:diacylglycerol acyltransferase )   |
| 06  | pze06105019473 | 105,019,473    | 30.8  | -0.31                      | 2.00E-09 | 0.11 | No                                         | <i>DGATI-2</i> (type I acyl-CoA:diacylglycerol acyltransferase )   |

Table S12: (continued... Starch)

| Chr | Marker ID      | AGP_v1<br>(bp) | cM    | Effect <sup>a</sup><br>(%) | P-Value  | RMIP | Joint-Linkage<br>QTL Interval <sup>b</sup> | Candidate Gene <sup>c</sup> |
|-----|----------------|----------------|-------|----------------------------|----------|------|--------------------------------------------|-----------------------------|
| 06  | pze06137558184 | 137,558,184    | 53.2  | 0.19                       | 1.24E-07 | 0.06 | No                                         |                             |
| 06  | pze06137691479 | 137,691,479    | 53.3  | 0.15                       | 1.06E-08 | 0.12 | No                                         |                             |
| 06  | pze06137691806 | 137,691,806    | 53.3  | 0.16                       | 3.62E-09 | 0.07 | No                                         |                             |
| 07  | pze0700041894  | 41,894         | -2.6  | 0.62                       | 4.42E-10 | 0.17 | No                                         |                             |
| 07  | pze07125162082 | 125,162,082    | 65.6  | -0.21                      | 2.50E-11 | 0.16 | No                                         |                             |
| 07  | pze07125723935 | 125,723,935    | 66.4  | -0.23                      | 4.17E-09 | 0.09 | No                                         |                             |
| 07  | pze07131916751 | 131,916,751    | 71.6  | -0.19                      | 2.40E-09 | 0.09 | No                                         |                             |
| 07  | pze07135133066 | 135,133,066    | 73.5  | -0.17                      | 2.38E-07 | 0.05 | Yes                                        | Unknown                     |
| 07  | pze07155187710 | 155,187,710    | 96.4  | 0.31                       | 2.06E-20 | 0.19 | Yes                                        |                             |
| 07  | pze07155752329 | 155,752,329    | 97.6  | 0.28                       | 4.95E-23 | 0.39 | Yes                                        |                             |
| 07  | pze07156689774 | 156,689,774    | 99.5  | 0.27                       | 1.50E-20 | 0.06 | Yes                                        |                             |
| 07  | pze07157016301 | 157,016,301    | 100.2 | 0.26                       | 2.57E-21 | 0.08 | Yes                                        |                             |
| 08  | pze0814982196  | 14,982,196     | 37.4  | 0.16                       | 2.55E-11 | 0.05 | No                                         | Hydrolase                   |
| 08  | pze0822538190  | 22,538,190     | 48.7  | 0.82                       | 1.63E-12 | 0.05 | Yes                                        |                             |
| 08  | pze0822624701  | 22,624,701     | 48.8  | 0.28                       | 1.33E-10 | 0.08 | Yes                                        | Unknown                     |
| 08  | pze0822625418  | 22,625,418     | 48.8  | 0.25                       | 2.92E-16 | 0.07 | Yes                                        |                             |
| 08  | pze0823124377  | 23,124,377     | 49.3  | 0.87                       | 5.54E-10 | 0.08 | Yes                                        |                             |

Table S12: (continued...Starch)

| Chr | Marker ID      | AGP_v1<br>(bp) | cM   | Effect <sup>a</sup><br>(%) | P-Value  | RMIP | Joint-Linkage<br>QTL Interval <sup>b</sup> | Candidate Gene <sup>c</sup>                         |
|-----|----------------|----------------|------|----------------------------|----------|------|--------------------------------------------|-----------------------------------------------------|
| 08  | pze0823558987  | 23,558,987     | 49.7 | 0.75                       | 2.43E-16 | 0.08 | Yes                                        |                                                     |
| 08  | pze0844345061  | 44,345,061     | 52.1 | 0.34                       | 3.94E-14 | 0.25 | Yes                                        |                                                     |
| 08  | pze0844895265  | 44,895,265     | 52.1 | 0.24                       | 4.36E-12 | 0.11 | Yes                                        |                                                     |
| 08  | pze0868350516  | 68,350,516     | 53.2 | 0.21                       | 1.95E-13 | 0.05 | Yes                                        |                                                     |
| 08  | pze08142382170 | 142,382,170    | 73.0 | -0.56                      | 1.15E-07 | 0.09 | No                                         |                                                     |
| 08  | pze08144928072 | 144,928,072    | 74.8 | -0.53                      | 7.90E-11 | 0.44 | No                                         |                                                     |
| 08  | pze08149060169 | 149,060,169    | 78.3 | -0.37                      | 1.12E-12 | 0.22 | No                                         |                                                     |
| 08  | pze08163606566 | 163,606,566    | 95.7 | -0.22                      | 4.25E-13 | 0.06 | Yes                                        |                                                     |
| 09  | pze0925024800  | 25,024,800     | 42.4 | -0.21                      | 4.81E-10 | 0.05 | Yes                                        |                                                     |
| 09  | pze0925474814  | 25,474,814     | 42.7 | -0.23                      | 7.95E-10 | 0.09 | Yes                                        | Folic acid binding / transferase                    |
| 09  | pze0925696839  | 25,696,839     | 42.8 | -0.22                      | 1.07E-09 | 0.06 | Yes                                        |                                                     |
| 09  | pze0926763799  | 26,763,799     | 43.5 | -0.24                      | 1.88E-39 | 0.05 | Yes                                        | Haloacid dehalogenase-like hydrolase family protein |
| 09  | pze0926772667  | 26,772,667     | 43.5 | -0.19                      | 2.80E-10 | 0.14 | Yes                                        | Nodulin MtN21 family protein                        |
| 09  | pze0926889502  | 26,889,502     | 43.5 | -0.23                      | 3.17E-09 | 0.16 | Yes                                        | Expansin precursor                                  |
| 09  | pze09103060309 | 103,060,309    | 51.3 | -0.22                      | 2.48E-39 | 0.09 | No                                         |                                                     |
| 09  | pze09105200196 | 105,200,196    | 52.2 | -0.22                      | 4.51E-39 | 0.52 | No                                         |                                                     |
| 09  | pze09126531474 | 126,531,474    | 62.9 | -0.21                      | 4.01E-11 | 0.10 | Yes                                        |                                                     |



Table S12: (continued...Starch)

| Chr | Marker ID      | AGP_v1<br>(bp) | cM   | Effect <sup>a</sup><br>(%) | P-Value  | RMIP | Joint-Linkage<br>QTL Interval <sup>b</sup> | Candidate Gene <sup>c</sup>                                           |
|-----|----------------|----------------|------|----------------------------|----------|------|--------------------------------------------|-----------------------------------------------------------------------|
| 09  | pze09126623782 | 126,623,782    | 62.9 | -0.19                      | 1.07E-11 | 0.10 | Yes                                        | Catalytic/ metal ion binding / metalloendopeptidase/ zinc ion binding |
| 09  | pze09126792692 | 126,792,692    | 62.9 | -0.18                      | 3.90E-12 | 0.05 | Yes                                        |                                                                       |
| 10  | pze1001442529  | 1,442,529      | -1.5 | 0.22                       | 2.71E-07 | 0.07 | No                                         | <i>ACAI1</i> (autoinhibited Ca <sup>2+</sup> -ATPase 11)              |
| 10  | pze1010103670  | 10,103,670     | 27.7 | 0.36                       | 1.14E-08 | 0.14 | No                                         | Disease resistance response protein                                   |
| 10  | pze1083322810  | 83,322,810     | 39.9 | 0.23                       | 8.31E-19 | 0.32 | Yes                                        |                                                                       |
| 10  | pze1083752598  | 83,752,598     | 40.0 | 0.19                       | 1.42E-17 | 0.10 | Yes                                        |                                                                       |
| 10  | pze1086726985  | 86,726,985     | 40.7 | 0.20                       | 1.77E-20 | 0.09 | Yes                                        |                                                                       |
| 10  | pze1091042082  | 91,042,082     | 41.7 | 0.19                       | 5.11E-18 | 0.26 | Yes                                        |                                                                       |

<sup>a</sup> Percent oil kernel composition on a dry matter basis relative to B73.

<sup>b</sup> 'Yes' = associated SNP is positioned in a NAM joint-linkage QTL interval, and 'No' = associated SNP is located outside a NAM joint-linkage QTL intervals.

<sup>c</sup> Candidate gene described if associated marker is located within the gene.

Table S13: NAM multiple SNP model GWAS associations (RMIP  $\geq 0.05$ ) and overlap with NAM joint-linkage QTL intervals for percent protein on a dry matter basis.

| Chr | Marker ID      | AGP_v1<br>(bp) | cM    | Effect <sup>a</sup><br>(%) | P-Value  | RMIP | Joint-Linkage<br>QTL Interval <sup>b</sup> | Candidate Gene <sup>c</sup>                                                      |
|-----|----------------|----------------|-------|----------------------------|----------|------|--------------------------------------------|----------------------------------------------------------------------------------|
| 01  | pze0141569344  | 41,569,344     | 59.1  | 0.18                       | 5.45E-08 | 0.23 | Yes                                        | Unknown                                                                          |
| 01  | pze01174097456 | 174,097,456    | 94.4  | -0.11                      | 8.17E-08 | 0.06 | No                                         | Putative Na <sup>+</sup> /H <sup>+</sup> antiporter family                       |
| 01  | pze01191729382 | 191,729,382    | 105.4 | -0.15                      | 5.98E-10 | 0.14 | No                                         | <i>FRAGILE FIBER3</i> (inositol or phosphatidylinositol phosphatase activity)    |
| 01  | pze01191729419 | 191,729,419    | 105.4 | -0.17                      | 2.07E-10 | 0.06 | No                                         | <i>FRAGILE FIBER3</i> (inositol or phosphatidylinositol phosphatase activity)    |
| 01  | pze01214607570 | 214,607,570    | 125.8 | -0.17                      | 7.49E-11 | 0.30 | No                                         |                                                                                  |
| 01  | pze01214607581 | 214,607,581    | 125.8 | -0.17                      | 1.76E-10 | 0.10 | No                                         |                                                                                  |
| 01  | pze01224419429 | 224,419,429    | 132.8 | -0.16                      | 1.17E-12 | 0.05 | Yes                                        | <i>YABBY3</i> (protein binding / transcription factor)                           |
| 01  | pze01233488715 | 233,488,715    | 138.6 | -0.16                      | 1.20E-08 | 0.07 | Yes                                        |                                                                                  |
| 01  | pze01233488765 | 233,488,765    | 138.6 | -0.17                      | 4.51E-11 | 0.05 | Yes                                        |                                                                                  |
| 01  | pze01261647632 | 261,647,632    | 156.9 | 0.10                       | 1.39E-09 | 0.13 | Yes                                        | Glycosyltransferase family 14 protein / core-2/I-branching enzyme family protein |
| 01  | pze01261647745 | 261,647,745    | 156.9 | 0.15                       | 6.13E-11 | 0.36 | Yes                                        | Glycosyltransferase family 14 protein / core-2/I-branching enzyme family protein |
| 01  | pze01263215117 | 263,215,117    | 158.1 | 0.12                       | 7.28E-13 | 0.05 | Yes                                        |                                                                                  |
| 01  | pze01264586209 | 264,586,209    | 159.2 | 0.11                       | 8.98E-12 | 0.21 | Yes                                        |                                                                                  |
| 02  | pze0205903537  | 5,903,537      | 18.2  | 0.10                       | 1.16E-07 | 0.09 | No                                         |                                                                                  |
| 02  | pze0206003320  | 6,003,320      | 18.5  | 0.09                       | 8.92E-08 | 0.07 | No                                         |                                                                                  |
| 02  | pze0218286061  | 18,286,061     | 48.0  | 0.18                       | 1.64E-10 | 0.29 | No                                         | Unknown                                                                          |
| 02  | pze02173762551 | 173,762,551    | 85.5  | -0.17                      | 3.37E-08 | 0.07 | Yes                                        | Unknown                                                                          |

Table S13: (continued...Protein)

| Chr | Marker ID      | AGP_v1<br>(bp) | cM    | Effect <sup>a</sup><br>(%) | P-Value  | RMIP | Joint-Linkage<br>QTL Interval <sup>b</sup> | Candidate Gene <sup>c</sup>                                                         |
|-----|----------------|----------------|-------|----------------------------|----------|------|--------------------------------------------|-------------------------------------------------------------------------------------|
| 02  | pze02184529536 | 184,529,536    | 95.0  | -0.11                      | 1.01E-12 | 0.40 | Yes                                        |                                                                                     |
| 02  | pze02192531858 | 192,531,858    | 103.6 | -0.13                      | 3.92E-10 | 0.06 | No                                         |                                                                                     |
| 02  | pze02195678917 | 195,678,917    | 106.1 | -0.13                      | 3.86E-11 | 0.15 | No                                         |                                                                                     |
| 02  | pze02195938470 | 195,938,470    | 106.3 | -0.13                      | 3.89E-08 | 0.09 | No                                         | PAZ and PIWI-domain containing protein                                              |
| 02  | pze02229979130 | 229,979,130    | 148.3 | -0.17                      | 4.80E-08 | 0.10 | No                                         |                                                                                     |
| 02  | pze02230780427 | 230,780,427    | 150.5 | -0.08                      | 1.32E-07 | 0.11 | No                                         |                                                                                     |
| 02  | pze02234059444 | 234,059,444    | 156.6 | -0.09                      | 7.43E-10 | 0.11 | No                                         | <i>KNAT1</i> (Knotted-like from <i>Arabidopsis thaliana</i> , transcription factor) |
| 02  | pze02234059448 | 234,059,448    | 156.6 | -0.09                      | 4.27E-08 | 0.07 | No                                         | <i>KNAT1</i> (Knotted-like from <i>Arabidopsis thaliana</i> , transcription factor) |
| 02  | pze02234064898 | 234,064,898    | 156.6 | -0.10                      | 7.04E-09 | 0.05 | No                                         |                                                                                     |
| 03  | pze0321965052  | 21,965,052     | 50.8  | -0.15                      | 1.70E-07 | 0.06 | No                                         |                                                                                     |
| 03  | pze03107736175 | 107,736,175    | 58.7  | 0.14                       | 2.82E-14 | 0.88 | Yes                                        |                                                                                     |
| 03  | pze03223101410 | 223,101,410    | 144.2 | -0.09                      | 8.90E-11 | 0.17 | Yes                                        |                                                                                     |
| 03  | pze03225299207 | 225,299,207    | 148.6 | -0.15                      | 6.87E-09 | 0.23 | No                                         |                                                                                     |
| 03  | pze03225917080 | 225,917,080    | 149.6 | -0.10                      | 4.23E-08 | 0.12 | No                                         |                                                                                     |
| 03  | pze03227465051 | 227,465,051    | 152.1 | -0.25                      | 7.81E-08 | 0.05 | No                                         | Unknown                                                                             |
| 03  | pze03227520838 | 227,520,838    | 152.1 | -0.12                      | 2.28E-10 | 0.07 | No                                         | Unknown                                                                             |
| 03  | pze03227520964 | 227,520,964    | 152.1 | -0.12                      | 3.16E-11 | 0.16 | No                                         |                                                                                     |
| 04  | pze0405875549  | 5,875,549      | 20.0  | 0.13                       | 4.44E-08 | 0.05 | No                                         | Cytochrome P450                                                                     |

Table S13: (continued...Protein)

| Chr | Marker ID      | AGP_v1<br>(bp) | cM    | Effect <sup>a</sup><br>(%) | P-Value  | RMIP | Joint-Linkage<br>QTL Interval <sup>b</sup> | Candidate Gene <sup>c</sup>                        |
|-----|----------------|----------------|-------|----------------------------|----------|------|--------------------------------------------|----------------------------------------------------|
| 04  | pze04139123563 | 139,123,563    | 59.8  | 0.11                       | 1.69E-14 | 0.21 | Yes                                        | ATP binding / ATP-dependent helicase/ DNA helicase |
| 04  | pze04146879810 | 146,879,810    | 61.7  | 0.11                       | 2.18E-17 | 0.13 | Yes                                        |                                                    |
| 04  | pze04152317836 | 152,317,836    | 64.0  | 0.16                       | 4.05E-18 | 0.38 | Yes                                        |                                                    |
| 04  | pze04155357655 | 155,357,655    | 66.3  | 0.11                       | 2.72E-13 | 0.06 | Yes                                        |                                                    |
| 04  | pze04175740882 | 175,740,882    | 86.8  | 0.23                       | 3.89E-08 | 0.05 | Yes                                        | Subtilase family protein                           |
| 04  | pze04176743530 | 176,743,530    | 88.0  | 0.19                       | 3.83E-09 | 0.07 | Yes                                        | Nitrate reductase                                  |
| 05  | pze0569077652  | 69,077,652     | 65.3  | -0.14                      | 2.69E-08 | 0.16 | No                                         |                                                    |
| 05  | pze0588027712  | 88,027,712     | 69.4  | -0.17                      | 1.37E-09 | 0.39 | Yes                                        |                                                    |
| 05  | pze05191372077 | 191,372,077    | 100.7 | 0.16                       | 1.33E-23 | 0.07 | Yes                                        |                                                    |
| 05  | pze05194861680 | 194,861,680    | 103.3 | 0.13                       | 5.39E-20 | 0.05 | Yes                                        |                                                    |
| 05  | pze05197933894 | 197,933,894    | 105.8 | 0.14                       | 2.30E-21 | 0.70 | Yes                                        |                                                    |
| 06  | pze0672858614  | 72,858,614     | 10.3  | 0.12                       | 3.00E-14 | 0.10 | Yes                                        | Transferase family protein                         |
| 06  | pze0673924500  | 73,924,500     | 10.4  | 0.16                       | 3.14E-16 | 0.35 | Yes                                        | Phosphate translocator-related                     |
| 06  | pze0673925144  | 73,925,144     | 10.4  | 0.15                       | 1.54E-13 | 0.12 | Yes                                        | Phosphate translocator-related                     |
| 06  | pze0685180180  | 85,180,180     | 13.1  | 0.13                       | 1.79E-18 | 0.18 | Yes                                        | <i>LEUCINE-RICH REPEAT/EXTENSIN 2</i>              |
| 06  | pze0687784687  | 87,784,687     | 15.3  | 0.15                       | 1.00E-07 | 0.07 | Yes                                        | Cysteine Proteinase                                |
| 06  | pze06132243413 | 132,243,413    | 50.6  | -0.12                      | 2.94E-11 | 0.17 | Yes                                        | Meiotic recombination Spo11                        |
| 06  | pze06137612791 | 137,612,791    | 53.3  | -0.13                      | 1.68E-11 | 0.22 | Yes                                        |                                                    |

Table S13: (continued...Protein)

| Chr | Marker ID      | AGP_v1<br>(bp) | cM    | Effect <sup>a</sup><br>(%) | P-Value  | RMIP | Joint-Linkage<br>QTL Interval <sup>b</sup> | Candidate Gene <sup>c</sup>                                   |
|-----|----------------|----------------|-------|----------------------------|----------|------|--------------------------------------------|---------------------------------------------------------------|
| 06  | pze06137618280 | 137,618,280    | 53.3  | -0.13                      | 3.56E-13 | 0.08 | Yes                                        |                                                               |
| 06  | pze06137783057 | 137,783,057    | 53.4  | -0.10                      | 7.87E-12 | 0.09 | Yes                                        |                                                               |
| 06  | pze06137825948 | 137,825,948    | 53.4  | -0.20                      | 5.67E-14 | 0.08 | Yes                                        | <i>BGLU1</i> (Beta Glucosidase 1)                             |
| 06  | pze06139630511 | 139,630,511    | 54.2  | -0.10                      | 6.88E-09 | 0.06 | Yes                                        |                                                               |
| 06  | pze06144893470 | 144,893,470    | 56.7  | -0.10                      | 1.40E-10 | 0.05 | No                                         |                                                               |
| 06  | pze06164886922 | 164,886,922    | 100.3 | 0.10                       | 1.81E-11 | 0.05 | Yes                                        |                                                               |
| 06  | pze06164950817 | 164,950,817    | 100.7 | 0.10                       | 1.07E-09 | 0.16 | Yes                                        |                                                               |
| 06  | pze06164952310 | 164,952,310    | 100.7 | 0.09                       | 1.98E-09 | 0.15 | Yes                                        |                                                               |
| 06  | pze06165669774 | 165,669,774    | 103.2 | 0.14                       | 4.46E-08 | 0.09 | Yes                                        |                                                               |
| 06  | pze06166173090 | 166,173,090    | 104.9 | 0.12                       | 1.05E-09 | 0.08 | Yes                                        | Zinc Finger (GATA type) family protein                        |
| 06  | pze06166614008 | 166,614,008    | 106.6 | 0.13                       | 1.30E-11 | 0.21 | Yes                                        | Rad21 / Rec8 like protein                                     |
| 07  | pze07114949129 | 114,949,129    | 58.1  | -0.19                      | 1.37E-09 | 0.19 | No                                         |                                                               |
| 07  | pze07126431538 | 126,431,538    | 67.3  | -0.16                      | 1.54E-09 | 0.06 | Yes                                        |                                                               |
| 07  | pze07128349130 | 128,349,130    | 69.8  | -0.13                      | 7.00E-08 | 0.11 | Yes                                        |                                                               |
| 07  | pze07136002039 | 136,002,039    | 74.3  | -0.14                      | 1.43E-07 | 0.14 | Yes                                        |                                                               |
| 07  | pze07140392751 | 140,392,751    | 78.7  | -0.19                      | 2.50E-16 | 0.06 | Yes                                        | <i>PHT4;5</i> (inorganic phosphate transmembrane transporter) |
| 07  | pze07140662870 | 140,662,870    | 79.0  | -0.16                      | 1.71E-16 | 0.06 | Yes                                        |                                                               |

Table S13: (continued...Protein)

| Chr | Marker ID      | AGP_v1<br>(bp) | cM    | Effect <sup>a</sup><br>(%) | P-Value  | RMIP | Joint-Linkage<br>QTL Interval <sup>b</sup> | Candidate Gene <sup>c</sup> |
|-----|----------------|----------------|-------|----------------------------|----------|------|--------------------------------------------|-----------------------------|
| 07  | pze07149948232 | 149,948,232    | 87.8  | -0.12                      | 1.54E-17 | 0.27 | No                                         |                             |
| 07  | pze07154373209 | 154,373,209    | 94.8  | -0.12                      | 9.24E-16 | 0.17 | Yes                                        |                             |
| 07  | pze07155187710 | 155,187,710    | 96.4  | -0.11                      | 2.76E-08 | 0.07 | Yes                                        |                             |
| 07  | pze07156274680 | 156,274,680    | 98.7  | -0.14                      | 7.98E-18 | 0.14 | Yes                                        |                             |
| 07  | pze07156275259 | 156,275,259    | 98.7  | -0.12                      | 3.18E-16 | 0.06 | Yes                                        |                             |
| 08  | pze0873822546  | 73,822,546     | 54.0  | -0.12                      | 3.98E-23 | 0.68 | Yes                                        | Unknown                     |
| 08  | pze0889215231  | 89,215,231     | 55.8  | -0.15                      | 8.96E-24 | 0.09 | No                                         |                             |
| 08  | pze0889804861  | 89,804,861     | 55.8  | -0.12                      | 1.60E-24 | 0.19 | No                                         |                             |
| 08  | pze08130270260 | 130,270,260    | 68.6  | -0.16                      | 9.28E-11 | 0.07 | Yes                                        |                             |
| 08  | pze08145172472 | 145,172,472    | 75.0  | -0.18                      | 6.26E-09 | 0.59 | Yes                                        | Carbonic anhydrase          |
| 08  | pze08149198460 | 149,198,460    | 78.4  | -0.21                      | 5.30E-11 | 0.11 | Yes                                        | IAA8 transcription factor   |
| 08  | pze08163510712 | 163,510,712    | 95.4  | 0.19                       | 8.75E-09 | 0.37 | Yes                                        |                             |
| 08  | pze08164298281 | 164,298,281    | 98.8  | 0.09                       | 1.27E-08 | 0.06 | Yes                                        |                             |
| 08  | pze08165335641 | 165,335,641    | 102.1 | 0.09                       | 2.20E-08 | 0.09 | Yes                                        |                             |
| 09  | pze0908323233  | 8,323,233      | 11.8  | 0.14                       | 1.67E-07 | 0.07 | No                                         |                             |
| 09  | pze09102186205 | 102,186,205    | 51.0  | 0.11                       | 2.28E-11 | 0.06 | No                                         |                             |
| 09  | pze09102433519 | 102,433,519    | 51.1  | 0.12                       | 6.15E-32 | 0.06 | No                                         |                             |

Table S13: (continued...Protein)

| Chr | Marker ID      | AGP_v1<br>(bp) | cM   | Effect <sup>a</sup><br>(%) | P-Value  | RMIP | Joint-Linkage<br>QTL Interval <sup>b</sup> | Candidate Gene <sup>c</sup>                         |
|-----|----------------|----------------|------|----------------------------|----------|------|--------------------------------------------|-----------------------------------------------------|
| 09  | pze09102433540 | 102,433,540    | 51.1 | 0.11                       | 8.99E-12 | 0.10 | No                                         |                                                     |
| 09  | pze09102452830 | 102,452,830    | 51.1 | 0.10                       | 8.22E-12 | 0.13 | No                                         | NC domain-containing protein                        |
| 09  | pze09102494203 | 102,494,203    | 51.1 | 0.10                       | 2.57E-11 | 0.15 | No                                         |                                                     |
| 09  | pze09103811965 | 103,811,965    | 51.6 | 0.11                       | 3.81E-27 | 0.08 | No                                         |                                                     |
| 09  | pze09134852827 | 134,852,827    | 71.6 | 0.10                       | 2.79E-26 | 0.06 | Yes                                        | <i>PAB7</i> (Poly(A) Binding Protein 7)             |
| 09  | pze09135383651 | 135,383,651    | 72.4 | 0.11                       | 2.27E-30 | 0.42 | Yes                                        | <i>TRFL1</i> (TRF-Like 1)                           |
| 09  | pze09135401487 | 135,401,487    | 72.4 | 0.11                       | 2.65E-26 | 0.19 | Yes                                        |                                                     |
| 09  | pze09138490691 | 138,490,691    | 79.2 | 0.12                       | 2.61E-29 | 0.11 | Yes                                        |                                                     |
| 09  | pze09138761646 | 138,761,646    | 79.9 | 0.13                       | 1.42E-15 | 0.14 | Yes                                        |                                                     |
| 09  | pze09142010824 | 142,010,824    | 87.2 | 0.22                       | 4.55E-08 | 0.07 | Yes                                        | Leucine-rich repeat transmembrane protein kinase    |
| 09  | pze09142950644 | 142,950,644    | 89.4 | 0.23                       | 1.63E-07 | 0.12 | Yes                                        | Zinc finger (C3HC4-type RING finger) family protein |
| 10  | pze1000647587  | 647,587        | -4.3 | -0.31                      | 1.14E-07 | 0.07 | No                                         |                                                     |
| 10  | pze1049739669  | 49,739,669     | 36.3 | -0.14                      | 1.35E-12 | 0.26 | Yes                                        |                                                     |
| 10  | pze1050061312  | 50,061,312     | 36.3 | -0.15                      | 1.42E-13 | 0.05 | Yes                                        |                                                     |
| 10  | pze1077008373  | 77,008,373     | 38.5 | -0.12                      | 7.00E-12 | 0.19 | Yes                                        |                                                     |
| 10  | pze1077258298  | 77,258,298     | 38.5 | -0.20                      | 8.47E-14 | 0.06 | Yes                                        |                                                     |
| 10  | pze1083433186  | 83,433,186     | 40.0 | -0.15                      | 9.60E-12 | 0.05 | Yes                                        |                                                     |

Table S13: (continued...Protein)

| Chr | Marker ID      | AGP_v1<br>(bp) | cM    | Effect <sup>a</sup><br>(%) | P-Value  | RMIP | Joint-Linkage<br>QTL Interval <sup>b</sup> | Candidate Gene <sup>c</sup>       |
|-----|----------------|----------------|-------|----------------------------|----------|------|--------------------------------------------|-----------------------------------|
| 10  | pze10128879017 | 128,879,017    | 51.7  | -0.14                      | 2.13E-48 | 0.06 | Yes                                        |                                   |
| 10  | pze10128879122 | 128,879,122    | 51.7  | -0.15                      | 3.23E-49 | 0.07 | Yes                                        |                                   |
| 10  | pze10130522512 | 130,522,512    | 53.3  | -0.14                      | 4.40E-46 | 0.09 | Yes                                        |                                   |
| 10  | pze10131425475 | 131,425,475    | 54.8  | -0.14                      | 6.01E-47 | 0.11 | Yes                                        | Cytokinin dehydrogenase precursor |
| 10  | pze10131716490 | 131,716,490    | 55.2  | -0.16                      | 1.56E-50 | 0.23 | Yes                                        |                                   |
| 10  | pze10131716806 | 131,716,806    | 55.2  | -0.14                      | 2.03E-45 | 0.19 | Yes                                        |                                   |
| 10  | pze10131789724 | 131,789,724    | 55.3  | -0.17                      | 5.95E-47 | 0.09 | Yes                                        |                                   |
| 10  | pze10141182124 | 141,182,124    | 73.6  | -0.14                      | 5.03E-08 | 0.14 | No                                         |                                   |
| 10  | pze10143096411 | 143,096,411    | 80.1  | -0.13                      | 1.25E-08 | 0.12 | No                                         |                                   |
| 10  | pze10146018487 | 146,018,487    | 89.1  | 0.15                       | 2.00E-08 | 0.10 | No                                         |                                   |
| 10  | pze10147958625 | 147,958,625    | 99.1  | 0.17                       | 1.03E-08 | 0.22 | No                                         | Zinc finger, RING-type            |
| 10  | pze10148028746 | 148,028,746    | 99.5  | 0.13                       | 4.23E-08 | 0.24 | No                                         |                                   |
| 10  | pze10148052043 | 148,052,043    | 99.6  | 0.13                       | 6.34E-08 | 0.07 | No                                         | C2 domain-containing protein      |
| 10  | pze10148507725 | 148,507,725    | 102.2 | 0.17                       | 2.33E-09 | 0.05 | No                                         | Nodulin                           |

<sup>a</sup> Percent oil kernel composition on a dry matter basis relative to B73.

<sup>b</sup> 'Yes' = associated SNP is positioned in a NAM joint-linkage QTL interval, and 'No' = associated SNP is located outside a NAM joint-linkage QTL intervals.

<sup>c</sup> Candidate gene described if associated marker is located within the gene.



Table S14: NAM multiple SNP model GWAS associations (RMIP  $\geq 0.05$ ) and overlap with NAM joint-linkage QTL intervals for percent oil on a dry matter basis.

| Chr | Marker ID      | AGP_v1<br>(bp) | cM    | Effect <sup>a</sup><br>(%) | P-Value  | RMIP | Joint-Linkage<br>QTL Interval <sup>b</sup> | Candidate Gene <sup>c</sup>                        |
|-----|----------------|----------------|-------|----------------------------|----------|------|--------------------------------------------|----------------------------------------------------|
| 01  | pze0116416350  | 16,416,350     | 32.9  | 0.10                       | 9.36E-13 | 0.07 | Yes                                        |                                                    |
| 01  | pze0118568101  | 18,568,101     | 35.1  | 0.06                       | 2.45E-14 | 0.18 | Yes                                        |                                                    |
| 01  | pze0119034013  | 19,034,013     | 35.6  | 0.08                       | 7.14E-08 | 0.11 | Yes                                        |                                                    |
| 01  | pze0122489200  | 22,489,200     | 39.4  | 0.06                       | 6.68E-14 | 0.07 | Yes                                        |                                                    |
| 01  | pze0125332530  | 25,332,530     | 42.2  | 0.06                       | 1.92E-18 | 0.05 | Yes                                        | <i>MIPS2</i> (Myo-Inositol-1-Phosphate Synthase 2) |
| 01  | pze0125468628  | 25,468,628     | 42.4  | 0.06                       | 7.78E-12 | 0.13 | Yes                                        |                                                    |
| 01  | pze0127054049  | 27,054,049     | 44.6  | 0.08                       | 1.74E-07 | 0.26 | Yes                                        |                                                    |
| 01  | pze0174517643  | 74,517,643     | 79.1  | -0.07                      | 2.05E-08 | 0.13 | No                                         |                                                    |
| 01  | pze01198964527 | 198,964,527    | 112.3 | 0.07                       | 4.99E-20 | 0.39 | No                                         |                                                    |
| 01  | pze01200550540 | 200,550,540    | 114.1 | 0.09                       | 1.99E-18 | 0.25 | No                                         |                                                    |
| 01  | pze01203289133 | 203,289,133    | 116.3 | 0.06                       | 4.96E-15 | 0.11 | Yes                                        |                                                    |
| 01  | pze01210953214 | 210,953,214    | 122.6 | 0.05                       | 1.01E-07 | 0.06 | Yes                                        |                                                    |
| 01  | pze01240495541 | 240,495,541    | 141.9 | 0.05                       | 6.18E-08 | 0.09 | Yes                                        |                                                    |
| 01  | pze01240496258 | 240,496,258    | 141.9 | 0.06                       | 1.19E-08 | 0.08 | Yes                                        |                                                    |
| 01  | pze01294901080 | 294,901,080    | 198.0 | 0.06                       | 4.00E-14 | 0.05 | Yes                                        |                                                    |
| 01  | pze01295090084 | 295,090,084    | 198.3 | 0.07                       | 5.91E-15 | 0.09 | Yes                                        |                                                    |
| 01  | pze01295763463 | 295,763,463    | 199.4 | 0.05                       | 2.11E-16 | 0.11 | Yes                                        |                                                    |

Table S14: (continued...Oil)

| Chr | Marker ID      | AGP_v1<br>(bp) | cM    | Effect <sup>a</sup><br>(%) | P-Value  | RMIP | Joint-Linkage<br>QTL Interval <sup>b</sup> | Candidate Gene <sup>c</sup>                                               |
|-----|----------------|----------------|-------|----------------------------|----------|------|--------------------------------------------|---------------------------------------------------------------------------|
| 01  | pze01295769034 | 295,769,034    | 199.4 | 0.05                       | 4.04E-15 | 0.34 | Yes                                        |                                                                           |
| 02  | pze0211679968  | 11,679,968     | 33.6  | 0.12                       | 1.79E-08 | 0.05 | No                                         |                                                                           |
| 02  | pze0220326346  | 20,326,346     | 51.1  | -0.07                      | 5.08E-09 | 0.16 | No                                         | <i>CNX5</i> (Co-Factor for Nitrate Reductase and Xanthine Dehydrogenas 5) |
| 02  | pze0220326432  | 20,326,432     | 51.1  | -0.07                      | 7.31E-13 | 0.05 | No                                         | <i>CNX5</i> (Co-Factor for Nitrate Reductase and Xanthine Dehydrogenas 5) |
| 02  | pze0220327496  | 20,327,496     | 51.1  | -0.06                      | 1.13E-08 | 0.64 | No                                         | <i>CNX5</i> (Co-Factor for Nitrate Reductase and Xanthine Dehydrogenas 5) |
| 02  | pze0239068567  | 39,068,567     | 66.8  | -0.05                      | 1.67E-20 | 0.10 | Yes                                        |                                                                           |
| 02  | pze0244884255  | 44,884,255     | 69.7  | -0.05                      | 1.27E-19 | 0.23 | Yes                                        | <i>ABA1</i> (ABA Deficient 1, zeaxanthin epoxidase)                       |
| 02  | pze0249122012  | 49,122,012     | 71.3  | -0.05                      | 2.70E-18 | 0.14 | Yes                                        | U-box domain containing protein                                           |
| 02  | pze0249125290  | 49,125,290     | 71.3  | -0.05                      | 1.44E-19 | 0.14 | Yes                                        |                                                                           |
| 02  | pze02125195471 | 125,195,471    | 77.4  | -0.07                      | 3.41E-11 | 0.20 | Yes                                        |                                                                           |
| 02  | pze02172957702 | 172,957,702    | 85.1  | -0.06                      | 2.18E-07 | 0.05 | No                                         |                                                                           |
| 02  | pze02173076399 | 173,076,399    | 85.2  | -0.08                      | 3.46E-09 | 0.05 | No                                         | <i>SCPL18</i> (Serine carboxypeptidase-like 18)                           |
| 02  | pze02183780201 | 183,780,201    | 94.0  | 0.10                       | 3.13E-09 | 0.06 | No                                         |                                                                           |
| 02  | pze02188225260 | 188,225,260    | 99.8  | 0.10                       | 7.69E-08 | 0.19 | No                                         |                                                                           |
| 02  | pze02201845456 | 201,845,456    | 109.6 | 0.10                       | 5.74E-08 | 0.18 | No                                         |                                                                           |
| 03  | pze0302103927  | 2,103,927      | 4.5   | -0.06                      | 1.56E-08 | 0.21 | No                                         |                                                                           |
| 03  | pze0302105219  | 2,105,219      | 4.5   | -0.07                      | 3.77E-09 | 0.05 | No                                         |                                                                           |

Table S14: (continued...Oil)

| Chr | Marker ID      | AGP_v1<br>(bp) | cM    | Effect <sup>a</sup><br>(%) | P-Value  | RMIP | Joint-Linkage<br>QTL Interval <sup>b</sup> | Candidate Gene <sup>c</sup>                              |
|-----|----------------|----------------|-------|----------------------------|----------|------|--------------------------------------------|----------------------------------------------------------|
| 03  | pze0308839067  | 8,839,067      | 31.7  | -0.07                      | 1.04E-08 | 0.14 | No                                         | PHD finger family protein                                |
| 03  | pze0316337497  | 16,337,497     | 44.0  | -0.08                      | 8.92E-13 | 0.12 | No                                         |                                                          |
| 03  | pze0335980205  | 35,980,205     | 55.3  | -0.07                      | 8.08E-12 | 0.08 | Yes                                        |                                                          |
| 03  | pze0342757479  | 42,757,479     | 55.9  | 0.02                       | 1.95E-09 | 0.09 | Yes                                        | G protein-coupled receptor GPR1                          |
| 03  | pze0358388350  | 58,388,350     | 57.7  | -0.07                      | 1.66E-11 | 0.23 | Yes                                        | Serine/threonine protein kinase                          |
| 03  | pze03111141904 | 111,141,904    | 58.9  | -0.08                      | 2.74E-13 | 0.11 | Yes                                        |                                                          |
| 03  | pze03179802623 | 179,802,623    | 91.7  | 0.07                       | 5.59E-16 | 0.17 | No                                         |                                                          |
| 03  | pze03179804597 | 179,804,597    | 91.7  | 0.06                       | 1.52E-13 | 0.13 | No                                         |                                                          |
| 03  | pze03179938275 | 179,938,275    | 92.0  | 0.06                       | 1.36E-15 | 0.21 | No                                         |                                                          |
| 03  | pze03194187278 | 194,187,278    | 102.3 | 0.05                       | 1.19E-07 | 0.07 | Yes                                        |                                                          |
| 03  | pze03194648926 | 194,648,926    | 103.0 | 0.06                       | 2.61E-16 | 0.08 | Yes                                        |                                                          |
| 03  | pze03198398046 | 198,398,046    | 105.5 | 0.07                       | 1.90E-13 | 0.05 | Yes                                        | UDP-glucuronosyl/UDP-glucosyl transferase family protein |
| 03  | pze03205226976 | 205,226,976    | 113.7 | 0.07                       | 5.40E-08 | 0.10 | Yes                                        |                                                          |
| 03  | pze03211146687 | 211,146,687    | 121.9 | 0.06                       | 9.31E-08 | 0.15 | No                                         |                                                          |
| 03  | pze03211151474 | 211,151,474    | 121.9 | 0.06                       | 1.51E-07 | 0.09 | No                                         |                                                          |
| 03  | pze03220114561 | 220,114,561    | 137.4 | -0.05                      | 2.78E-07 | 0.06 | No                                         | <i>ALDH2C4</i> (3-chloroallyl aldehyde dehydrogenase)    |
| 04  | pze0406032338  | 6,032,338      | 20.4  | 0.08                       | 9.92E-08 | 0.15 | No                                         |                                                          |

Table S14: (continued...Oil)

| Chr | Marker ID      | AGP_v1<br>(bp) | cM    | Effect <sup>a</sup><br>(%) | P-Value  | RMIP | Joint-Linkage<br>QTL Interval <sup>b</sup> | Candidate Gene <sup>c</sup>                                                      |
|-----|----------------|----------------|-------|----------------------------|----------|------|--------------------------------------------|----------------------------------------------------------------------------------|
| 04  | pze0422895076  | 22,895,076     | 46.3  | 0.08                       | 1.83E-08 | 0.07 | No                                         |                                                                                  |
| 04  | pze0492992084  | 92,992,084     | 57.6  | 0.06                       | 2.77E-08 | 0.09 | Yes                                        |                                                                                  |
| 04  | pze04108097627 | 108,097,627    | 58.0  | 0.10                       | 1.43E-10 | 0.07 | Yes                                        |                                                                                  |
| 04  | pze04120561643 | 120,561,643    | 58.3  | 0.06                       | 2.73E-19 | 0.08 | Yes                                        |                                                                                  |
| 04  | pze04123294754 | 123,294,754    | 58.3  | 0.07                       | 4.02E-10 | 0.10 | Yes                                        |                                                                                  |
| 04  | pze04123329276 | 123,329,276    | 58.3  | 0.06                       | 1.14E-17 | 0.14 | Yes                                        |                                                                                  |
| 04  | pze04123343028 | 123,343,028    | 58.3  | 0.06                       | 5.71E-19 | 0.11 | Yes                                        |                                                                                  |
| 04  | pze04163300645 | 163,300,645    | 73.4  | 0.07                       | 1.11E-18 | 0.35 | No                                         |                                                                                  |
| 04  | pze04163338800 | 163,338,800    | 73.4  | 0.06                       | 1.81E-18 | 0.08 | No                                         |                                                                                  |
| 04  | pze04172652992 | 172,652,992    | 82.3  | 0.05                       | 4.73E-11 | 0.05 | Yes                                        |                                                                                  |
| 04  | pze04172658360 | 172,658,360    | 82.3  | 0.08                       | 4.12E-11 | 0.05 | Yes                                        |                                                                                  |
| 04  | pze04172891298 | 172,891,298    | 82.7  | 0.05                       | 2.91E-07 | 0.05 | Yes                                        | <i>ERF</i> (Ethylene Response Factor B-6 of ERF/AP2 transcription factor family) |
| 04  | pze04173560682 | 173,560,682    | 83.8  | 0.08                       | 1.15E-17 | 0.16 | Yes                                        |                                                                                  |
| 04  | pze04205693464 | 205,693,464    | 108.2 | -0.05                      | 2.86E-11 | 0.08 | No                                         |                                                                                  |
| 04  | pze04209879821 | 209,879,821    | 109.4 | -0.06                      | 3.20E-11 | 0.19 | No                                         |                                                                                  |
| 04  | pze04209879846 | 209,879,846    | 109.4 | -0.06                      | 6.00E-13 | 0.39 | No                                         |                                                                                  |
| 04  | pze04242018671 | 242,018,671    | 128.1 | -0.06                      | 3.41E-12 | 0.05 | No                                         |                                                                                  |

Table S14: (continued...Oil)

| Chr | Marker ID      | AGP_v1<br>(bp) | cM    | Effect <sup>a</sup><br>(%) | P-Value  | RMIP | Joint-Linkage<br>QTL Interval <sup>b</sup> | Candidate Gene <sup>c</sup>                     |
|-----|----------------|----------------|-------|----------------------------|----------|------|--------------------------------------------|-------------------------------------------------|
| 04  | pze04242648433 | 242,648,433    | 130.6 | -0.05                      | 1.23E-11 | 0.23 | No                                         | Sugar isomerase (SIS) domain-containing protein |
| 05  | pze0503525173  | 3,525,173      | 10.9  | 0.07                       | 5.48E-10 | 0.05 | Yes                                        | <i>PSAD-2</i> (photosystem I subunit D-2)       |
| 05  | pze0504091479  | 4,091,479      | 12.9  | 0.06                       | 8.64E-09 | 0.63 | Yes                                        | Histone H1.2                                    |
| 05  | pze0504901650  | 4,901,650      | 16.9  | 0.07                       | 2.70E-10 | 0.11 | Yes                                        |                                                 |
| 05  | pze0505307997  | 5,307,997      | 19.0  | 0.05                       | 6.24E-11 | 0.07 | Yes                                        |                                                 |
| 05  | pze0511742915  | 11,742,915     | 36.5  | -0.06                      | 1.08E-10 | 0.18 | Yes                                        |                                                 |
| 05  | pze0511879036  | 11,879,036     | 37.3  | -0.06                      | 1.19E-12 | 0.46 | Yes                                        |                                                 |
| 05  | pze0511879078  | 11,879,078     | 37.3  | -0.06                      | 6.72E-09 | 0.18 | Yes                                        |                                                 |
| 05  | pze0546081614  | 46,081,614     | 60.0  | 0.09                       | 2.68E-08 | 0.06 | Yes                                        |                                                 |
| 05  | pze0547984914  | 47,984,914     | 60.3  | 0.08                       | 9.04E-29 | 0.07 | Yes                                        |                                                 |
| 05  | pze0551583383  | 51,583,383     | 61.1  | 0.07                       | 1.15E-31 | 0.38 | Yes                                        | Iron ion binding / oxidoreductase               |
| 05  | pze0551720445  | 51,720,445     | 61.1  | 0.07                       | 4.13E-30 | 0.11 | Yes                                        | Unknown                                         |
| 05  | pze0552059382  | 52,059,382     | 61.2  | 0.07                       | 2.34E-25 | 0.07 | Yes                                        | <i>RPA2</i> (Replicon Protein A2)               |
| 05  | pze0552835376  | 52,835,376     | 61.3  | 0.08                       | 8.80E-26 | 0.14 | Yes                                        |                                                 |
| 05  | pze0557934465  | 57,934,465     | 62.4  | 0.07                       | 2.42E-29 | 0.10 | Yes                                        | Chloroplast thylakoid lumen protein             |
| 05  | pze05173565198 | 173,565,198    | 85.1  | 0.07                       | 2.38E-09 | 0.08 | No                                         |                                                 |
| 05  | pze05174885784 | 174,885,784    | 86.6  | 0.08                       | 5.81E-09 | 0.08 | No                                         | Unknown                                         |

Table S14: (continued...Oil)

| Chr | Marker ID      | AGP_v1<br>(bp) | cM    | Effect <sup>a</sup><br>(%) | P-Value  | RMIP | Joint-Linkage<br>QTL Interval <sup>b</sup> | Candidate Gene <sup>c</sup>                                      |
|-----|----------------|----------------|-------|----------------------------|----------|------|--------------------------------------------|------------------------------------------------------------------|
| 05  | pze05175579810 | 175,579,810    | 87.3  | 0.04                       | 3.14E-08 | 0.06 | Yes                                        |                                                                  |
| 05  | pze05187894128 | 187,894,128    | 97.7  | 0.05                       | 1.36E-08 | 0.08 | Yes                                        | Unknown                                                          |
| 05  | pze05212800876 | 212,800,876    | 142.3 | -0.06                      | 6.43E-08 | 0.28 | No                                         |                                                                  |
| 06  | pze06103555835 | 103,555,835    | 29.3  | 0.10                       | 3.04E-21 | 0.05 | Yes                                        |                                                                  |
| 06  | pze06103696732 | 103,696,732    | 29.5  | 0.13                       | 6.23E-14 | 0.05 | Yes                                        |                                                                  |
| 06  | pze06103835279 | 103,835,279    | 29.6  | 0.11                       | 6.88E-17 | 0.06 | Yes                                        |                                                                  |
| 06  | pze06105014855 | 105,014,855    | 30.8  | 0.18                       | 8.91E-43 | 0.31 | Yes                                        | <i>DGATI-2</i> (type I acyl-CoA:diacylglycerol acyltransferase ) |
| 06  | pze06105019473 | 105,019,473    | 30.8  | 0.13                       | 4.31E-49 | 0.67 | Yes                                        | <i>DGATI-2</i> (type I acyl-CoA:diacylglycerol acyltransferase ) |
| 06  | pze06106914732 | 106,914,732    | 32.8  | 0.05                       | 2.69E-07 | 0.08 | Yes                                        |                                                                  |
| 06  | pze06110008048 | 110,008,048    | 36.5  | 0.10                       | 3.69E-16 | 0.06 | Yes                                        |                                                                  |
| 06  | pze06110413739 | 110,413,739    | 37.0  | 0.16                       | 1.79E-12 | 0.11 | Yes                                        |                                                                  |
| 06  | pze06110952436 | 110,952,436    | 37.7  | 0.08                       | 5.76E-14 | 0.09 | Yes                                        |                                                                  |
| 06  | pze06112065791 | 112,065,791    | 39.0  | 0.13                       | 2.82E-16 | 0.58 | Yes                                        |                                                                  |
| 06  | pze06131405628 | 131,405,628    | 50.0  | -0.12                      | 2.45E-08 | 0.69 | No                                         | <i>ATGA2OX3</i> (gibberellin 2-oxidase 3)                        |
| 06  | pze06146638392 | 146,638,392    | 58.3  | 0.05                       | 2.05E-07 | 0.06 | Yes                                        | CUE domain containing protein                                    |
| 06  | pze06146859183 | 146,859,183    | 58.6  | 0.07                       | 1.10E-08 | 0.05 | Yes                                        | <i>PTR2</i> (Peptide transporter)                                |
| 06  | pze06151712033 | 151,712,033    | 65.8  | 0.07                       | 9.81E-10 | 0.05 | No                                         |                                                                  |

Table S14: (continued...Oil)

| Chr | Marker ID      | AGP_v1<br>(bp) | cM    | Effect <sup>a</sup><br>(%) | P-Value  | RMIP | Joint-Linkage<br>QTL Interval <sup>b</sup> | Candidate Gene <sup>c</sup>                                                    |
|-----|----------------|----------------|-------|----------------------------|----------|------|--------------------------------------------|--------------------------------------------------------------------------------|
| 06  | pze06153418317 | 153,418,317    | 68.6  | 0.05                       | 2.49E-08 | 0.08 | No                                         |                                                                                |
| 06  | pze06153910135 | 153,910,135    | 69.4  | 0.04                       | 2.57E-09 | 0.17 | No                                         | Allergen-related                                                               |
| 06  | pze06164606481 | 164,606,481    | 98.5  | 0.09                       | 1.68E-09 | 0.11 | No                                         |                                                                                |
| 06  | pze06166173995 | 166,173,995    | 104.9 | 0.11                       | 8.79E-10 | 0.18 | No                                         | Transcription factor                                                           |
| 06  | pze06169226283 | 169,226,283    | 108.7 | 0.08                       | 8.36E-09 | 0.17 | No                                         |                                                                                |
| 07  | pze0786521550  | 86,521,550     | 50.0  | 0.04                       | 4.38E-10 | 0.05 | Yes                                        |                                                                                |
| 07  | pze0790011130  | 90,011,130     | 50.1  | 0.05                       | 2.65E-08 | 0.06 | Yes                                        |                                                                                |
| 07  | pze0798440879  | 98,440,879     | 50.8  | 0.04                       | 2.32E-09 | 0.14 | Yes                                        | Armadillo/beta-catenin repeat family protein / U-box domain-containing protein |
| 07  | pze0798745124  | 98,745,124     | 50.8  | 0.04                       | 4.28E-10 | 0.27 | Yes                                        |                                                                                |
| 07  | pze0798963774  | 98,963,774     | 50.8  | 0.05                       | 3.70E-09 | 0.06 | Yes                                        |                                                                                |
| 07  | pze07106530799 | 106,530,799    | 53.8  | 0.05                       | 5.15E-09 | 0.05 | Yes                                        |                                                                                |
| 07  | pze07109178008 | 109,178,008    | 55.2  | 0.04                       | 1.33E-08 | 0.09 | Yes                                        |                                                                                |
| 08  | pze08151664284 | 151,664,284    | 80.4  | 0.07                       | 6.17E-19 | 0.05 | Yes                                        |                                                                                |
| 08  | pze08153813784 | 153,813,784    | 81.3  | 0.08                       | 2.13E-20 | 0.17 | Yes                                        | <i>BRII</i> (Brassinosteroid Insensitive 1)                                    |
| 08  | pze08153813786 | 153,813,786    | 81.3  | 0.09                       | 1.40E-18 | 0.06 | Yes                                        | <i>BRII</i> (Brassinosteroid Insensitive 1)                                    |
| 08  | pze08155478153 | 155,478,153    | 82.3  | 0.08                       | 3.95E-19 | 0.14 | Yes                                        |                                                                                |
| 08  | pze08155478230 | 155,478,230    | 82.3  | 0.08                       | 2.71E-18 | 0.53 | Yes                                        |                                                                                |

Table S14: (continued...Oil)

| Chr | Marker ID      | AGP_v1<br>(bp) | cM   | Effect <sup>a</sup><br>(%) | P-Value  | RMIP | Joint-Linkage<br>QTL Interval <sup>b</sup> | Candidate Gene <sup>c</sup>          |
|-----|----------------|----------------|------|----------------------------|----------|------|--------------------------------------------|--------------------------------------|
| 09  | pze0921934769  | 21,934,769     | 38.7 | 0.09                       | 4.07E-08 | 0.05 | No                                         |                                      |
| 09  | pze0921983416  | 21,983,416     | 38.8 | 0.15                       | 5.54E-08 | 0.09 | No                                         |                                      |
| 09  | pze0926515022  | 26,515,022     | 43.3 | 0.09                       | 2.25E-07 | 0.08 | No                                         |                                      |
| 09  | pze09113469332 | 113,469,332    | 56.0 | -0.12                      | 6.18E-14 | 0.05 | No                                         |                                      |
| 09  | pze09117897621 | 117,897,621    | 57.7 | -0.08                      | 9.99E-14 | 0.36 | Yes                                        | <i>SUS4</i> (Sucrose Synthase)       |
| 09  | pze09118277164 | 118,277,164    | 58.0 | -0.08                      | 1.63E-13 | 0.11 | Yes                                        | Unknown                              |
| 09  | pze09120796850 | 120,796,850    | 59.7 | -0.09                      | 3.16E-11 | 0.07 | Yes                                        |                                      |
| 09  | pze09122959898 | 122,959,898    | 61.2 | -0.05                      | 2.87E-10 | 0.08 | Yes                                        | <i>CYP709B2</i> (electron carrier)   |
| 09  | pze09123776478 | 123,776,478    | 61.8 | -0.06                      | 2.29E-08 | 0.05 | Yes                                        |                                      |
| 09  | pze09129555959 | 129,555,959    | 64.6 | -0.06                      | 6.25E-11 | 0.13 | Yes                                        | ABC transporter, ATP-binding protein |
| 09  | pze09141771810 | 141,771,810    | 86.9 | -0.06                      | 2.01E-08 | 0.19 | No                                         |                                      |
| 10  | pze10134625388 | 134,625,388    | 59.4 | -0.05                      | 1.87E-12 | 0.21 | Yes                                        |                                      |
| 10  | pze10134625403 | 134,625,403    | 59.4 | -0.06                      | 5.16E-12 | 0.12 | Yes                                        |                                      |
| 10  | pze10136116629 | 136,116,629    | 62.0 | -0.09                      | 9.16E-12 | 0.14 | No                                         |                                      |
| 10  | pze10137549553 | 137,549,553    | 64.8 | -0.06                      | 5.25E-14 | 0.11 | No                                         |                                      |
| 10  | pze10137660662 | 137,660,662    | 64.9 | -0.06                      | 6.34E-12 | 0.05 | No                                         |                                      |

<sup>a</sup> Percent oil kernel composition on a dry matter basis relative to B73.

<sup>b</sup> 'Yes' = associated SNP is positioned in a NAM joint-linkage QTL interval, and 'No' = associated SNP is located outside a NAM joint-linkage QTL intervals.

<sup>c</sup> Candidate gene described if associated marker is located within the gene.



Table S15: Overlap between NAM Joint-linkage QTL and previously identified biparental QTL.

| Trait  | Chr.Bin | Marker/Interval           | NAM-QTL Overlap | Population Parentals <sup>(Reference)</sup>               |
|--------|---------|---------------------------|-----------------|-----------------------------------------------------------|
| Starch | 1.01    | <i>php20689</i>           | Yes             | Illinois High Protein x Illinois Low Protein <sup>1</sup> |
| Starch | 1.01/02 | <i>php20689–bnlg1429</i>  | Yes             | Illinois High Oil x B73 <sup>2</sup>                      |
| Starch | 1.02    | <i>bmc1953</i>            | No              | Illinois High Protein x Illinois Low Protein <sup>1</sup> |
| Starch | 1.02/03 | <i>bnlg1429–bnl12.06</i>  | No              | Illinois High Oil x Mo17 <sup>2</sup>                     |
| Starch | 1.03    | <i>bmc1866</i>            | No              | Illinois High Protein x Illinois Low Protein <sup>1</sup> |
| Starch | 1.04    | <i>npi262</i>             | No              | Illinois High Protein x Illinois Low Protein <sup>1</sup> |
| Starch | 1.04    | <i>npi262</i>             | No              | Illinois High Protein x Illinois Low Protein <sup>5</sup> |
| Starch | 1.06    | <i>umc67a</i>             | No              | Illinois High Protein x Illinois Low Protein <sup>1</sup> |
| Starch | 1.07    | <i>umc23a</i>             | No              | Illinois High Protein x Illinois Low Protein <sup>1</sup> |
| Starch | 1.07/08 | <i>umc33a–dupssr12</i>    | No              | Illinois High Oil x B73 <sup>2</sup>                      |
| Starch | 1.08    | <i>umc128</i>             | No              | Illinois High Protein x Illinois Low Protein <sup>1</sup> |
| Starch | 1.08    | <i>bmc1643</i>            | Yes             | Illinois High Protein x Illinois Low Protein <sup>1</sup> |
| Starch | 1.11    | <i>npi238</i>             | No              | Illinois High Protein x Illinois Low Protein <sup>1</sup> |
| Starch | 2.03    | <i>umc6a</i>              | No              | Illinois High Protein x Illinois Low Protein <sup>1</sup> |
| Starch | 2.04    | <i>bnl12.09</i>           | No              | Illinois High Protein x Illinois Low Protein <sup>1</sup> |
| Starch | 2.05    | <i>dupssr21</i>           | Yes             | Illinois High Protein x Illinois Low Protein <sup>1</sup> |
| Starch | 2.06/07 | <i>npi337</i>             | No              | Illinois High Protein x Illinois Low Protein <sup>1</sup> |
| Starch | 2.07    | <i>umc5a</i>              | No              | Illinois High Protein x Illinois Low Protein <sup>1</sup> |
| Starch | 2.08    | <i>npi298</i>             | No              | Illinois High Protein x Illinois Low Protein <sup>1</sup> |
| Starch | 2.08    | <i>umc125</i>             | No              | Illinois High Protein x Illinois Low Protein <sup>5</sup> |
| Starch | 2.10    | <i>bnl17.14</i>           | No              | Illinois High Protein x Illinois Low Protein <sup>1</sup> |
| Starch | 3.02    | <i>bmc1144</i>            | No              | Illinois High Protein x Illinois Low Protein <sup>1</sup> |
| Starch | 3.03    | <i>php20042</i>           | No              | Illinois High Protein x Illinois Low Protein <sup>1</sup> |
| Starch | 3.03    | <i>bmc1523</i>            | No              | Illinois High Protein x Illinois Low Protein <sup>1</sup> |
| Starch | 3.03    | <i>npi269</i>             | No              | Illinois High Protein x Illinois Low Protein <sup>5</sup> |
| Starch | 3.04    | <i>umc154</i>             | No              | Illinois High Protein x Illinois Low Protein <sup>1</sup> |
| Starch | 3.04    | <i>umc10</i>              | No              | Illinois High Protein x Illinois Low Protein <sup>5</sup> |
| Starch | 3.04    | <i>npi249</i>             | No              | Illinois High Protein x Illinois Low Protein <sup>5</sup> |
| Starch | 3.04    | <i>phi036–bnlg1019a</i>   | No              | Illinois High Oil x B73 <sup>2</sup>                      |
| Starch | 3.05    | <i>phi073</i>             | No              | Illinois High Protein x Illinois Low Protein <sup>1</sup> |
| Starch | 3.06    | <i>bnl5.37b</i>           | No              | Illinois High Protein x Illinois Low Protein <sup>1</sup> |
| Starch | 3.06/07 | <i>bnlg1047a–bnlg1605</i> | No              | Illinois High Oil x B73 <sup>2</sup>                      |
| Starch | 3.06/07 | <i>bnlg1605–bnlg197</i>   | No              | Illinois High Oil x B73 <sup>2</sup>                      |

Table S15: (continued...)

| Trait  | Chr.Bin | Marker/Interval           | NAM-QTL Overlap | Population Parentals <sup>(Reference)</sup>               |
|--------|---------|---------------------------|-----------------|-----------------------------------------------------------|
| Starch | 3.07    | <i>bnl5.33b</i>           | Yes             | Illinois High Protein x Illinois Low Protein <sup>1</sup> |
| Starch | 3.07    | <i>umc16</i>              | Yes             | Illinois High Protein x Illinois Low Protein <sup>5</sup> |
| Starch | 3.08    | <i>umc16a</i>             | Yes             | Illinois High Protein x Illinois Low Protein <sup>1</sup> |
| Starch | 3.08    | <i>npi432</i>             | No              | Illinois High Protein x Illinois Low Protein <sup>5</sup> |
| Starch | 3.08    | <i>umc17</i>              | Yes             | Illinois High Protein x Illinois Low Protein <sup>5</sup> |
| Starch | 3.09    | <i>php20726</i>           | Yes             | Illinois High Protein x Illinois Low Protein <sup>1</sup> |
| Starch | 3.09    | <i>sh2</i>                | Yes             | Illinois High Protein x Illinois Low Protein <sup>1</sup> |
| Starch | 3.09    | <i>umc63a</i>             | Yes             | Illinois High Protein x Illinois Low Protein <sup>1</sup> |
| Starch | 3.09    | <i>umc96</i>              | Yes             | Illinois High Protein x Illinois Low Protein <sup>1</sup> |
| Starch | 3.09    | <i>Sh2</i>                | Yes             | Illinois High Protein x Illinois Low Protein <sup>5</sup> |
| Starch | 3.09    | <i>umc63</i>              | Yes             | Illinois High Protein x Illinois Low Protein <sup>5</sup> |
| Starch | 3.09    | <i>umc96</i>              | Yes             | Illinois High Protein x Illinois Low Protein <sup>5</sup> |
| Starch | 4.03/05 | <i>nc004-phi026</i>       | No              | Illinois High Oil x Mo17 <sup>2</sup>                     |
| Starch | 4.04/05 | <i>phi096-nc005</i>       | No              | Illinois High Oil x B73 <sup>2</sup>                      |
| Starch | 5.01    | <i>umc72A</i>             | No              | Illinois High Protein x Illinois Low Protein <sup>5</sup> |
| Starch | 5.02    | <i>umc90</i>              | No              | Illinois High Protein x Illinois Low Protein <sup>5</sup> |
| Starch | 5.03    | <i>php20872</i>           | No              | Illinois High Protein x Illinois Low Protein <sup>1</sup> |
| Starch | 5.03    | <i>umc1</i>               | No              | Illinois High Protein x Illinois Low Protein <sup>5</sup> |
| Starch | 5.03    | <i>php15018- CO7CO2CD</i> | No              | Illinois High Oil x B73 <sup>2</sup>                      |
| Starch | 5.03    | <i>CO7BO2CD- php10014</i> | ?               | Illinois High Oil x Mo17 <sup>2</sup>                     |
| Starch | 5.05    | <i>npi237</i>             | No              | Illinois High Protein x Illinois Low Protein <sup>5</sup> |
| Starch | 5.07    | <i>php20053-phi048</i>    | No              | Illinois High Oil x Mo17 <sup>2</sup>                     |
| Starch | 6.00/01 | <i>phi126-y1ssr</i>       | Yes             | Illinois High Oil x Mo17 <sup>2</sup>                     |
| Starch | 6.05    | <i>umc21</i>              | No              | Illinois High Protein x Illinois Low Protein <sup>5</sup> |
| Starch | 7.03    | <i>php20746</i>           | No              | Illinois High Protein x Illinois Low Protein <sup>1</sup> |
| Starch | 7.04    | <i>bnl8.39</i>            | Yes             | Illinois High Protein x Illinois Low Protein <sup>5</sup> |
| Starch | 7.06    | <i>php20020</i>           | No              | Illinois High Protein x Illinois Low Protein <sup>1</sup> |
| Starch | 7L      | <i>P200746</i>            | ?               | Illinois High Protein x Illinois Low Protein <sup>5</sup> |
| Starch | 8.02    | <i>bnl09.11a</i>          | No              | Illinois High Protein x Illinois Low Protein <sup>1</sup> |
| Starch | 8.03    | <i>npi260b</i>            | Yes             | Illinois High Protein x Illinois Low Protein <sup>1</sup> |
| Starch | 8.03/04 | <i>bnl9.08</i>            | Yes             | Illinois High Protein x Illinois Low Protein <sup>1</sup> |

Table S15: (continued...)

| Trait   | Chr.Bin | Marker/Interval         | NAM-QTL Overlap | Population Parentals <sup>(Reference)</sup>               |
|---------|---------|-------------------------|-----------------|-----------------------------------------------------------|
| Starch  | 8.05    | <i>umc2c</i>            | No              | Illinois High Protein x Illinois Low Protein <sup>1</sup> |
| Starch  | 8.05    | <i>bnlg162–bnlg1599</i> | No              | Illinois High Oil x B73 <sup>2</sup>                      |
| Starch  | 8.08    | <i>umc7</i>             | No              | Illinois High Protein x Illinois Low Protein <sup>1</sup> |
| Starch  | 9.03    | <i>php20075b</i>        | Yes             | Illinois High Protein x Illinois Low Protein <sup>1</sup> |
| Starch  | 9.03    | <i>phi027–umc81</i>     | Yes             | Illinois High Oil x Mo17 <sup>2</sup>                     |
| Starch  | 9.05    | <i>npi443</i>           | No              | Illinois High Protein x Illinois Low Protein <sup>5</sup> |
| Starch  | 10.00   | <i>phi118</i>           | ?               | Illinois High Protein x Illinois Low Protein <sup>1</sup> |
| Starch  | 10.00   | <i>bnl10.17a</i>        | No              | Illinois High Protein x Illinois Low Protein <sup>1</sup> |
| Starch  | 10.02   | <i>npi285a</i>          | Yes             | Illinois High Protein x Illinois Low Protein <sup>1</sup> |
| Starch  | 10.03   | <i>umc130</i>           | Yes             | Illinois High Protein x Illinois Low Protein <sup>1</sup> |
| Starch  | 10.07   | <i>npi320</i>           | No              | Illinois High Protein x Illinois Low Protein <sup>1</sup> |
| Starch  | 10.07   | <i>bmc1185</i>          | No              | Illinois High Protein x Illinois Low Protein <sup>1</sup> |
| Protein | 1.01    | <i>php20689</i>         | No              | Illinois High Protein x Illinois Low Protein <sup>1</sup> |
| Protein | 1.02    | <i>bmc1953</i>          | No              | Illinois High Protein x Illinois Low Protein <sup>1</sup> |
| Protein | 1.02/03 | <i>bnlg1429–bnl1206</i> | No              | Illinois High Oil x Mo17 <sup>2</sup>                     |
| Protein | 1.03    | <i>bmc1866</i>          | Yes             | Illinois High Protein x Illinois Low Protein <sup>1</sup> |
| Protein | 1.04    | <i>npi262</i>           | No              | Illinois High Protein x Illinois Low Protein <sup>1</sup> |
| Protein | 1.06    | <i>umc67a</i>           | No              | Illinois High Protein x Illinois Low Protein <sup>1</sup> |
| Protein | 1.07    | <i>umc23a</i>           | No              | Illinois High Protein x Illinois Low Protein <sup>1</sup> |
| Protein | 1.07    | <i>npi447</i>           | Yes             | Illinois High Protein x Illinois Low Protein <sup>5</sup> |
| Protein | 1.07    | <i>cfbbi58–php20668</i> | ?               | Illinois High Oil x B73 <sup>2</sup>                      |
| Protein | 1.08    | <i>umc128</i>           | No              | Illinois High Protein x Illinois Low Protein <sup>1</sup> |
| Protein | 1.08    | <i>bmc1643</i>          | Yes             | Illinois High Protein x Illinois Low Protein <sup>1</sup> |
| Protein | 1.11    | <i>npi238</i>           | No              | Illinois High Protein x Illinois Low Protein <sup>1</sup> |
| Protein | 2.03    | <i>umc6a</i>            | No              | Illinois High Protein x Illinois Low Protein <sup>1</sup> |
| Protein | 2.03    | <i>npi269</i>           | No              | Illinois High Protein x Illinois Low Protein <sup>5</sup> |
| Protein | 2.04    | <i>bnl12.09</i>         | Yes             | Illinois High Protein x Illinois Low Protein <sup>1</sup> |
| Protein | 2.05    | <i>dupssr21</i>         | Yes             | Illinois High Protein x Illinois Low Protein <sup>1</sup> |
| Protein | 2.06    | <i>umc1156</i>          | Yes             | Illinois High Protein x Illinois Low Protein <sup>1</sup> |
| Protein | 2.06/07 | <i>npi337</i>           | Yes             | Illinois High Protein x Illinois Low Protein <sup>1</sup> |
| Protein | 2.07    | <i>umc5a</i>            | Yes             | Illinois High Protein x Illinois Low Protein <sup>1</sup> |

Table S15: (continued...)

| Trait   | Chr.Bin | Marker/Interval         | NAM-QTL Overlap | Population Parentals <sup>(Reference)</sup>               |
|---------|---------|-------------------------|-----------------|-----------------------------------------------------------|
| Protein | 2.08    | <i>npi298</i>           | No              | Illinois High Protein x Illinois Low Protein <sup>1</sup> |
| Protein | 2.08    | <i>umc125</i>           | No              | Illinois High Protein x Illinois Low Protein <sup>5</sup> |
| Protein | 2.10    | <i>bnl17.14</i>         | Yes             | Illinois High Protein x Illinois Low Protein <sup>1</sup> |
| Protein | 3.01    | <i>umc121</i>           | No              | Illinois High Protein x Illinois Low Protein <sup>1</sup> |
| Protein | 3.03    | <i>php20042</i>         | No              | Illinois High Protein x Illinois Low Protein <sup>1</sup> |
| Protein | 3.03    | <i>bmc1144</i>          | No              | Illinois High Protein x Illinois Low Protein <sup>1</sup> |
| Protein | 3.03    | <i>bmc1523</i>          | No              | Illinois High Protein x Illinois Low Protein <sup>1</sup> |
| Protein | 3.04    | <i>umc154</i>           | No              | Illinois High Protein x Illinois Low Protein <sup>1</sup> |
| Protein | 3.04    | <i>npi249</i>           | No              | Illinois High Protein x Illinois Low Protein <sup>5</sup> |
| Protein | 3.04    | <i>umc10</i>            | Yes             | Illinois High Protein x Illinois Low Protein <sup>5</sup> |
| Protein | 3.05    | <i>phi073</i>           | Yes             | Illinois High Protein x Illinois Low Protein <sup>1</sup> |
| Protein | 3.06    | <i>bnl5.37b</i>         | No              | Illinois High Protein x Illinois Low Protein <sup>1</sup> |
| Protein | 3.07    | <i>bnl5.33b</i>         | No              | Illinois High Protein x Illinois Low Protein <sup>1</sup> |
| Protein | 3.07    | <i>umc16</i>            | No              | Illinois High Protein x Illinois Low Protein <sup>5</sup> |
| Protein | 3.08    | <i>php10080</i>         | No              | Illinois High Protein x Illinois Low Protein <sup>1</sup> |
| Protein | 3.08    | <i>umc17</i>            | No              | Illinois High Protein x Illinois Low Protein <sup>5</sup> |
| Protein | 3.08    | <i>npi432</i>           | No              | Illinois High Protein x Illinois Low Protein <sup>5</sup> |
| Protein | 3.09    | <i>php20726</i>         | No              | Illinois High Protein x Illinois Low Protein <sup>1</sup> |
| Protein | 3.09    | <i>sh2</i>              | No              | Illinois High Protein x Illinois Low Protein <sup>1</sup> |
| Protein | 3.09    | <i>umc63a</i>           | No              | Illinois High Protein x Illinois Low Protein <sup>1</sup> |
| Protein | 3.09    | <i>Sh2</i>              | No              | Illinois High Protein x Illinois Low Protein <sup>5</sup> |
| Protein | 3.09    | <i>umc63</i>            | No              | Illinois High Protein x Illinois Low Protein <sup>5</sup> |
| Protein | 3L      | <i>P10080</i>           | ?               | Illinois High Protein x Illinois Low Protein <sup>5</sup> |
| Protein | 4.03/05 | <i>nc004-phi026</i>     | No              | Illinois High Oil x Mo17 <sup>2</sup>                     |
| Protein | 5.01    | <i>umc72A</i>           | No              | Illinois High Protein x Illinois Low Protein <sup>5</sup> |
| Protein | 5.01/03 | <i>nc007-phi113</i>     | No              | Illinois High Oil x Mo17 <sup>2</sup>                     |
| Protein | 5.02    | <i>umc90</i>            | No              | Illinois High Protein x Illinois Low Protein <sup>5</sup> |
| Protein | 5.03    | <i>php20872</i>         | No              | Illinois High Protein x Illinois Low Protein <sup>1</sup> |
| Protein | 5.03    | <i>umc43</i>            | No              | Illinois High Protein x Illinois Low Protein <sup>5</sup> |
| Protein | 5.03    | <i>umc1</i>             | No              | Illinois High Protein x Illinois Low Protein <sup>5</sup> |
| Protein | 5.03    | <i>phi113-phi150018</i> | Yes             | Illinois High Oil x B73 <sup>2</sup>                      |

Table S15: (continued...)

| Trait   | Chr.Bin | Marker/Interval           | NAM-QTL Overlap | Population Parentals <sup>(Reference)</sup>               |
|---------|---------|---------------------------|-----------------|-----------------------------------------------------------|
| Protein | 5.05    | <i>npi237</i>             | No              | Illinois High Protein x Illinois Low Protein <sup>5</sup> |
| Protein | 5.08    | <i>umc104B</i>            | No              | Illinois High Protein x Illinois Low Protein <sup>5</sup> |
| Protein | 6.01/02 | <i>y1ssr-umc1006</i>      | Yes             | Illinois High Oil x Mo17 <sup>2</sup>                     |
| Protein | 6.04/05 | <i>nc009-umc21</i>        | No              | Illinois High Oil x B73 <sup>2</sup>                      |
| Protein | 6.05/06 | <i>phi129-dupssr15</i>    | Yes             | Illinois High Oil x B73 <sup>2</sup>                      |
| Protein | 7.03    | <i>php20746</i>           | No              | Illinois High Protein x Illinois Low Protein <sup>1</sup> |
| Protein | 7.03    | <i>npi455</i>             | Yes             | Illinois High Protein x Illinois Low Protein <sup>5</sup> |
| Protein | 7.03    | <i>dupssr009-bnlg1805</i> | No              | Illinois High Oil x Mo17 <sup>2</sup>                     |
| Protein | 7.04    | <i>bnl8.39</i>            | Yes             | Illinois High Protein x Illinois Low Protein <sup>5</sup> |
| Protein | 7.06    | <i>php20020</i>           | No              | Illinois High Protein x Illinois Low Protein <sup>1</sup> |
| Protein | 7L      | <i>P200746</i>            | ?               | Illinois High Protein x Illinois Low Protein <sup>5</sup> |
| Protein | 8.02    | <i>bnl9.11a</i>           | No              | Illinois High Protein x Illinois Low Protein <sup>1</sup> |
| Protein | 8.03    | <i>npi260b</i>            | Yes             | Illinois High Protein x Illinois Low Protein <sup>1</sup> |
| Protein | 8.03/04 | <i>bnl9.08</i>            | Yes             | Illinois High Protein x Illinois Low Protein <sup>1</sup> |
| Protein | 8.05/08 | <i>umc1130-bnlg1056</i>   | Yes             | Illinois High Oil x B73 <sup>2</sup>                      |
| Protein | 8.05    | <i>umc2c</i>              | Yes             | Illinois High Protein x Illinois Low Protein <sup>1</sup> |
| Protein | 8.05    | <i>bnlg1599-umc1130</i>   | Yes             | Illinoise High Oil x B73 <sup>2</sup>                     |
| Protein | 9.03    | <i>php20075b</i>          | Yes             | Illinois High Protein x Illinois Low Protein <sup>1</sup> |
| Protein | 9.03    | <i>phi027-umc81</i>       | Yes             | Illinois High Oil x B73 <sup>2</sup>                      |
| Protein | 9.05    | <i>npi443</i>             | Yes             | Illinois High Protein x Illinois Low Protein <sup>5</sup> |
| Protein | 9.07    | <i>umc20-npi291</i>       | Yes             | Illinois High Oil x B73 <sup>2</sup>                      |
| Protein | 10.00   | <i>phi118</i>             | ?               | Illinois High Protein x Illinois Low Protein <sup>1</sup> |
| Protein | 10.00   | <i>bnl10.17a</i>          | No              | Illinois High Protein x Illinois Low Protein <sup>1</sup> |
| Protein | 10.02   | <i>npi285a</i>            | No              | Illinois High Protein x Illinois Low Protein <sup>1</sup> |
| Protein | 10.02   | <i>phi059</i>             | Yes             | Illinois High Protein x Illinois Low Protein <sup>1</sup> |
| Protein | 10.03   | <i>umc130</i>             | Yes             | Illinois High Protein x Illinois Low Protein <sup>1</sup> |
| Protein | 10.07   | <i>npi320</i>             | No              | Illinois High Protein x Illinois Low Protein <sup>1</sup> |
| Protein | 10.07   | <i>bmc1185</i>            | Yes             | Illinois High Protein x Illinois Low Protein <sup>1</sup> |
| Oil     | 1.04/07 | <i>bnlg2086-umc1122</i>   | No              | By804 x B73 <sup>3</sup>                                  |
| Oil     | 1.07    | <i>npi447</i>             | Yes             | Illinois High Protein x Illinois Low Protein <sup>4</sup> |
| Oil     | 1.08    | <i>mmc0041-phi053</i>     | Yes             | Illinois High Oil x Mo17 <sup>2</sup>                     |
| Oil     | 2.04    | <i>umc134</i>             | Yes             | Illinois High Protein x Illinois Low Protein <sup>4</sup> |

Table S15: (continued...)

| Trait | Chr.Bin | Marker/Interval            | NAM-QTL Overlap | Population Parentals <sup>(Reference)</sup>               |
|-------|---------|----------------------------|-----------------|-----------------------------------------------------------|
| Oil   | 2.04/05 | <i>bnlg108-phi092</i>      | Yes             | By804 x B73 <sup>3</sup>                                  |
| Oil   | 2.06    | <i>npi456</i>              | No              | Illinois High Protein x Illinois Low Protein <sup>4</sup> |
| Oil   | 2.08    | <i>umc125</i>              | No              | Illinois High Protein x Illinois Low Protein <sup>4</sup> |
| Oil   | 3.04    | <i>umc10</i>               | Yes             | Illinois High Protein x Illinois Low Protein <sup>4</sup> |
| Oil   | 3.04    | <i>bnlg1019-npi247</i>     | Yes             | Illinois High Oil x B73 <sup>2</sup>                      |
| Oil   | 3.04    | <i>phi036-bnlg1019</i>     | No              | Illinois High Oil x Mo17 <sup>2</sup>                     |
| Oil   | 3.09    | <i>npi420</i>              | No              | Illinois High Protein x Illinois Low Protein <sup>4</sup> |
| Oil   | 4.01/04 | <i>phi213984-phi096</i>    | No              | By804 x B73 <sup>3</sup>                                  |
| Oil   | 4.04/05 | <i>phi096-bnlg1755</i>     | Yes             | By804 x B73 <sup>3</sup>                                  |
| Oil   | 4.07    | <i>umc104</i>              | Yes             | Illinois High Protein x Illinois Low Protein <sup>4</sup> |
| Oil   | 4.08    | <i>npi270</i>              | No              | Illinois High Protein x Illinois Low Protein <sup>4</sup> |
| Oil   | 4.08    | <i>npi410</i>              | No              | Illinois High Protein x Illinois Low Protein <sup>4</sup> |
| Oil   | 5.04    | <i>CO7CO2CD- php100014</i> | ?               | Illinois High Oil x B73 <sup>2</sup>                      |
| Oil   | 6.01    | <i>umc85</i>               | No              | Illinois High Protein x Illinois Low Protein <sup>4</sup> |
| Oil   | 6.02    | <i>npi377</i>              | No              | Illinois High Protein x Illinois Low Protein <sup>4</sup> |
| Oil   | 6.04    | <i>umc65-nc009</i>         | Yes             | Illinois High Oil x B73 <sup>2</sup>                      |
| Oil   | 6.04/05 | <i>nc009-umc21</i>         | Yes             | Illinois High Oil x Mo17 <sup>2</sup>                     |
| Oil   | 6.05    | <i>bnl5.47</i>             | Yes             | Illinois High Protein x Illinois Low Protein <sup>4</sup> |
| Oil   | 6.05    | <i>umc2319-phi129</i>      | No              | By804 x B73 <sup>3</sup>                                  |
| Oil   | 6.06    | <i>npi280</i>              | No              | Illinois High Protein x Illinois Low Protein <sup>4</sup> |

Table S15: (continued...)

| Trait | Chr.Bin | Marker/Interval         | NAM-QTL Overlap | Population Parentals <sup>(Reference)</sup>               |
|-------|---------|-------------------------|-----------------|-----------------------------------------------------------|
| Oil   | 6.08    | <i>umc38</i>            | No              | Illinois High Protein x Illinois Low Protein <sup>4</sup> |
| Oil   | 7.03    | <i>umc116</i>           | Yes             | Illinois High Protein x Illinois Low Protein <sup>4</sup> |
| Oil   | 7.03    | <i>bnlg1070-phi091</i>  | No              | Illinois High Oil x B73 <sup>2</sup>                      |
| Oil   | 7.04    | <i>bnl8.32T</i>         | No              | Illinois High Protein x Illinois Low Protein <sup>4</sup> |
| Oil   | 8.02    | <i>npi276</i>           | No              | Illinois High Protein x Illinois Low Protein <sup>4</sup> |
| Oil   | 8.02/03 | <i>phi119-umc1360</i>   | No              | By804 x B73 <sup>3</sup>                                  |
| Oil   | 8.03    | <i>npi260</i>           | No              | Illinois High Protein x Illinois Low Protein <sup>4</sup> |
| Oil   | 8.03/04 | <i>bnl9.08</i>          | No              | Illinois High Protein x Illinois Low Protein <sup>4</sup> |
| Oil   | 8.05    | <i>umc93</i>            | No              | Illinois High Protein x Illinois Low Protein <sup>4</sup> |
| Oil   | 8.05    | <i>bnlg162-bnlg1599</i> | No              | Illinois High Oil x B73 <sup>2</sup>                      |
| Oil   | 10.05   | <i>npi232</i>           | Yes             | Illinois High Protein x Illinois Low Protein <sup>4</sup> |

<sup>1</sup>Dudley J.W., Dijkhuizen A., Paul C., Coates S.T., Rocheford T.R. (2004) Effects of Random Mating on Marker-QTL Associations in the Cross of the Illinois High Protein x Illinois Low Protein Maize Strains. *Crop Sci* 44:1419-1428.

<sup>2</sup>Wassom J.J., Wong J.C., Martinez E., King J.J., DeBaene J., Hotchkiss J.R., Mikkilineni V., Bohn M.O., Rocheford T.R. (2008) QTL Associated with Maize Kernel Oil, Protein, and Starch Concentrations; Kernel Mass; and Grain Yield in Illinois High Oil x B73 Backcross-Derived Lines. *Crop Sci* 48:243-252.

<sup>3</sup>Zhang J., Lu X., Song X., Yan J., Song T., Dai J., Rocheford T., Li J. (2008) Mapping quantitative trait loci for oil, starch, and protein concentrations in grain with high-oil maize by SSR markers. *Euphytica* 162:335-344.

<sup>4</sup>Goldman I.L., Rocheford T.R., Dudley J.W. (1994) Molecular Markers Associated with Maize Kernel Oil Concentration in an Illinois High Protein x Illinois Low Protein Cross. *Crop Sci* 34:908-915.

<sup>5</sup>Goldman I.L., Rocheford T.R., Dudley J.W. (1993) Quantitative trait loci influencing protein and starch concentration in the Illinois Long Term Selection maize strains. *TAG Theoretical and Applied Genetics* 87:217-224.
